# Supplementary material for: Palladium-catalyzed carboxylative cyclization of propargylic amines with aryl iodides, CO2 and CO under ambient pressure
Source: Royal Society of Chemistry journal article supplement (doi:10.1039/d2cc01635d), 2022-01-01
Supplement: d2cc01635d1.pdf [file d2cc01635d1.pdf]

## Supporting Information

# Palladium-Catalyzed Carboxylative Cyclization of Propargylic Amine with Aryl Iodides, CO<sub>2</sub> and CO at Ambient Pressure

*Shuai-Fang Cai<sup>a</sup>, Li-Qi Qiu<sup>b</sup>, Wen-Bin Huang<sup>b</sup>, Hong-Ru Li<sup>a,b\*</sup>, Liang-Nian He<sup>b\*</sup>*

<sup>a</sup> College of Pharmacy, Nankai University, Tianjin, P. R. China.

<sup>b</sup> State Key Laboratory and Institute of Elemento-Organic Chemistry, College of Chemistry, Nankai University, Tianjin, P. R.

### Table of Contents

1. General Information
2. Synthesis and Characterization of Substrates
3. General Procedures and Reaction Optimization
4. Control Experiments
5. Gram-Scale Experiment
6. Characterization of Products
7. <sup>1</sup>H and <sup>13</sup>C Spectra of all Products
8. X-Ray Crystal Structure of **3aa**
9. References

## 1. General Information

Unless otherwise stated, all manipulations were performed using standard Schlenk techniques under a carbon dioxide and carbon monoxide atmosphere. All reagents were purchased from Aldrich, Macklin, DB, Across, Alfa Aesar, Heowns and TCI without further purification.

NMR spectra were recorded on  $^1\text{H}$  NMR, 400 MHz,  $^{13}\text{C}$  NMR, 101 MHz, spectrometer in  $\text{CDCl}_3$  at ambient temperature and chemical shifts are expressed in parts per million ( $\delta$ , ppm). Proton chemical shifts are referenced to 7.26 ppm ( $\text{CDCl}_3$ ) and carbon chemical shifts are referenced to 77.0 ppm ( $\text{CDCl}_3$ ). Data reporting uses the following abbreviations: s, singlet; d, doublet; t, triplet; m, multiplet; hept, heptet, and J, coupling constant in Hz. High resolution mass spectra (HRMS) were recorded on a Q-TOF mass spectrometry equipped with Z-spray ionization source. Fourier transform infrared (FT-IR) spectra were recorded on a Bruker Tensor 27 FT-IR spectrophotometer with KBr pellets. X-ray single crystal diffraction was detected with Rigaku 007 Saturn 70. The moles of  $\text{CO}_2$  and CO in the balloon were analyzed by gas chromatography (GC, FuLi 9790II) with a TCD detector and capillary column to determine.

## 2. Synthesis and Characterization of Substrates

### General Procedure for the Synthesis of Propargylamines (1a-1l, 5a-5i)<sup>1</sup>

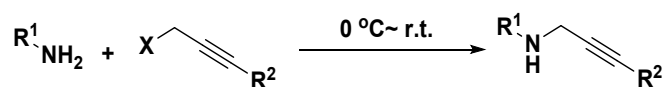

For the preparation of propargyl amines, the propargyl halide (1 equiv.) was added dropwise to the corresponding amine (6 equiv.) at 0 °C. Upon complete addition, the reaction was allowed to warm to room temperature and stirred for 16 h. Then, aqueous 1 M NaOH (4 mL/mmol) and EtOAc (4 mL/mmol) were added and the layers were separated. After extraction of the aqueous layer with EtOAc (2 x 4 mL/mmol), the combined organic layers were washed with brine, dried over Na<sub>2</sub>SO<sub>4</sub> and the solvent was removed under reduced pressure. The crude was purified by flash column chromatography (silica gel, Petrolether/EtOAc).

### Procedure for the Synthesis of 1m<sup>2</sup>

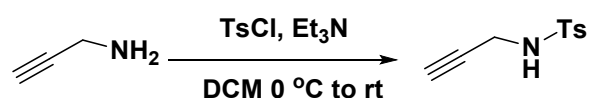

Prop-2-yn-1-amine (1.3 mL, 21 mmol) was dissolved in DCM (50 mL) and the solution was cooled to 0 °C. To this solution triethylamine (7 mL, 50 mmol) and p-toluenesulfonyl chloride (3.8 g, 20 mmol) were added sequentially. Then the mixture was allowed to warm to room temperature and stirred overnight. After that, the reaction mixture was dissolved in Et<sub>2</sub>O (200 mL), first washed with a solution of HCl (1M) and then with a saturated solution of NH<sub>4</sub>Cl. The organic layer was dried over Na<sub>2</sub>SO<sub>4</sub>, filtered and the solvent was evaporated, leading to 4-methyl-N-(prop-2-yn-1-yl) benzene-1-sulfonamide as a white powder.

### Procedure for the Synthesis of 1n<sup>3,4</sup>

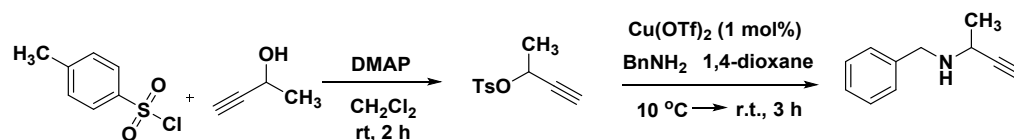

To a solution of 4-Dimethylaminopyridine (DMAP) (37 mg, 0.3 mmol) in CH<sub>2</sub>Cl<sub>2</sub> (3 mL), aqueous 3-butyn-2-ol (7.5 M, 1.5 mL, 11.3 mmol), aqueous NaOH (25%, 2 mL) and tosyl chloride (1.90 g, 10 mmol) were successively added at 0 °C, and then the mixture was stirred at rt for 2 h. After addition of H<sub>2</sub>O (30 mL), the reaction mixture was extracted with CH<sub>2</sub>Cl<sub>2</sub> (30 mL×3). Combined organic layer was washed with H<sub>2</sub>O (50 mL×3) and then dried over anhydrous MgSO<sub>4</sub>. Evaporation of

the solvent gave the corresponding 3-butyn-2-yl tosylate (1.97 g, 88%), which was used for next step without further purification.

A solution of Cu (OTf)<sub>2</sub> (0.0794 mmol) in 6.0 mL of 1,4-dioxane was cooled to 10 °C and treated with 1.2 mL of benzylamine (11 mmol). After 15 min, a solution of the tosyl alcohol (5 mmol) in 1,4-dioxane (6.0 mL) was slowly added. The reaction mixture was warmed to room temperature, stirred for 3 h, and extracted with 1 N HCl. The aqueous layer was neutralized with NaOH and then extracted with EtOAc. The organic extracts were dried (Na<sub>2</sub>SO<sub>4</sub>) and concentrated. The resulting greenish oil was purified by column chromatography on SiO<sub>2</sub> (hexanes/EtOAc 8:2) to afford the desired secondary amine as a yellow oil.

#### Procedure for the Synthesis of **1o**<sup>5</sup>

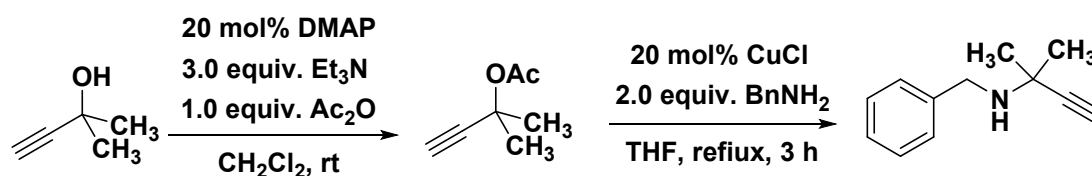

To the solution of DMAP (20 mol%, 4 mmol) and 2-methylbut-3-yn-2-ol (1.0 equiv., 20 mmol) in CH<sub>2</sub>Cl<sub>2</sub> (40 mL), Et<sub>3</sub>N (3.0 equiv., 60 mmol) and Ac<sub>2</sub>O (1.0 equiv., 20 mmol) were added, and the mixture was stirred at room temperature for 12 h. Upon completion, the solvent was removed under reduced pressure and the residue was purified by column chromatography (SiO<sub>2</sub>, eluent: CHCl<sub>3</sub>) to give 2-methylbut-3-yn-2-yl acetate as a colorless oil.

*N*-benzyl-2-methylbut-3-yn-2-amine was synthesized according to the procedure of the literature. To the solution of CuCl (20 mol%, 2 mmol) in THF (20 mL), propargyl acetate (1.0 eq., 10 mmol) and benzylamine (2.0 eq., 20 mmol) were added, and the mixture was refluxed for 3 h. After cooling to room temperature, the mixture was diluted with EtOAc and acidified with 2 N HCl. The aqueous layer was then neutralized with 1 N NaOH and extracted three times with CH<sub>2</sub>Cl<sub>2</sub>. The combined organic layers were washed with brine and dried over Na<sub>2</sub>SO<sub>4</sub>. After the solvent was removed under reduced pressure, the residue was purified by column chromatography (SiO<sub>2</sub>, eluent: EtOAc/ petroleum ether) to give *N*-benzyl-2-methylbut-3-yn-2-amine as a colorless solid.

The characterization data of substrates are in good agreement with literature value 1,2,3,4,5,6,7,8,9,10.

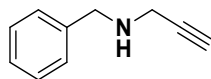

**N-benzylprop-2-yn-1-amine (1a)**, pale yellow oil,  $^1\text{H}$  NMR (400

MHz,  $\text{CDCl}_3$ ):  $\delta$  7.34-7.24 (m, 5H), 3.87 (s, 2H), 3.41 (s, 2H), 2.25 (s, 1H), 1.49 (s, 1H).  $^{13}\text{C}$  NMR (101 MHz,  $\text{CDCl}_3$ ): 139.4, 128.4, 127.1, 82.0, 71.5, 52.2, 37.3.

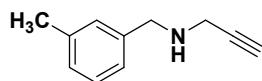

**N-(3-methylbenzyl) prop-2-yn-1-amine (1b)**, pale yellow oil,

$^1\text{H}$  NMR (400 MHz,  $\text{CDCl}_3$ )  $\delta$  7.26 – 7.05 (m, 4H), 3.84 (s, 2H), 3.43 (d,  $J = 2.4$  Hz, 2H), 2.34 (s, 3H), 2.26 (t,  $J = 2.4$  Hz, 1H), 1.60 (s, 1H).  $^{13}\text{C}$  NMR (101 MHz,  $\text{CDCl}_3$ ): 139.3, 138.1, 129.1, 128.3, 127.9, 125.4, 82.1, 71.5, 52.3, 37.3, 21.3.

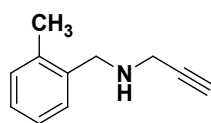

**N-(2-methylbenzyl) prop-2-yn-1-amine (1c)**, pale yellow oil,  $^1\text{H}$

NMR (400 MHz,  $\text{CDCl}_3$ )  $\delta$  7.23 (dd,  $J = 51.7, 3.3$  Hz, 4H), 3.86 (s, 2H), 3.45 (d,  $J = 2.5$  Hz, 2H), 2.37 (s, 3H), 2.26 (t,  $J = 2.5$  Hz, 1H), 1.53 (s, 1H).  $^{13}\text{C}$  NMR (101 MHz,  $\text{CDCl}_3$ )  $\delta$  137.3, 136.6, 130.1, 128.7, 127.2, 82.2, 71.5, 49.9, 37.6, 18.9.

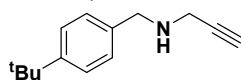

**N-(4-(tert-butyl) benzyl) prop-2-yn-1-amine (1d)**, yellow solid,

$^1\text{H}$  NMR (400 MHz,  $\text{CDCl}_3$ )  $\delta$  7.38 – 7.25 (m, 4H), 3.85 (s, 2H), 3.43 (s, 2H), 2.26 (s, 1H), 1.80 (s, 1H), 1.29 (s, 9H).  $^{13}\text{C}$  NMR (101 MHz,  $\text{CDCl}_3$ )  $\delta$  150.1, 136.2, 128.1, 125.3, 82.0, 71.5, 51.8, 37.3, 34.4, 31.4, 31.3.

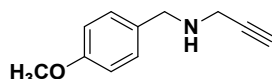

**N-(4-methoxybenzyl) prop-2-yn-1-amine (1e)**, pale yellow oil,

$^1\text{H}$  NMR (400 MHz,  $\text{CDCl}_3$ )  $\delta$  7.26 (d,  $J = 8.1$ , 2H), 6.86 (d,  $J = 8.3, 2.0$  Hz, 2H), 3.81 (d,  $J = 8.9$  Hz, 5H), 3.40 (s, 2H), 2.26 (t, 1H), 1.49 (s, 1H).  $^{13}\text{C}$  NMR (101 MHz,  $\text{CDCl}_3$ )  $\delta$  158.7, 131.4, 129.5, 113.78, 82.0, 71.4, 55.2, 51.5, 37.1.

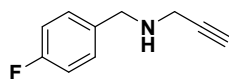

**N-(4-fluorobenzyl) prop-2-yn-1-amine (1f)**, pale yellow oil,  $^1\text{H}$

NMR (400 MHz,  $\text{CDCl}_3$ )  $\delta$  7.31 (dd,  $J = 8.5, 5.6$  Hz, 2H), 7.01 (t,  $J = 8.7$  Hz, 2H), 3.85 (s, 2H), 3.41 (d,  $J = 2.4$  Hz, 2H), 2.26 (t,  $J = 2.4$  Hz, 1H), 1.66 (s, 1H).  $^{13}\text{C}$  NMR (101 MHz,  $\text{CDCl}_3$ )  $\delta$  163.2, 160.8, 135.0, 130.0, 129.9, 115.3, 115.1, 81.9, 71.6, 51.4, 37.2.

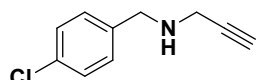

**N-(4-chlorobenzyl) prop-2-yn-1-amine (1g)**, pale yellow oil,  $^1\text{H}$

NMR (400 MHz,  $\text{CDCl}_3$ )  $\delta$  7.28 (s, 4H), 3.83 (s, 2H), 3.39 (s, 2H), 2.26 (s, 1H), 1.49

(s, 1H).  $^{13}\text{C}$  NMR (101 MHz,  $\text{CDCl}_3$ )  $\delta$  137.8, 132.7, 129.6, 128.4, 81.8, 71.7, 51.3, 37.1.

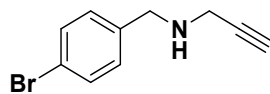

**N-(4-bromobenzyl) prop-2-yn-1-amine (1h)**, pale yellow oil,

$^1\text{H}$  NMR (400 MHz,  $\text{CDCl}_3$ )  $\delta$  7.28 (d,  $J = 8.3$  Hz, 2H), 7.23 (d,  $J = 8.2$  Hz, 2H), 3.84 (s, 2H), 3.41 (d,  $J = 2.4$  Hz, 2H), 2.26 (t,  $J = 2.4$  Hz, 1H), 1.54 (s, 1H).  $^{13}\text{C}$  NMR (101 MHz,  $\text{CDCl}_3$ )  $\delta$  138.4, 131.5, 130.1, 120.9, 81.8, 71.7, 51.5, 37.2.

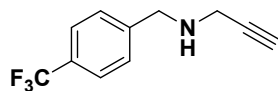

**N-(4-(trifluoromethyl) benzyl) prop-2-yn-1-amine (1i)**, pale

yellow oil,  $^1\text{H}$  NMR (400 MHz,  $\text{CDCl}_3$ )  $\delta$  7.62 – 7.44 (m, 4H), 3.95 (s, 2H), 3.42 (dd,  $J = 5.9, 2.4$  Hz, 2H), 2.28 (q,  $J = 2.8$  Hz, 1H), 1.85 (s, 1H).  $^{13}\text{C}$  NMR (101 MHz,  $\text{CDCl}_3$ )  $\delta$  143.4, 129.3, 128.6, 125.4, 125.3, 81.6, 78.4, 73.4, 71.9, 56.5, 51.6, 42.0, 37.3.

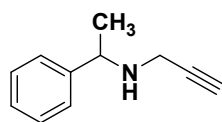

**N-(1-phenylethyl) prop-2-yn-1-amine (1j)**, pale yellow oil,  $^1\text{H}$

NMR (400 MHz,  $\text{CDCl}_3$ )  $\delta$  7.38 – 7.21 (m, 5H), 4.01 (q,  $J = 6.6$  Hz, 1H), 3.26 (ddd,  $J = 77.5, 17.1, 2.3$  Hz, 2H), 2.21 (t,  $J = 2.4$  Hz, 1H), 1.65 (s, 1H), 1.36 (d,  $J = 6.5$  Hz, 3H).  $^{13}\text{C}$  NMR (101 MHz,  $\text{CDCl}_3$ )  $\delta$  144.3, 128.5, 127.3, 127.2, 126.9, 82.2, 71.2, 56.3, 35.9, 23.9.

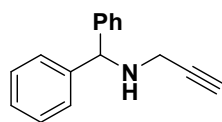

**N-benzhydrylprop-2-yn-1-amine (1k)**, white solid,  $^1\text{H}$  NMR (400

MHz,  $\text{CDCl}_3$ )  $\delta$  7.59 – 7.24 (m, 10H), 5.17 (s, 1H), 3.43 (s, 2H), 2.32 (s, 1H), 1.95 (s, 1H).  $^{13}\text{C}$  NMR (101 MHz,  $\text{CDCl}_3$ )  $\delta$  143.0, 128.5, 127.4, 127.2, 82.0, 71.6, 65.2, 36.1.

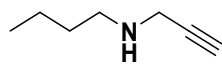

**N-(prop-2-yn-1-yl) butan-1-amine (1l)**, pale yellow oil,  $^1\text{H}$  NMR

(400 MHz,  $\text{CDCl}_3$ )  $\delta$  3.38 (d,  $J = 2.4$  Hz, 2H), 2.67 – 2.61 (m, 2H), 2.17 (t,  $J = 2.4$  Hz, 1H), 1.43 (dt,  $J = 14.1, 6.9$  Hz, 2H), 1.31 (dd,  $J = 15.1, 7.2$  Hz, 2H), 0.87 (t,  $J = 7.3$  Hz, 3H).  $^{13}\text{C}$  NMR (101 MHz,  $\text{CDCl}_3$ )  $\delta$  82.2, 71.0, 48.3, 38.1, 31.8, 20.3, 13.9.

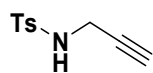

**4-methyl-N-(prop-2-yn-1-yl) benzenesulfonamide (1m)**, white power,

$^1\text{H}$  NMR (400 MHz,  $\text{CDCl}_3$ )  $\delta$  7.78 (d,  $J = 8.3$  Hz, 2H), 7.31 (d,  $J = 8.0$  Hz, 2H), 5.12 (s, 1H), 3.82 (d,  $J = 3.1$  Hz, 2H), 2.43 (s, 2H), 2.10 (t,  $J = 2.6$  Hz, 1H).  $^{13}\text{C}$  NMR (101 MHz,  $\text{CDCl}_3$ )  $\delta$  82.2, 71.0, 48.3, 38.1, 31.8, 20.3, 13.9.  $^{13}\text{C}$  NMR (101 MHz,  $\text{CDCl}_3$ )

$\delta$  143.7, 136.4, 129.6, 127.3, 77.9, 72.9, 32.7, 21.5.

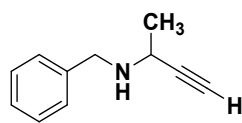

**N-benzylbut-3-yn-2-amine (1n)**, yellow oil,  $^1\text{H NMR}$  (400 MHz,  $\text{CDCl}_3$ )  $\delta$  7.37 – 7.23 (m, 5H), 4.02 (d,  $J = 12.8$  Hz, 1H), 3.81 (d,  $J = 12.8$  Hz, 1H), 3.49 (qd,  $J = 6.8, 1.9$  Hz, 1H), 2.32 (s, 1H), 1.38 (d,  $J = 6.8$  Hz, 3H);  $^{13}\text{C NMR}$  (101 MHz,  $\text{CDCl}_3$ )  $\delta$  139.8, 128.4, 127.0, 86.2, 70.8, 51.3, 44.2, 22.3.

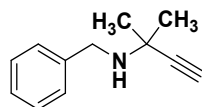

**N-benzyl-2-methylbut-3-yn-2-amine (1o)**, white solid,  $^1\text{H NMR}$  (400 MHz,  $\text{CDCl}_3$ )  $\delta$  7.42-7.29 (m, 5H), 3.91(s, 2H), 2.41 (s, 1H), 1.47 (s, 6H);  $^{13}\text{C NMR}$  (101 MHz,  $\text{CDCl}_3$ )  $\delta$  104.5, 128.4, 127.0, 88.9, 69.9, 50.0, 48.9, 29.5.

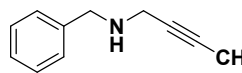

**N-benzylbut-2-yn-1-amine (5a)**, colourless oil,  $^1\text{H NMR}$  (400 MHz,  $\text{CDCl}_3$ ):  $\delta$  7.25-7.16 (m, 5H), 3.76 (s, 2H), 3.28 (s, 2H), 1.75 (s, 3H), 1.43 (s, 1H).  $^{13}\text{C NMR}$  (101 MHz,  $\text{CDCl}_3$ ): 139.7, 128.4, 127.0, 79.2, 76.1, 52.5, 37.9, 3.5.

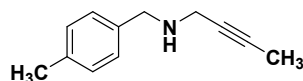

**N-(4-methylbenzyl) but-2-yn-1-amine (5b)**, yellow oil,  $^1\text{H NMR}$  (400 MHz,  $\text{CDCl}_3$ )  $\delta$  7.16 (dd,  $J = 40.1, 8.1$  Hz, 4H), 3.78 (s, 2H), 3.33 (s, 2H), 2.31 (s, 3H), 1.82 (s, 3H), 1.68 (s, 1H).  $^{13}\text{C NMR}$  (101 MHz,  $\text{CDCl}_3$ ): 136.4, 128.9, 128.1, 78.9, 52.0, 37.6, 20.9, 3.3.

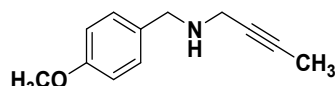

**N-(4-methoxybenzyl) but-2-yn-1-amine (5c)**, yellow oil,  $^1\text{H NMR}$  (400 MHz,  $\text{CDCl}_3$ )  $\delta$  7.25 (d,  $J = 8.6$  Hz, 2H), 6.85 (d,  $J = 8.5$  Hz, 2H), 3.78 (s, 5H), 3.35 (s, 2H), 1.83 (s, 3H), 1.70 (s, 1H).  $^{13}\text{C NMR}$  (101 MHz,  $\text{CDCl}_3$ ): 158.6, 131.7, 129.5, 113.7, 79.0, 55.1, 51.8, 37.6, 3.4.

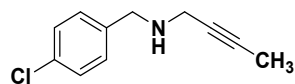

**N-(4-chlorobenzyl) but-2-yn-1-amine (5d)**, pale yellow oil,  $^1\text{H NMR}$  (400 MHz,  $\text{CDCl}_3$ )  $\delta$  7.28 (s, 4H), 3.82 (s, 2H), 3.35 (q,  $J = 2.4$  Hz, 2H), 1.84 (t,  $J = 2.4$  Hz, 3H).  $^{13}\text{C NMR}$  (101 MHz,  $\text{CDCl}_3$ )  $\delta$  138.0, 132.6, 129.6, 128.4, 79.3, 51.6, 37.6.

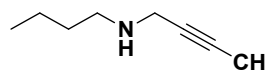

**N-butylbut-2-yn-1-amine (5e)**, pale yellow oil,  $^1\text{H NMR}$  (400 MHz,  $\text{CDCl}_3$ )  $\delta$  3.31 (s, 2H), 2.60 (t,  $J = 6.9$  Hz, 2H), 1.77 (s, 3H), 1.52 – 1.37 (m, 2H), 1.36 – 1.24 (m, 2H), 0.87 (t,  $J = 7.1$  Hz, 3H).;  $^{13}\text{C NMR}$  (101 MHz,  $\text{CDCl}_3$ )  $\delta$

78.5, 77.3, 48.4, 38.5, 31.9, 20.3, 13.8, 2.3.

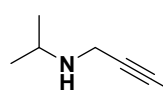

**N-isopropylbut-2-yn-1-amine (5f)**, pale yellow oil,  $^1\text{H NMR}$  (400 MHz,  $\text{CDCl}_3$ )  $\delta$  3.37 (s, 2H), 2.98(s, 1H), 1.81 (s, 1H), 1.51 (s, 1H), 1.05 (s, 6H).;  $^{13}\text{C NMR}$  (101 MHz,  $\text{CDCl}_3$ )  $\delta$  78.6, 47.0, 36.0, 22.5, 3.5.

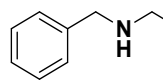

**N-benzyl-oct-2-yn-1-amine (5g)**, pale yellow oil,  $^1\text{H NMR}$  (400 MHz,  $\text{CDCl}_3$ )  $\delta$  7.38 – 7.22 (m, 5H), 3.86 (s, 2H), 3.40 (s, 2H), 2.20 (t,  $J = 7.0$  Hz, 2H), 1.70 (s, 1H), 1.52 (p,  $J = 7.0$  Hz, 2H), 1.36 (ddt,  $J = 20.4, 14.2, 7.1$  Hz, 4H), 0.91 (t,  $J = 7.0$  Hz, 3H).  $^{13}\text{C NMR}$  (101 MHz,  $\text{CDCl}_3$ )  $\delta$  139.6, 128.4, 127.0, 84.0, 77.8, 52.4, 37.8, 35.4, 31.1, 28.6, 22.2, 18.7, 14.1, 14.0.

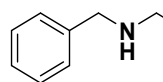

**N-benzyl-3-phenylprop-2-yn-1-amine (5h)**, yellow oil,  $^1\text{H NMR}$  (400 MHz,  $\text{CDCl}_3$ )  $\delta$  7.45-7.23 (m, 10H), 3.94 (s, 2H), 3.64 (s, 2H), 1.64(s, H).  $^{13}\text{C NMR}$  (101 MHz,  $\text{CDCl}_3$ )  $\delta$  139.5, 131.6, 128.4, 128.2, 128.0, 127.1, 123.2, 87.5, 83.7, 52.5, 38.2.

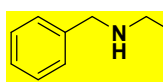

**N-benzyl-pent-2-yn-1-amine (5i)**, yellow oil,  $^1\text{H NMR}$  (400 MHz,  $\text{CDCl}_3$ )  $\delta$  7.37 – 7.22 (m, 5H), 3.85 (s, 2H), 3.39 (s, 2H), 2.22 (q,  $J = 7.6, 6.9$  Hz, 2H), 1.15 (t,  $J = 7.5$  Hz, 3H).  $^{13}\text{C NMR}$  (101 MHz,  $\text{CDCl}_3$ )  $\delta$  139.6, 128.3, 127.0, 85.3, 52.4, 37.8, 14.1 12.4.

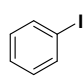

2a

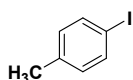

2b

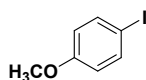

2c

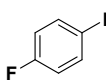

2d

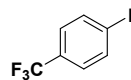

2e

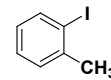

2f

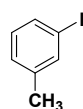

2g

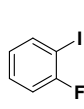

2h

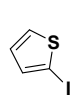

2i

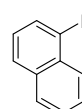

2k

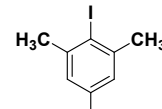

2j

Aryl iodides were commercially available.



### 3. General Procedures and Optimization of the Reaction Conditions

#### General procedures

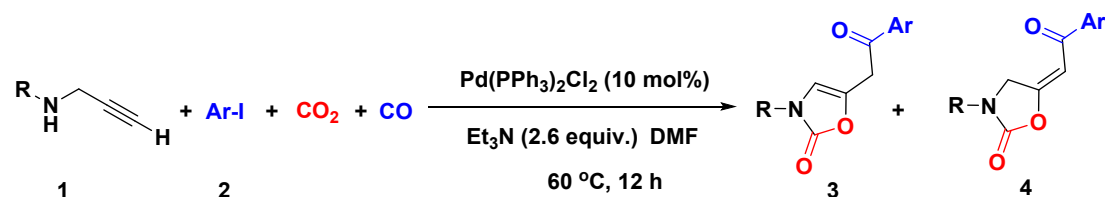

For the reactions incorporating terminal propargylic amines, an oven-dried Schlenk tube with a stir bar was charged with 1 (0.25 mmol), 2 (3.0 equiv.), Et<sub>3</sub>N (2.6 equiv.), Pd(PPh<sub>3</sub>)<sub>2</sub>Cl<sub>2</sub> (10 mol%) and 2.5 mL *N,N*-dimethylformamide (DMF). Then freeze-thaw was performed three times to expel the air in the system and the Schlenk tube was then connected with a balloon containing mixture of CO<sub>2</sub> and CO with a molar ratio 1:2. (the molar ratio of CO<sub>2</sub> to CO was determined by GC). Afterward, the reaction mixture was stirred at 60 °C for 12 h. After that, the solvent was evaporated under reduced pressure and the resulting crude product was purified by flash column chromatography (silica gel, Petrolether/EtOAc).

For the reactions that were performed under pressured CO<sub>2</sub> and CO mixture, a 25 mL glass lined autoclave with a stirring bar was used. Firstly, 1 (0.25 mmol), 2 (3.0 equiv.), Et<sub>3</sub>N (2.6 equiv.), Pd(PPh<sub>3</sub>)<sub>2</sub>Cl<sub>2</sub> (10 mol%) and 2.5 mL DMF were added into the autoclave and air in the system is evacuated. Then, CO<sub>2</sub> and CO were filled into the autoclave sequentially and the molar ratio of CO<sub>2</sub> to CO was calculated by the partial pressure of these two gases. Afterwards, the autoclave was heated to 60 °C and this temperature was kept for 12 h. Then the reaction was terminated by cooling to room temperature and releasing the pressure. Subsequently, the solvent was evaporated under reduced pressure and the resulting crude product was purified by flash column chromatography (silica gel, Petrolether/EtOAc).

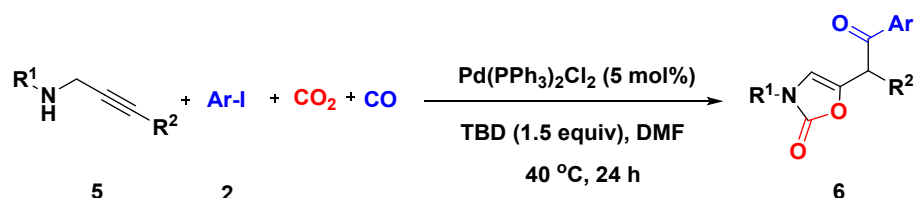

For the reactions incorporating internal propargylic amines, an oven-dried Schlenk tube with a stir bar was charged with 4 (0.25 mmol), 5 (1.5 equiv.), 1,5,7-triazabicyclo [4,4,0] dec-5-ene (TBD) (1.5 equiv.), Pd(PPh<sub>3</sub>)<sub>2</sub>Cl<sub>2</sub> (5 mol%), and 2.5 mL DMF. Then freeze-thaw was performed three times to expel the air in the system and the Schlenk tube was connected with a balloon containing CO<sub>2</sub> and CO mixture

with a molar ratio 1:2. (the molar ratio of CO<sub>2</sub> to CO was determined by GC). The reaction mixture was stirred at 40 °C for 24 h and the solvent was then evaporated under reduced pressure. The resulting crude product was purified by flash column chromatography (silica gel, Petrolether/EtOAc).

### Optimization of the Reaction Conditions

**Table S1 Screening of Ligand for Terminal Propargylic Amine <sup>a</sup>**

Reaction scheme: 1a + 2a + CO<sub>2</sub> + CO  $\xrightarrow[\text{Et}_3\text{N, DMF, 60 }^\circ\text{C, 12 h}]{\text{PdCl}_2, \text{L}}$  3aa + 4aa

| Entry | [L] (20 mol %)                  | Yield of 3aa (%) <sup>b</sup> |
|-------|---------------------------------|-------------------------------|
| 1     | dppf                            | n.d.                          |
| 2     | DPPP                            | trace                         |
| 3     | XantPhos                        | n.d.                          |
| 4     | DPE phos                        | n.d.                          |
| 5     | P( <i>o</i> -tol) <sub>3</sub>  | 37                            |
| 6     | ( <i>n</i> -Bu) <sub>3</sub> P  | 28                            |
| 7     | TFP                             | 33                            |
| 8     | P( <i>p</i> -anis) <sub>3</sub> | 62                            |
| 9     | P( <i>o</i> -anis) <sub>3</sub> | 68                            |
| 10    | PPh <sub>3</sub>                | 75                            |

<sup>a</sup>Reaction conditions: **1a** (36.3 mg, 0.25 mmol), **2a** (84 μL, 3.0 equiv.), PdCl<sub>2</sub> (4.4 mg, 10 mol%), Et<sub>3</sub>N (90 μL, 2.6 equiv), DMF (2.5 mL), CO<sub>2</sub>/CO balloon, 60 °C, 12 h. <sup>b</sup>Determined by <sup>1</sup>H NMR with 1,3,5-trimethoxybenzene as internal standard. n.d.= not detected.

Chemical structures of ligands: DPPF, DPPP, XantPhos, DPEPhos, PPh<sub>3</sub>, P(*o*-tol)<sub>3</sub>, P(*n*-Bu)<sub>3</sub>, TFP, P(*p*-anis)<sub>3</sub>, P(*o*-anis)<sub>3</sub>

**Table S2 Screening of Bases for Terminal Propargylic Amine <sup>a</sup>**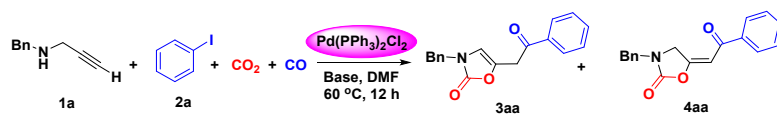

| Entry | Base (equiv.)                         | Yield of 3aa (%) <sup>b</sup> |
|-------|---------------------------------------|-------------------------------|
| 1     | DABCO (2.6)                           | 50                            |
| 2     | Et <sub>3</sub> N (2.6)               | 75                            |
| 3     | Cs <sub>2</sub> CO <sub>3</sub> (2.6) | n.d.                          |
| 4     | K <sub>2</sub> CO <sub>3</sub> (2.6)  | n.d.                          |
| 5     | DBU (2.6)                             | n.d.                          |
| 6     | Et <sub>2</sub> NH (2.6)              | n.d.                          |
| 7     | TBD (2.6)                             | 33                            |
| 8     | NaO <sup>t</sup> Bu (2.6)             | 29                            |
| 9     | Et <sub>3</sub> N (1)                 | 34                            |
| 10    | Et <sub>3</sub> N (1.5)               | 48                            |
| 11    | Et <sub>3</sub> N (3)                 | 60                            |
| 12    | ----                                  | n.d                           |

<sup>a</sup>Reaction conditions: **1a** (36.3 mg, 0.25 mmol), **2a** (84 μL, 3.0 equiv.), Pd(PPh<sub>3</sub>)<sub>2</sub>Cl<sub>2</sub> (17.6 mg, 10 mol%), DMF (2.5 mL), CO<sub>2</sub>/CO balloon, 60 °C, 12 h. <sup>b</sup>Determined by <sup>1</sup>H NMR with 1,3,5-trimethoxybenzene as internal standard. n.d.= not detected. DBU=1,8-Diazabicyclo [5.4.0] undec-7-ene, DABCO=Triethylenediamine.

**Table S3 Screen the amount of Iodobenzene for Terminal Propargylic Amine <sup>a</sup>**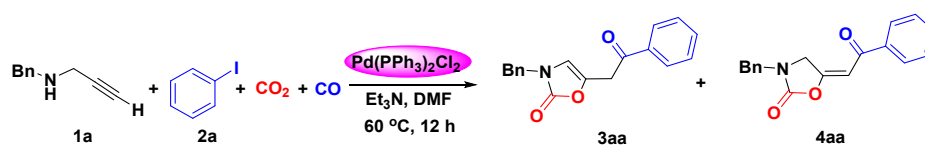

| Entry | 2a (equiv) | Yield of 3aa (%) <sup>b</sup> |
|-------|------------|-------------------------------|
| 1     | 1.5        | 53                            |
| 2     | 3          | 75                            |

<sup>a</sup> Reaction conditions: **1a** (36.3 mg, 0.25 mmol), Pd(PPh<sub>3</sub>)<sub>2</sub>Cl<sub>2</sub> (17.6 mg, 10 mol%), Et<sub>3</sub>N (90 μL, 2.6 equiv), DMF (2.5 mL), CO<sub>2</sub>/CO balloon, 60 °C, 12 h. <sup>b</sup>Determined by <sup>1</sup>H NMR with 1,3,5-trimethoxybenzene as internal standard.

**Table S4 Screening of Solvent for Terminal Propargylic Amine <sup>a</sup>**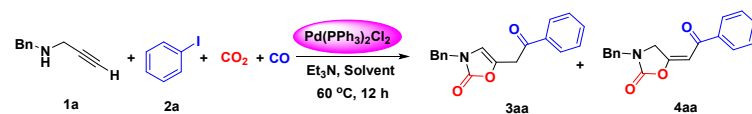

| Entry | Solvent | Yield of 3aa (%) <sup>b</sup> |
|-------|---------|-------------------------------|
| 1     | MeCN    | 46                            |
| 2     | Toluene | 28                            |
| 3     | DMSO    | 40                            |
| 4     | DMF     | 75                            |
| 5     | DMAC    | 53                            |

<sup>a</sup>Reaction conditions: **1a** (36.3 mg, 0.25 mmol), **2a** (84 μL, 3.0 equiv.), Pd(PPh<sub>3</sub>)<sub>2</sub>Cl<sub>2</sub> (17.6 mg, 10 mol%), Et<sub>3</sub>N (90 μL, 2.6 equiv.), Solvent (2.5 mL), CO<sub>2</sub>/CO balloon, 60 °C, 12 h. <sup>b</sup>Determined by <sup>1</sup>H NMR with 1,3,5-trimethoxybenzene as internal standard.

**Table S5 Screening of Time and Temperature for Terminal Propargylic Amine <sup>a</sup>**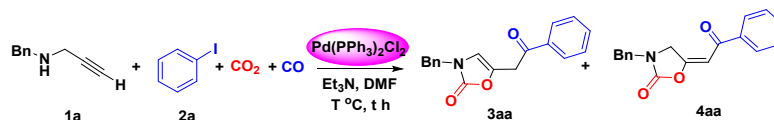

| Entry | Time (h) | Temperature (°C) | Yield of 3aa (%) <sup>b</sup> |
|-------|----------|------------------|-------------------------------|
| 1     | 8        | 60               | 63                            |
| 2     | 12       | 60               | 75                            |
| 3     | 16       | 60               | 76                            |
| 4     | 12       | 25               | 60                            |
| 5     | 12       | 40               | 64                            |
| 6     | 12       | 80               | 42                            |

<sup>a</sup>Reaction conditions: **1a** (36.3 mg, 0.25 mmol), **2a** (84 μL, 3.0 equiv.), Pd(PPh<sub>3</sub>)<sub>2</sub>Cl<sub>2</sub> (17.6 mg, 10 mol%), Et<sub>3</sub>N (90 μL, 2.6 equiv.), DMF (2.5 mL), CO<sub>2</sub>/CO balloon, <sup>b</sup>Determined by <sup>1</sup>H NMR with 1,3,5-trimethoxybenzene as internal standard.

**Table S6 Screening of Total Pressure and Molar ratio of CO<sub>2</sub> and CO for Terminal Propargylic Amine <sup>a</sup>**

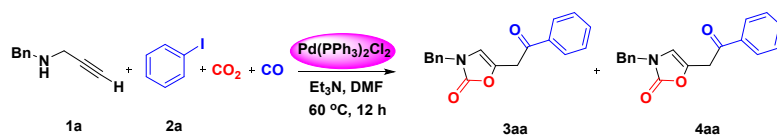

| Entry | Total pressure/bar | CO <sub>2</sub> /CO <sup>b</sup> | Yield of 3aa (%) <sup>c</sup> |
|-------|--------------------|----------------------------------|-------------------------------|
| 1     | 1                  | 1 1                              | 48                            |
| 2     | 10                 | 1 1                              | 53                            |
| 3     | 30                 | 1 1                              | 54                            |
| 4     | 1                  | 1 2                              | 75                            |
| 5     | 6                  | 2 1                              | 50                            |
| 6     | 6                  | 1 5                              | 68                            |
| 7     | 1                  | 0 1                              | n.d                           |
| 8     | 1                  | 1 0                              | n.d                           |

<sup>a</sup>Reaction conditions: **1a** (36.3 mg, 0.25 mmol), **2a** (84  $\mu$ L, 3.0 equiv.), Pd(PPh<sub>3</sub>)<sub>2</sub>Cl<sub>2</sub> (17.6 mg, 10 mol%), Et<sub>3</sub>N (90  $\mu$ L, 2.6 equiv.), DMF (2.5 mL), 60  $^{\circ}$ C, 12 h. <sup>b</sup>When the total pressure is higher than 1 bar, the reaction was performed in an autoclave and the molar ratio of CO<sub>2</sub> to CO was determined by their partial pressure. When CO<sub>2</sub>/CO balloon was used, the molar ratio of CO<sub>2</sub> to CO was determined by GC. <sup>c</sup>Determined by <sup>1</sup>H NMR with 1,3,5-trimethoxybenzene as internal standard. n.d.= not detected.

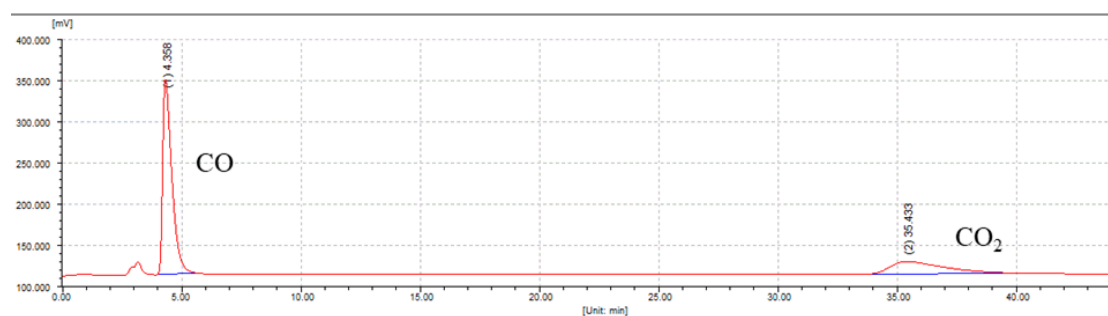

**Figure S1 Typical gas chromatogram of the CO<sub>2</sub> and CO mixture.**

Before the reaction, the gas (1 mL) in the balloon containing mixture of CO<sub>2</sub> and CO were taken using a syringe, and then analyzed by gas chromatography (GC, FuLi 9790II) with a TCD detector and capillary column to determine the moles of CO<sub>2</sub> and CO.

$$\frac{n_{CO_2}}{n_{CO}} = \frac{S_{CO_2} / S_{CO_2(1mL)}}{S_{CO} / S_{CO(1mL)}}$$

wherein  $S_{CO_2}$  and  $S_{CO}$  are the peak areas of CO<sub>2</sub> and CO in the gas chromatogram for gaseous mixture.  $S_{CO_2(1mL)}$  and  $S_{CO(1mL)}$  are the peak areas of 1 mL pure CO<sub>2</sub> and pure CO in the gas chromatogram respectively.

**Table S7 Effect of Additive on the Reaction <sup>a</sup>**

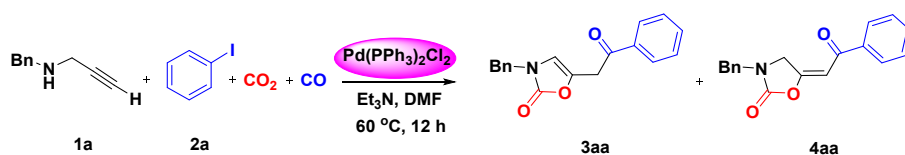

| Entry | Additive (equiv.)        | Yield of <b>3aa</b> (%) <sup>b</sup> |
|-------|--------------------------|--------------------------------------|
| 1     | $\text{O}_2$             | n.d.                                 |
| 2     | $\text{H}_2\text{O}$ (4) | 65                                   |

<sup>a</sup> Reaction conditions: **1a** (36.3 mg, 0.25 mmol), **2a** (84  $\mu\text{L}$ , 3.0 equiv.),  $\text{Pd(PPh}_3)_2\text{Cl}_2$  (17.6 mg, 10 mol%),  $\text{Et}_3\text{N}$  (90  $\mu\text{L}$ , 2.6 equiv.), DMF (2.5 mL),  $\text{CO}_2/\text{CO}$  balloon,  $60\text{ }^\circ\text{C}$ , 12 h. <sup>b</sup>Determined by  $^1\text{H}$  NMR with 1,3,5-trimethoxybenzene as internal standard.

**Table S8 Screening of Catalyst for Internal Propargylic Amine <sup>a</sup>**

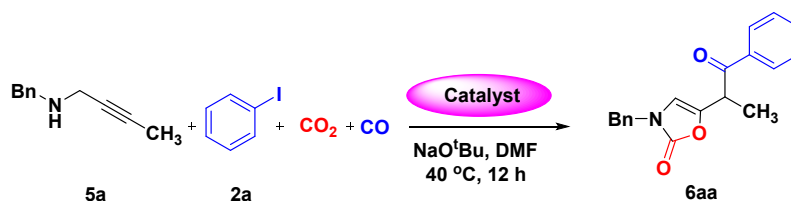

| Entry          | Catalyst (mol%)                        | Yield of <b>6aa</b> (%) <sup>b</sup> |
|----------------|----------------------------------------|--------------------------------------|
| 1 <sup>c</sup> | $\text{Pd(PPh}_3)_2\text{Cl}_2$ (5)    | n.d.                                 |
| 2              | $\text{Pd(PPh}_3)_2\text{Cl}_2$ (5)    | 35                                   |
| 3              | $\text{Pd(PPh}_3)_4$ (5)               | trace                                |
| 4              | $\text{Pd(OAc)}_2/\text{PPh}_3$ (5/10) | 23                                   |
| 5              | $\text{Pd/C/PPh}_3$ (5/10)             | n.d.                                 |
| 6              | $\text{Pd(PPh}_3)_2\text{Cl}_2$ (10)   | 39                                   |

<sup>a</sup> Reaction conditions: **5a** (39.8 mg, 0.25 mmol), **2a** (42  $\mu\text{L}$ , 1.5 equiv.),  $\text{NaO}^t\text{Bu}$  (1.5 equiv.), DMF (2.5 mL),  $\text{CO}_2/\text{CO}$  balloon,  $40\text{ }^\circ\text{C}$ , 12 h. <sup>b</sup>Determined by  $^1\text{H}$  NMR with 1,3,5-trimethoxybenzene as internal standard. n.d.= not detected. <sup>c</sup> $\text{Et}_3\text{N}$  (1.5 equiv.).

**Table S9 Screening of the Amount of Iodobenzene for Internal Propargylic Amine <sup>a</sup>**

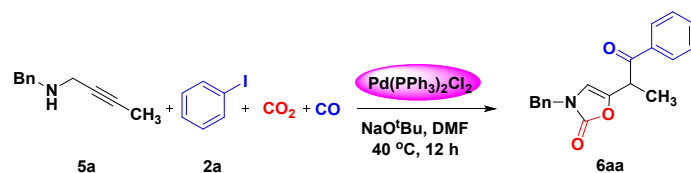

| Entry | 2a (equiv.) | Yield of 6aa (%) <sup>b</sup> |
|-------|-------------|-------------------------------|
| 1     | 1           | 39                            |
| 2     | 1.5         | 30                            |
| 3     | 3           | 36                            |

<sup>a</sup>Reaction conditions: **5a** (39.8 mg, 0.25 mmol), Pd(PPh<sub>3</sub>)<sub>2</sub>Cl<sub>2</sub> (8.8 mg, 5 mol%), NaO<sup>t</sup>Bu (36 mg, 1.5 equiv.), DMF (2.5 mL), CO<sub>2</sub>/ CO balloon, 40 °C, 12 h. <sup>b</sup>Determined by <sup>1</sup>H NMR with 1,3,5-trimethoxybenzene as internal standard.

**Table S10 Screening of Bases for Internal Propargylic Amine <sup>a</sup>**

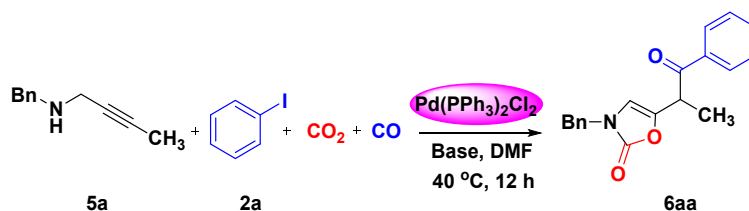

| Entry | Base (equiv.)                         | Yield of 6aa (%) <sup>b</sup> |
|-------|---------------------------------------|-------------------------------|
| 1     | Et <sub>3</sub> N (1.5)               | n.d.                          |
| 2     | NaO <sup>t</sup> Bu (1.5)             | 35                            |
| 3     | Cs <sub>2</sub> CO <sub>3</sub> (1.5) | n.d.                          |
| 4     | DBU (1.5)                             | 11                            |
| 5     | Et <sub>2</sub> NH (1.5)              | n.d.                          |
| 6     | K <sub>2</sub> CO <sub>3</sub> (1.5)  | n.d.                          |
| 7     | TBD (1.5)                             | 52                            |
| 8     | KO <sup>t</sup> Bu (1.5)              | 30                            |
| 9     | DABCO (1.5)                           | 22                            |
| 10    | TBD (1)                               | 50                            |
| 11    | TBD (3)                               | n.d.                          |

<sup>a</sup> Reaction conditions: **5a** (39.8 mg, 0.25 mmol), **2a** (42 μL, 1.5 equiv.), Pd(PPh<sub>3</sub>)<sub>2</sub>Cl<sub>2</sub> (8.8 mg, 5 mol%), DMF (2.5 mL), CO<sub>2</sub>/ CO balloon, 40 °C, 12 h. <sup>b</sup>Determined by <sup>1</sup>H NMR with 1,3,5-trimethoxybenzene as internal standard. n.d.= not detected.

**Table S11 Screening of Solvent for Internal Propargylic Amine <sup>a</sup>**

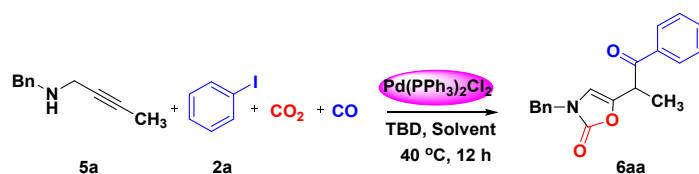

| Entry | Solvent | Yield of 6aa (%) <sup>b</sup> |
|-------|---------|-------------------------------|
| 1     | MeCN    | 46                            |
| 2     | Toluene | 24                            |
| 3     | THF     | trace                         |
| 4     | DMF     | 52                            |
| 5     | DMAC    | 45                            |

<sup>a</sup>Reaction conditions: **5a** (39.8 mg, 0.25 mmol), **2a** (42  $\mu$ L, 1.5 equiv.), Pd(PPh<sub>3</sub>)<sub>2</sub>Cl<sub>2</sub> (8.8 mg, 5 mol%), TBD (52.2 mg, 1.5 equiv.), Solvent (2.5 mL), CO<sub>2</sub>/CO balloon, 40 °C, 12 h. <sup>b</sup>Determined by <sup>1</sup>H NMR with 1,3,5-trimethoxybenzene as internal standard.

**Table S12 Screening of Time and Temperature for Internal Propargylic Amine <sup>a</sup>**

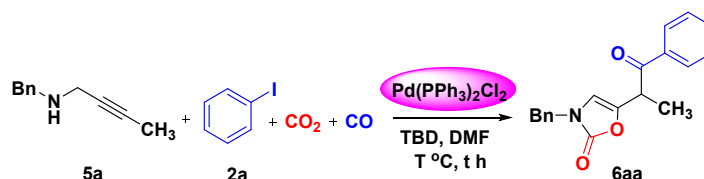

| Entry | Time (h) | Temperature (°C) | Yield of 6aa (%) <sup>b</sup> |
|-------|----------|------------------|-------------------------------|
| 1     | 12       | 40               | 52                            |
| 2     | 16       | 40               | 59                            |
| 3     | 24       | 25               | 44                            |
| 4     | 24       | 40               | 66 (57 <sup>c</sup> )         |
| 5     | 24       | 60               | 21                            |

<sup>a</sup>Reaction conditions: **5a** (39.8 mg, 0.25 mmol), **2a** (42  $\mu$ L, 1.5 equiv.), Pd(PPh<sub>3</sub>)<sub>2</sub>Cl<sub>2</sub> (8.8 mg, 5 mol%), TBD (52.2 mg, 1.5 equiv.), DMF (2.5 mL), CO<sub>2</sub>/CO balloon, <sup>b</sup>Determined by <sup>1</sup>H NMR with 1,3,5-trimethoxybenzene as internal standard. <sup>c</sup>Isolated yield.



## 4. Control Experiments

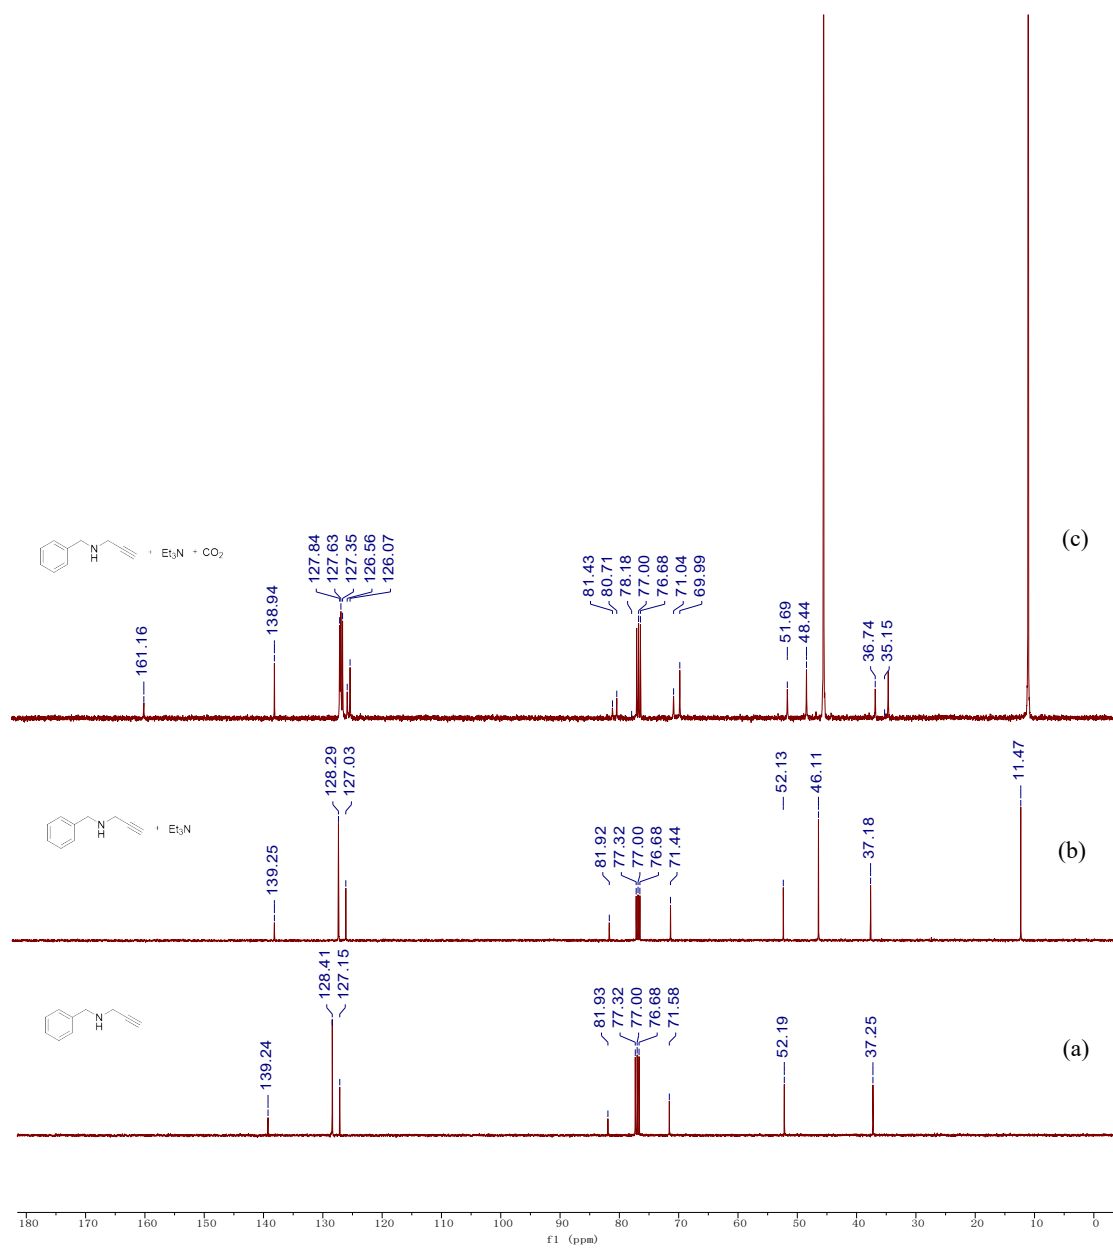

**Figure S2**  $^{13}\text{C}$  NMR investigation for interaction among 1a (36.3mg, 0.25 mmol),  $\text{Et}_3\text{N}$  (90  $\mu\text{L}$ , 3 equiv), and bubbled  $\text{CO}_2$  in  $\text{CDCl}_3$  (0.5 mL).

## 5. Gram-Scale Experiment

For the gram-scale experiment, an oven-dried Schlenk bottle with a stir bar was charged with **1a** (1.02 g, 7 mmol), **2** (7.6 mL, 3.0 equiv.), Et<sub>3</sub>N (2.5 mL, 2.6 equiv.), Pd(PPh<sub>3</sub>)<sub>2</sub>Cl<sub>2</sub> (0.49 g, 10 mol%) and 50 mL DMF. Then freeze-thaw was performed three times to expel the air in the system and the Schlenk bottle was then connected with a balloon containing mixture of CO<sub>2</sub> and CO with a molar ratio 1:2. (the molar ratio of CO<sub>2</sub> to CO was determined by GC). Afterward, the reaction mixture was stirred at 60 °C for 12 h. After that, the solvent was evaporated under reduced pressure and the resulting crude product was purified by flash column chromatography (silica gel, Petrolether/EtOAc).

### Scheme S1. Gram-Scale Experiment

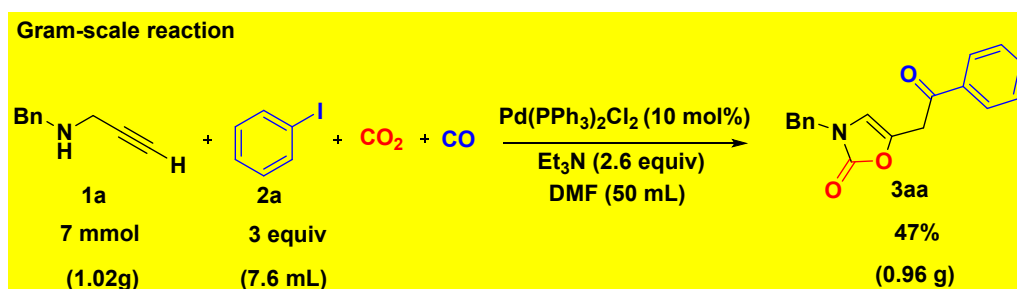

## 6. Characterization of Products

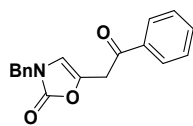

**3-benzyl-5-(2-oxo-2-phenylethyl) oxazol-2(3H)-one (3aa)**, pale yellow solid, m.p. 140~142 °C.  $R_f = 0.4$  (EtOAc/ petroleum ether = 1:2).  $^1\text{H NMR}$  (400 MHz,  $\text{CDCl}_3$ ):  $\delta$  7.94 (d,  $J = 7.5$  Hz, 2H), 7.60 (t,  $J = 7.3$  Hz, 1H), 7.48 (t,  $J = 7.6$  Hz, 2H), 7.35 (dd,  $J = 15.4, 8.2$  Hz, 3H), 7.28 (d,  $J = 7.3$  Hz, 2H), 6.48 (s, 1H), 4.70 (s, 1H), 4.09 (s, 2H).  $^{13}\text{C NMR}$  (101 MHz,  $\text{CDCl}_3$ ): 193.4, 155.3, 135.8, 135.3, 133.8, 133.7, 129.0, 128.8, 128.3, 128.2, 128.0, 113.0, 47.7, 35.7. **IR**: 3732, 3651, 3632, 3301, 2920, 2849, 1750, 1689, 1595, 1447, 1396, 1384, 1265, 1214, 1068, 750, 701, 688, 571, 550  $\text{cm}^{-1}$ . **HRMS (ESI)**  $m/z$  calcd for  $\text{C}_{18}\text{H}_{13}\text{NO}_3\text{Na}^+$  [ $\text{M}+\text{Na}^+$ ] 316.0944, found: 316.0948.

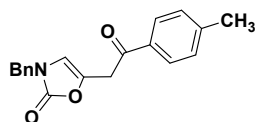

**3-benzyl-5-(2-oxo-2-(p-tolyl) ethyl) oxazol-2(3H)-one (3ab)**, yellow solid, m.p. 134-136 °C.  $R_f=0.4$  (EtOAc/petroleum ether = 1:1).  $^1\text{H NMR}$  (400 MHz,  $\text{CDCl}_3$ ):  $\delta$  7.84 (d,  $J = 8.1$  Hz, 2H), 7.36-7.29(m, 7H), 6.46 (s, 1H), 4.70 (s, 1H), 4.06 (s, 2H), 2.42 (s, 3H).  $^{13}\text{C NMR}$  (101 MHz,  $\text{CDCl}_3$ ): 193.1, 155.3, 144.8, 135.3, 133.9, 133.3, 129.5, 129.0, 128.3, 128.2, 128.0, 113.0, 47.6, 35.5, 21.6. **IR**: 2953, 2924, 2851, 1751, 1686, 1607, 1363, 1183, 1082, 1012, 962, 810, 741, 704, 687  $\text{cm}^{-1}$ . **HRMS (ESI)**  $m/z$  calcd for  $\text{C}_{19}\text{H}_{18}\text{NO}_3^+$  [ $\text{M}+\text{H}^+$ ] 308.1281, found: 308.1284.

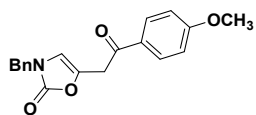

**3-benzyl-5-(2-(4-methoxyphenyl)-2-oxoethyl) oxazol-2(3H)-one (3ac)**, pale yellow solid, m.p. 146-147 °C.  $R_f=0.4$  (EtOAc/petroleum ether = 1:1).  $^1\text{H NMR}$  (400 MHz,  $\text{CDCl}_3$ ):  $\delta$  7.93 (d,  $J = 8.8$  Hz, 2H), 7.40 – 7.25 (m, 5H), 6.95 (d,  $J = 8.8$  Hz, 2H), 6.46 (s, 1H), 4.70 (s, 2H), 4.04 (s, 2H), 3.88 (s, 3H).  $^{13}\text{C NMR}$  (101 MHz,  $\text{CDCl}_3$ ): 191.9, 164.0, 155.3, 135.4, 134.0, 130.7, 129.0, 128.8, 128.2, 128.0, 114.0, 112.8, 55.5, 47.7, 35.4. **IR**: 2934, 2837, 1751, 1689, 1611, 1514, 1448, 1407, 1249, 1178, 1030, 1001, 759, 689  $\text{cm}^{-1}$ . **HRMS (ESI)**  $m/z$  calcd for  $\text{C}_{19}\text{H}_{18}\text{NO}_4^+$  [ $\text{M}+\text{H}^+$ ] 324.1230, found: 324.1230.

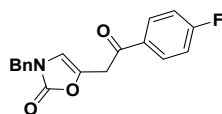

**3-benzyl-5-(2-(4-fluorophenyl)-2-oxoethyl) oxazol-2(3H)-one (3ad)**, white solid, m.p. 123-124 °C.  $R_f=0.4$  (EtOAc/petroleum ether = 1:1).  $^1\text{H NMR}$  (400 MHz,  $\text{CDCl}_3$ ):  $\delta$  7.87 (dd,  $J = 8.3, 5.5$  Hz, 2H), 7.23 (d,  $J = 9.6$  Hz, 2H), 7.20 –

7.14 (m, 3H), 7.05 (t,  $J = 8.5$  Hz, 2H), 6.35 (s, 1H), 4.60 (s, 2H), 3.95 (s, 2H).  $^{13}\text{C}$  NMR (101 MHz,  $\text{CDCl}_3$ ): 191.9, 167.4, 164.8, 155.2, 135.3, 133.4, 131.1, 131.0, 129.0, 128.3, 128.0, 116.2, 115.9, 113.1, 47.7, 35.7. **IR**: 3067, 3033, 2925, 1801, 1752, 1688, 1958, 1507, 1410, 1234, 1157, 1071, 1012, 962, 810, 741, 704, 687  $\text{cm}^{-1}$ . **HRMS (ESI)**  $m/z$  calcd for  $\text{C}_{18}\text{H}_{15}\text{FNO}_3^+$  [ $\text{M}+\text{H}^+$ ] 312.1030, found: 312.1028.

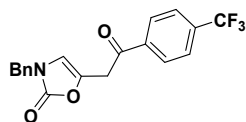

**3-benzyl-5-(2-oxo-2-(4-(trifluoromethyl) phenyl) ethyl) oxazol-**

**2(3H)-one (3ae)**, pale yellow solid, m.p.131-133 °C.  $R_f=0.4$  (EtOAc/petroleum ether = 1:1).  $^1\text{H}$  NMR (400 MHz,  $\text{CDCl}_3$ ):  $\delta$  8.05 (d,  $J = 8.1$  Hz, 2H), 7.75 (d,  $J = 8.2$  Hz, 2H), 7.41 – 7.25 (m, 5H), 6.49 (s, 1H), 4.71 (s, 2H), 4.12 (s, 2H).  $^{13}\text{C}$  NMR (101 MHz,  $\text{CDCl}_3$ ): 192.5, 155.1, 138.4, 135.3, 132.9, 129.0, 128.6, 128.3, 128.0, 113.3, 47.7, 36.1. **IR**: 3136, 3067, 3034, 2936, 1753, 1698, 1607, 1581, 1512, 1497, 1455, 1441, 1410, 1325, 1169, 1129, 1066, 1011, 960, 833, 747, 704, 604  $\text{cm}^{-1}$ . **HRMS (ESI)**  $m/z$  calcd for  $\text{C}_{19}\text{H}_{15}\text{F}_3\text{NO}_3^+$  [ $\text{M}+\text{H}^+$ ] 362.0999, found: 362.0993.

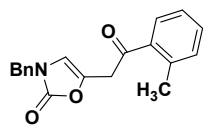

**3-benzyl-5-(2-oxo-2-(o-tolyl) ethyl) oxazol-2(3H)-one (3af)**, yellow

oil.  $R_f=0.4$  (EtOAc/petroleum ether = 1:1).  $^1\text{H}$  NMR (400 MHz,  $\text{CDCl}_3$ ):  $\delta$  7.65 (d,  $J = 7.7$  Hz, 1H), 7.42-7.28 (m, 8H), 6.44 (s, 1H), 4.70 (s, 2H), 4.01 (s, 2H), 2.49 (s, 3H).  $^{13}\text{C}$  NMR (101 MHz,  $\text{CDCl}_3$ ): 196.7, 155.2, 138.9, 135.3, 133.9, 132.2, 132.1, 128.9, 128.7, 128.2, 127.9, 125.8, 112.9, 47.6, 38.2, 21.4. **IR**: 2959, 2925, 1799, 1752, 1675, 1606, 1455, 1409, 1363, 1009, 889, 739, 703  $\text{cm}^{-1}$ . **HRMS (ESI)**  $m/z$  calcd for  $\text{C}_{19}\text{H}_{18}\text{NO}_3^+$  [ $\text{M}+\text{H}^+$ ] 308.1281, found: 308.1279.

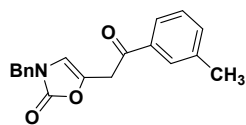

**3-benzyl-5-(2-oxo-2-(m-tolyl) ethyl) oxazol-2(3H)-one(3ag)**,

pale yellow solid, m.p.124-126 °C.  $R_f=0.4$  (EtOAc/petroleum ether = 1:1).  $^1\text{H}$  NMR (400 MHz,  $\text{CDCl}_3$ )  $\delta$  7.72 (d,  $J = 8.5$  Hz, 2H), 7.44 – 7.24 (m, 7H), 6.48 (s, 1H), 4.69 (s, 2H), 4.06 (s, 2H), 2.39 (s, 3H).  $^{13}\text{C}$  NMR (101 MHz,  $\text{CDCl}_3$ )  $\delta$  193.5, 155.1, 138.5, 135.6, 135.3, 134.4, 133.6, 128.8, 128.6, 128.6, 128.5, 128.1, 127.8, 125.4, 125.3, 113.0, 47.5, 35.6, 21.2. **IR**: 3136, 3062, 2923, 1750, 1689, 1604, 1585, 1497, 1454, 1441, 1397, 1365, 1262, 1245, 1161, 1083, 1070, 1029, 1014, 961, 745, 704, 688, 637, 613  $\text{cm}^{-1}$ . **HRMS (ESI)**  $m/z$  calcd for  $\text{C}_{19}\text{H}_{18}\text{NO}_3^+$  [ $\text{M}+\text{H}^+$ ] 308.1281, found: 308.1276.

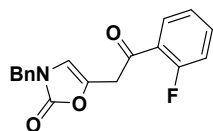

**3-benzyl-5-(2-(2-fluorophenyl)-2-oxoethyl) oxazol-2(3H)-one**

**(3ah)**, pale yellow solid, m.p.108-109 °C.  $R_f$ =0.4 (EtOAc/petroleum ether = 1:1).  $^1\text{H}$  NMR (400 MHz,  $\text{CDCl}_3$ )  $\delta$  7.87 (t,  $J$  = 8.5 Hz, 1H), 7.56 (q,  $J$  = 6.5, 5.4 Hz, 1H), 7.40 – 7.32 (m, 3H), 7.27 (dd,  $J$  = 8.6, 5.1 Hz, 3H), 7.15 (dd,  $J$  = 11.4, 8.3 Hz, 1H), 6.47 (s, 1H), 4.72 (s, 2H), 4.09 (s, 2H).  $^{13}\text{C}$  NMR (101 MHz,  $\text{CDCl}_3$ )  $\delta$  191.6, 162.2, 160.6, 155.3, 135.40, 133.5, 130.9, 129.0, 128.3, 127.9, 124.8, 124.7, 116.8, 116.6, 113.1, 47.6, 40.4, 40.3. **IR:** 3135, 3070, 3035, 1751, 1692, 1609, 1497, 1480, 1453, 1406, 1366, 1342, 1278, 1200, 1154, 1102, 1084, 1069, 995, 961, 764, 744, 704  $\text{cm}^{-1}$ . **HRMS (ESI)**  $m/z$  calcd for  $\text{C}_{18}\text{H}_{15}\text{FNO}_3^+$  [ $\text{M}+\text{H}^+$ ] 312.1030, found: 312.1026.

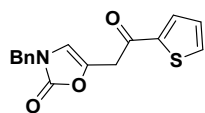

**3-benzyl-5-(2-oxo-2-(thiophen-2-yl) ethyl) oxazol-2(3H)-one (3ai)**,

pale yellow solid, m.p.102-103 °C.  $R_f$ =0.4 (EtOAc/petroleum ether = 1:1).  $^1\text{H}$  NMR (400 MHz,  $\text{CDCl}_3$ ):  $\delta$  7.77 (d,  $J$  = 3.7 Hz, 2H), 7.70 (d,  $J$  = 4.9 Hz, 2H), 7.41-7.32(m, 3H), 7.31-7.25(m, 2H), 7.16(t,  $J$  = 4.4 Hz, 1H), 6.45 (s, 1H), 4.71 (s, 2H), 4.01 (s, 2H).  $^{13}\text{C}$  NMR (101 MHz,  $\text{CDCl}_3$ ): 186.2, 155.2, 142.8, 135.0, 133.2, 133.0, 129.0, 128.4, 128.3, 128.0, 113.0, 112.8, 47.7, 36.4. **IR:** 2955, 2923, 2851, 1751, 1665, 1509, 1458, 1407, 1074, 737, 703  $\text{cm}^{-1}$ . **HRMS(ESI)**  $m/z$  calcd for  $\text{C}_{16}\text{H}_{14}\text{NO}_3\text{S}^+$  [ $\text{M}+\text{H}^+$ ] 300.0689, found: 300.0687.

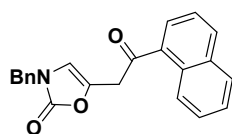

**3-benzyl-5-(2-(naphthalen-1-yl)-2-oxoethyl) oxazol-2(3H)-one**

**(3aj)**, yellow solid.  $R_f$  = 0.5 (EtOAc/petroleum ether = 1:1).  $^1\text{H}$  NMR (400 MHz,  $\text{CDCl}_3$ ):  $\delta$  8.61 (d,  $J$  = 8.2 Hz, 1H), 8.00 (d,  $J$  = 7.9 Hz, 1H), 7.88 (t,  $J$  = 7.2 Hz, 2H), 7.53 (ddd,  $J$  = 26.0, 15.2, 6.6 Hz, 3H), 7.30 (dd,  $J$  = 30.4, 6.7 Hz, 5H), 6.47 (s, 1H), 4.69 (s, 2H), 4.14 (s, 2H).  $^{13}\text{C}$  NMR (101 MHz,  $\text{CDCl}_3$ ): 196.9, 155.2, 135.3, 133.9, 133.8, 133.6, 130.1, 128.9, 128.5, 128.3, 128.2, 127.9, 126.6, 125.5, 124.2, 113.0, 47.6, 38.7. **IR:** 3138, 3082, 2929, 1752, 1685, 1593, 1572, 1507, 1455, 1439, 1399, 1363, 1233, 1175, 968, 942, 803, 775, 739, 703  $\text{cm}^{-1}$ . **HRMS(ESI)**  $m/z$  calcd for  $\text{C}_{22}\text{H}_{18}\text{NO}_3^+$  [ $\text{M}+\text{H}^+$ ] 344.1281, found: 344.1280.

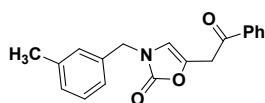

**3-(3-methylbenzyl)-5-(2-oxo-2-phenylethyl) oxazol-2(3H)-one**

**(3ba)**, pale yellow solid, m.p.100-102 °C.  $R_f$ =0.5 (EtOAc/petroleum ether = 1:2).  $^1\text{H}$

**NMR** (400 MHz, CDCl<sub>3</sub>):  $\delta$  7.71 (d,  $J$  = 7.7 Hz, 2H), 7.36 (t,  $J$  = 7.3 Hz, 1H), 7.24 (t,  $J$  = 7.6 Hz, 2H), 7.01 (dd,  $J$  = 13.6, 6.1 Hz, 1H), 6.87 (dd,  $J$  = 18.2, 8.9 Hz, 3H), 6.25 (s, 1H), 4.42 (s, 2H), 3.85 (s, 2H), 2.10 (3H). **<sup>13</sup>C NMR** (101 MHz, CDCl<sub>3</sub>): 193.4, 155.2, 138.7, 135.7, 135.2, 133.7, 133.5, 128.9, 128.7, 128.6, 124.9, 113.0, 47.5, 35.6, 21.2. **IR**: 3139, 3058, 2920, 1798, 1751, 1691, 1608, 1448, 1408, 1214, 1185, 1077, 1014, 959, 687, 754, 709, 689 cm<sup>-1</sup>. **HRMS (ESI)**  $m/z$  calcd for C<sub>19</sub>H<sub>18</sub>NO<sub>3</sub><sup>+</sup>[M+H<sup>+</sup>] 308.1281, found: 308.1280.

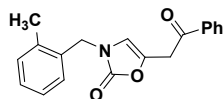

**3-(2-methylbenzyl)-5-(2-oxo-2-phenylethyl) oxazol-2(3H)-one**

**(3ca)**, pale yellow solid, m.p.106-107 °C.  $R_f$ =0.5 (EtOAc/petroleum ether = 1:2). **<sup>1</sup>H NMR** (400 MHz, CDCl<sub>3</sub>):  $\delta$  7.99 (d,  $J$  = 7.7 Hz, 2H), 7.65 (t,  $J$  = 7.3 Hz, 1H), 7.53 (t,  $J$  = 7.6 Hz, 2H), 7.35 – 7.21 (m, 4H), 6.41 (s, 1H), 4.76 (s, 2H), 4.13 (s, 2H), 2.36 (3H). **<sup>13</sup>C NMR** (101 MHz, CDCl<sub>3</sub>): 193.4, 155.0, 136.7, 133.8, 133.7, 133.1, 130.1, 129.0, 128.8, 128.6, 128.3, 126.4, 112.7, 45.7, 35.6, 19.0. **IR**: 3062, 3027, 2933, 1802, 1757, 1682, 1622, 1448, 1409, 1362, 1267, 1215, 1181, 1067, 1011, 896, 748, 696 cm<sup>-1</sup>. **HRMS (ESI)**  $m/z$  calcd for C<sub>19</sub>H<sub>18</sub>NO<sub>3</sub><sup>+</sup> [M+H<sup>+</sup>] 308.1281, found: 308.1278.

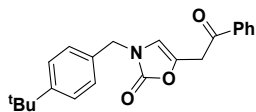

**3-(4-(tert-butyl) benzyl)-5-(2-oxo-2-phenylethyl) oxazol-2(3H)-one (3da)**, white solid, m.p.173-175 °C.  $R_f$ =0.5 (EtOAc/petroleum ether = 1:2). **<sup>1</sup>H NMR** (400 MHz, CDCl<sub>3</sub>):  $\delta$  7.95 (d,  $J$  = 7.6 Hz, 2H), 7.61 (t,  $J$  = 7.3 Hz, 1H), 7.49 (t,  $J$  = 7.4 Hz, 2H), 7.38 (d,  $J$  = 7.6 Hz, 2H), 7.22 (d,  $J$  = 7.8 Hz, 2H), 6.49 (s, 1H), 4.68 (s, 2H), 4.09 (s, 2H), 1.31 (s, 9H). **<sup>13</sup>C NMR** (101 MHz, CDCl<sub>3</sub>): 193.5, 155.2, 151.3, 135.7, 133.8, 133.4, 132.3, 128.8, 128.2, 127.7, 125.8, 113.1, 47.3, 35.7, 34.5, 31.2. **IR**: 2959, 1786, 1742, 1689, 1680, 1594, 1446, 1392, 1362, 1266, 1244, 1142, 1073, 1003, 956, 908, 886, 744, 731, 684 cm<sup>-1</sup>. **HRMS (ESI)**  $m/z$  calcd for C<sub>22</sub>H<sub>24</sub>NO<sub>3</sub><sup>+</sup> [M+H<sup>+</sup>] 350.1751, found: 350.1749.

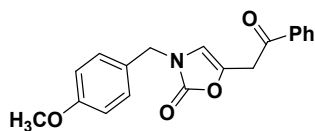

**3-(4-methoxybenzyl)-5-(2-oxo-2-phenylethyl) oxazol-2(3H)-one (3ea)**, white solid, m.p.107-108 °C.  $R_f$ =0.5 (EtOAc/petroleum ether = 1:2). **<sup>1</sup>H NMR** (400 MHz, CDCl<sub>3</sub>):  $\delta$  7.95(d,  $J$  = 7.5 Hz, 2H), 7.60 (t,  $J$  = 7.9 Hz, 2H), 7.49(t,  $J$  = 7.6 Hz, 2H), 7.23 (d,  $J$  = 8.4 Hz, 2H), 6.88 (d,  $J$  = 8.4 Hz, 2H), 6.46 (s, 1H), 4.08 (s, 2H), 3.80 (s, 3H). **<sup>13</sup>C NMR** (101 MHz, CDCl<sub>3</sub>): 193.5, 159.6, 155.2, 135.8, 133.8, 133.5, 129.5, 128.8, 128.3, 127.4, 114.3, 112.9, 55.3, 47.2, 35.7. **IR**: 2955, 2922,

2850, 1744, 1689, 1514, 1448, 1247, 1212, 1177, 1080, 1030, 818, 754, 687, 669  $\text{cm}^{-1}$ .

**HRMS (ESI)**  $m/z$  calcd for  $\text{C}_{19}\text{H}_{18}\text{NO}_4^+$   $[\text{M}+\text{H}^+]$  324.1231, found: 324.1228.

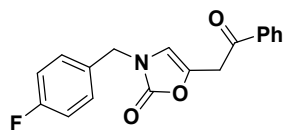

**3-(4-fluorobenzyl)-5-(2-oxo-2-phenylethyl) oxazol-2(3H)-one**

**(3fa)**, white solid, m.p.116-118 °C.  $R_f=0.4$  (EtOAc/petroleum ether = 1:2).  $^1\text{H NMR}$  (400 MHz,  $\text{CDCl}_3$ ):  $\delta$  7.94 (d,  $J = 7.7$  Hz, 2H), 7.61 (t,  $J = 7.4$  Hz, 1H), 7.48 (t,  $J = 7.6$  Hz, 2H), 7.27 (m, 2H), 7.04 (t,  $J = 8.6$  Hz, 2H), 6.51 (s, 1H), 4.68 (s, 2H), 4.10 (s, 2H).  $^{13}\text{C NMR}$  (101 MHz,  $\text{CDCl}_3$ ): 193.4, 163.8, 161.3, 155.1, 135.7, 133.8, 133.7, 131.2, 129.8, 129.7, 127.7, 128.8, 128.2, 116.0, 115.8, 112.9, 46.9, 35.6. **IR**: 3139, 3067, 2936, 1797, 1751, 1691, 1605, 1511, 1448, 1408, 1364, 1221, 1157, 1076, 1013, 1001, 958, 888, 824, 754, 689  $\text{cm}^{-1}$ . **HRMS (ESI)**  $m/z$  calcd for  $\text{C}_{18}\text{H}_{15}\text{FNO}_3^+$   $[\text{M}+\text{H}^+]$  312.1030, found: 312.1030.

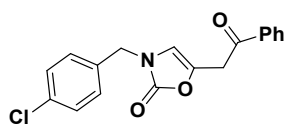

**3-(4-chlorobenzyl)-5-(2-oxo-2-phenylethyl) oxazol-2(3H)-one**

**(3ga)**, white solid, m.p.117-118 °C.  $R_f=0.4$  (EtOAc/petroleum ether = 1:2).  $^1\text{H NMR}$  (400 MHz,  $\text{CDCl}_3$ ):  $\delta$  7.95 (d,  $J = 7.5$  Hz, 2H), 7.60 (t,  $J = 6.8$  Hz, 1H), 7.49 (t,  $J = 7.2$  Hz, 2H), 7.38-7.20 (m, 4H), 6.50 (s, 1H), 4.68 (s, 2H), 4.11 (s, 2H).  $^{13}\text{C NMR}$  (101 MHz,  $\text{CDCl}_3$ ): 193.3, 155.1, 141.6, 135.7, 134.3, 133.9, 129.3, 129.2, 128.8, 128.2, 112.9, 47.0, 35.6. **IR**: 3137, 3063, 2914, 1750, 1691, 1605, 1597, 1492, 1448, 1397, 1216, 1078, 1015, 959, 889, 802, 754, 688, 624  $\text{cm}^{-1}$ . **HRMS (ESI)**  $m/z$  calcd for  $\text{C}_{18}\text{H}_{15}\text{ClNO}_3^+$   $[\text{M}+\text{H}^+]$  328.0735, found: 328.0733.

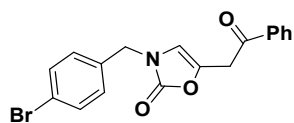

**3-(4-bromobenzyl)-5-(2-oxo-2-phenylethyl) oxazol-2(3H)-one**

**(3ha)**, yellow solid, m.p.134-135 °C.  $R_f=0.3$  (EtOAc/petroleum ether = 1:2).  $^1\text{H NMR}$  (400 MHz,  $\text{CDCl}_3$ ):  $\delta$  7.96 (d,  $J = 7.3$  Hz, 2H), 7.63 (t,  $J = 6.9$  Hz, 1H), 7.50 (d,  $J = 5.4$  Hz, 4H), 7.19 (d,  $J = 7.0$  Hz, 2H), 6.52 (s, 1H), 4.68 (s, 2H), 4.12 (s, 2H).  $^{13}\text{C NMR}$  (101 MHz,  $\text{CDCl}_3$ ): 193.3, 155.1, 135.7, 134.4, 133.8, 132.1, 129.6, 128.8, 128.2, 122.4, 112.9, 47.0, 35.6. **IR**: 3138, 3062, 2936, 1797, 1751, 1690, 1605, 1596, 1579, 1489, 1448, 1398, 1215, 1070, 1012, 958, 888, 842, 798, 753, 688  $\text{cm}^{-1}$ . **HRMS (ESI)**  $m/z$  calcd for  $\text{C}_{18}\text{H}_{15}\text{BrNO}_3^+$   $[\text{M}+\text{H}^+]$  372.0230, found: 372.0229.

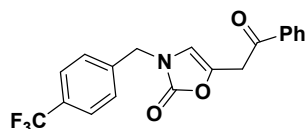

**5-(2-oxo-2-phenylethyl)-3-(4-(trifluoromethyl) benzyl) oxazol-2(3H)-one (3ia)**, pale yellow solid, m.p. 116-117 °C.  $R_f = 0.4$  (EtOAc/petroleum ether = 1:2).  $^1\text{H NMR}$  (400 MHz,  $\text{CDCl}_3$ )  $\delta$  7.94 (d,  $J = 7.3$  Hz, 2H), 7.62 (d,  $J = 8.0$  Hz, 3H), 7.49 (t,  $J = 7.7$  Hz, 2H), 7.40 (d,  $J = 8.0$  Hz, 2H), 6.54 (s, 1H), 4.77 (s, 2H), 4.12 (s, 2H).  $^{13}\text{C NMR}$  (101 MHz,  $\text{CDCl}_3$ ): 193.3, 155.1, 139.4, 135.7, 134.1, 133.9, 128.9, 128.2, 128.1, 126.0, 125.9, 113.0, 47.2, 36.1. **IR**: 3136, 3061, 2915, 1752, 1692, 1597, 1581, 1449, 1409, 1366, 1325, 1275, 1261, 1216, 1164, 1124, 1112, 1066, 1018, 1001, 954, 907, 845, 819, 750, 687  $\text{cm}^{-1}$ . **HRMS (ESI)**  $m/z$  calcd for  $\text{C}_{19}\text{H}_{15}\text{F}_3\text{NO}_3^+$   $[\text{M}+\text{H}^+]$  362.0999, found: 362.0995.

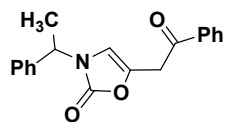

**5-(2-oxo-2-phenylethyl)-3-(1-phenylethyl) oxazol-2(3H)-one(3ja)**, yellow oil,  $R_f = 0.5$  (EtOAc/petroleum ether = 1:2).  $^1\text{H NMR}$  (400 MHz,  $\text{CDCl}_3$ )  $\delta$  7.94 (d,  $J = 7.0$  Hz, 2H), 7.59 (t,  $J = 7.4$  Hz, 1H), 7.47 (t,  $J = 7.6$  Hz, 2H), 7.34 (dt,  $J = 13.9, 7.0$  Hz, 5H), 6.55 (s, 1H), 5.30 (q,  $J = 7.1$  Hz, 1H), 4.09 (d,  $J = 6.5$  Hz, 2H), 1.69 (d,  $J = 7.1$  Hz, 3H).  $^{13}\text{C NMR}$  (101 MHz,  $\text{CDCl}_3$ ): 193.5, 154.7, 139.7, 135.7, 133.7, 133.5, 128.8, 128.2, 128.0, 126.5, 110.7, 52.5, 35.7, 19.2. **IR**: 3135, 3062, 3032, 2981, 2937, 1749, 1692, 1597, 1580, 1495, 1449, 1385, 1341, 1275, 1261, 1214, 1173, 1159, 1103, 1080, 1025, 1000, 954, 915, 887, 750, 699, 660  $\text{cm}^{-1}$ . **HRMS (ESI)**  $m/z$  calcd for  $\text{C}_{19}\text{H}_{18}\text{NO}_3^+$   $[\text{M}+\text{H}^+]$  308.1281, found: 308.1276.

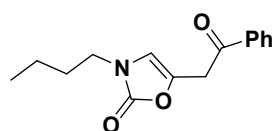

**3-butyl-5-(2-oxo-2-phenylethyl) oxazol-2(3H)-one (3ja)**, yellow oil,  $R_f = 0.5$  (EtOAc/petroleum ether = 1:2).  $^1\text{H NMR}$  (400 MHz,  $\text{CDCl}_3$ ):  $\delta$  7.98 (d,  $J = 7.7$  Hz, 2H), 7.62 (t,  $J = 7.2$  Hz, 1H), 7.50 (t,  $J = 7.4$  Hz, 2H), 6.57 (s, 1H), 4.13 (s, 2H), 3.54 (t,  $J = 7.1$  Hz, 2H), 1.65 (dt,  $J = 14.8, 7.2$  Hz, 2H), 1.36 (td,  $J = 14.6, 7.2$  Hz, 2H), 0.94 (t,  $J = 7.3$  Hz, 3H).  $^{13}\text{C NMR}$  (101 MHz,  $\text{CDCl}_3$ ): 193.6, 155.2, 135.8, 133.8, 133.3, 128.8, 128.3, 113.3, 43.7, 35.7, 30.8, 19.6, 13.5. **IR**: 2959, 2930, 2873, 1748, 1692, 1448, 1408, 1214, 1075, 1000, 957, 742, 689  $\text{cm}^{-1}$ . **HRMS (ESI)**  $m/z$  calcd for  $\text{C}_{15}\text{H}_{18}\text{NO}_3^+$   $[\text{M}+\text{H}^+]$  260.1281, found: 260.1280.



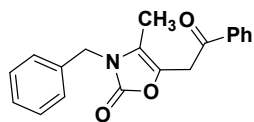

**3-benzyl-4-methyl-5-(2-oxo-2-phenylethyl) oxazol-2(3H)-one**

**(30a)**, yellow solid, m.p.85-87 °C.  $R_f=0.3$  (EtOAc/petroleum ether = 1:2).  $^1\text{H NMR}$  (400 MHz,  $\text{CDCl}_3$ ):  $\delta$  8.00 (d,  $J = 7.8$  Hz, 2H), 7.62 (t,  $J = 7.3$  Hz, 1H), 7.51 (t,  $J = 7.6$  Hz, 2H), 7.31 (ddd,  $J = 20.4, 13.9, 7.1$  Hz, 5H), 4.77 (s, 2H), 4.05 (s, 2H), 1.91 (s, 3H).  $^{13}\text{C NMR}$  (101 MHz,  $\text{CDCl}_3$ ): 194.0, 155.7, 136.1, 135.8, 133.7, 128.9, 128.8, 128.5, 127.9, 127.0, 121.2, 45.4, 35.0, 8.3. **IR**: 3060, 3033, 2926, 1751, 1691, 1596, 1579, 1496, 1448, 1403, 1384, 1352, 1213, 1179, 1112, 1079, 1044, 755, 719, 692, 626  $\text{cm}^{-1}$ . **HRMS (ESI)**  $m/z$  calcd for  $\text{C}_{19}\text{H}_{18}\text{NO}_3^+$   $[\text{M}+\text{H}^+]$  308.1281, found:308.1279.

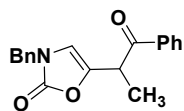

**3-benzyl-5-(1-oxo-1-phenylpropan-2-yl) oxazol-2(3H)-one (6aa)**, pale yellow oil,  $R_f = 0.4$  (EtOAc/petroleum ether = 1:4).  $^1\text{H NMR}$  (400 MHz,  $\text{CDCl}_3$ ):  $\delta$  7.95 (d,  $J = 7.2$  Hz, 2H), 7.59 (t,  $J = 7.3$  Hz, 1H), 7.47 (t,  $J = 6.8$  Hz, 2H), 7.33 (s, 2H), 7.24 (s, 2H), 6.26 (s, 1H), 4.66 (dd,  $J = 32.9, 15.0$  Hz, 1H), 4.56 (d,  $J = 6.9$  Hz, 1H), 1.44 (d,  $J = 7.0$  Hz, 2H).  $^{13}\text{C NMR}$  (101 MHz,  $\text{CDCl}_3$ ):197.3, 155.1, 139.2, 135.2, 133.5, 129.0, 128.8, 128.6, 128.4, 127.7, 111.4, 47.5, 38.7, 15.3. **IR**: 2956, 2923, 1749, 1677, 1595, 1615, 1451, 1378, 1264, 1184, 1078, 1011, 895, 739, 703  $\text{cm}^{-1}$ . **HRMS (ESI)**  $m/z$  calcd for  $\text{C}_{19}\text{H}_{18}\text{NO}_3^+$   $[\text{M}+\text{H}^+]$  308.1281, found: 308.1280.

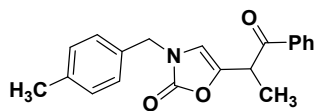

**3-(4-methylbenzyl)-5-(1-oxo-1-phenylpropan-2-yl)oxazol-2(3H)-one (6ab)**, yellow oil;  $R_f = 0.5$  (EtOAc/petroleum ether = 1:3).  $^1\text{H NMR}$  (400 MHz,  $\text{CDCl}_3$ )  $\delta$  7.95 (d,  $J = 7.7$  Hz, 2H), 7.58 (t,  $J = 7.4$  Hz, 1H), 7.46 (t,  $J = 7.7$  Hz, 2H), 7.13 (s, 4H), 6.25 (s, 1H), 4.68 – 4.58 (m, 2H), 4.54 (d,  $J = 6.6$  Hz, 1H), 2.33 (s, 3H), 1.43 (d,  $J = 7.1$  Hz, 3H).  $^{13}\text{C NMR}$  (101 MHz,  $\text{CDCl}_3$ ):197.3, 155.1, 139.1, 138.0, 135.2, 133.5, 132.1, 129.5, 128.7, 128.5, 127.8, 111.3, 47.3, 38.7, 21.0, 15.4. **IR**: 3135, 3058, 2937, 2873, 1755, 1688, 1596, 1516, 1448, 1400, 1363, 1275, 1214, 1173, 1056, 1001, 968, 756, 723, 689, 655, 472  $\text{cm}^{-1}$ . **HRMS (ESI)**  $m/z$  calcd for  $\text{C}_{20}\text{H}_{20}\text{NO}_3^+$   $[\text{M}+\text{H}^+]$  322.1438, found: 322.1434.

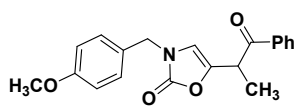

**3-(4-methoxybenzyl)-5-(1-oxo-1-phenylpropan-2-yl)oxazol-2(3H)-one(6ac)**, yellow oil;  $R_f = 0.5$  (EtOAc/petroleum ether = 1:3).  $^1\text{H NMR}$  (400 MHz,

MHz, CDCl<sub>3</sub>)  $\delta$  7.94 (d,  $J = 7.5$  Hz, 2H), 7.57 (t,  $J = 7.4$  Hz, 2H), 7.45 (t,  $J = 7.7$  Hz, 1H), 7.17 (d,  $J = 8.3$  Hz, 2H), 6.85 (d,  $J = 8.5$  Hz, 2H), 6.22 (s, 1H), 4.65-4.55 (m, 2H), 4.53 (d,  $J = 6.7$  Hz, 1H), 3.78 (s, 3H), 1.42 (d,  $J = 7.1$  Hz, 3H). <sup>13</sup>C NMR (101 MHz, CDCl<sub>3</sub>): 197.4, 159.5, 155.1, 139.2, 135.3, 129.4, 128.8, 128.6, 128.5, 127.2, 114.2, 111.3, 111.1, 55.2, 47.1, 38.9, 15.6. **IR:** 2929, 2850, 1750, 1687, 1612, 1514, 1448, 1402, 1249, 1177, 1032, 969, 820, 726, 689 cm<sup>-1</sup>. **HRMS (ESI)**  $m/z$  calcd for C<sub>20</sub>H<sub>20</sub>NO<sub>4</sub><sup>+</sup> [M+H<sup>+</sup>] 338.1387, found: 338.1383.

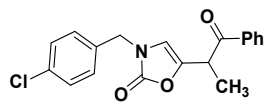

**3-(4-chlorobenzyl)-5-(1-oxo-1-phenylpropan-2-yl) oxazol-2(3H)-one (6ad)**, yellow oil;  $R_f = 0.4$  (EtOAc/petroleum ether = 1:3). <sup>1</sup>H NMR (400 MHz, CDCl<sub>3</sub>)  $\delta$  7.89 (d,  $J = 8.7$  Hz, 2H), 7.53 (t,  $J = 7.4$  Hz, 1H), 7.41 (t,  $J = 7.7$  Hz, 2H), 7.25 (d,  $J = 8.3$  Hz, 2H), 7.12 (d,  $J = 8.4$  Hz, 2H), 6.20 (s, 1H), 4.68-4.54 (m, 2H), 4.52-4.44 (m, 1H), 1.39 (d,  $J = 7.1$  Hz, 3H). <sup>13</sup>C NMR (101 MHz, CDCl<sub>3</sub>): 197.3, 155.1, 139.6, 135.3, 134.2, 133.8, 133.7, 129.2, 129.1, 128.8, 128.5, 111.2, 47.0, 38.8, 15.6. **IR:** 3136, 3059, 2986, 2937, 1749, 1688, 1596, 1493, 1448, 1401, 1213, 1172, 1077, 1060, 1015, 1001, 968, 841, 803, 748, 687, 642, 599 cm<sup>-1</sup>. **HRMS (ESI)**  $m/z$  calcd for C<sub>19</sub>H<sub>17</sub>ClNO<sub>3</sub><sup>+</sup> [M+H<sup>+</sup>] 342.0891, found: 342.0889.

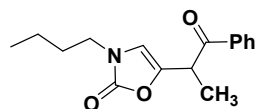

**3-butyl-5-(1-oxo-1-phenylpropan-2-yl) oxazol-2(3H)-one (6ae)**, yellow oil;  $R_f = 0.5$  (EtOAc/petroleum ether = 1:3). <sup>1</sup>H NMR (400 MHz, CDCl<sub>3</sub>)  $\delta$  7.98 (d,  $J = 7.5$  Hz, 2H), 7.60 (t,  $J = 7.7$  Hz, 1H), 7.49 (t,  $J = 7.7$  Hz, 2H), 6.33 (s, 1H), 4.58 (q,  $J = 7.1$  Hz, 1H), 3.50 (h,  $J = 6.7$  Hz, 2H), 1.61 (p,  $J = 7.3$  Hz, 2H), 1.49 (d,  $J = 7.0$  Hz, 3H), 1.32 (q,  $J = 7.5$  Hz, 2H), 0.92 (t,  $J = 7.4$  Hz, 3H). <sup>13</sup>C NMR (101 MHz, CDCl<sub>3</sub>): 197.4, 155.1, 139.0, 135.3, 133.6, 128.8, 128.5, 111.6, 43.6, 38.8, 30.7, 19.6, 15.6, 13.5. **IR:** 2960, 2936, 2874, 1749, 1688, 1596, 1578, 1449, 1403, 1375, 1216, 1177, 1075, 968, 746, 690 cm<sup>-1</sup>. **HRMS (ESI)**  $m/z$  calcd for C<sub>16</sub>H<sub>20</sub>NO<sub>3</sub><sup>+</sup> [M+H<sup>+</sup>] 274.1438, found: 274.1434.

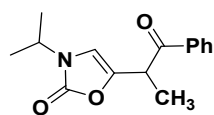

**3-isopropyl-5-(1-oxo-1-phenylpropan-2-yl) oxazol-2(3H)-one (6af)**, yellow oil;  $R_f = 0.5$  (EtOAc/petroleum ether = 1:3). <sup>1</sup>H NMR (400 MHz, CDCl<sub>3</sub>)  $\delta$  7.90 (d,  $J = 7.0$  Hz, 2H), 7.51 (t,  $J = 7.4$  Hz, 1H), 7.40 (t,  $J = 7.6$  Hz, 2H), 6.32 (s, 1H), 4.51 (q,  $J = 7.1$  Hz, 1H), 4.12 (p,  $J = 6.7$  Hz, 1H), 1.40 (d,  $J = 7.1$  Hz, 3H), 1.19 (dd,  $J = 9.5, 6.7$  Hz, 6H). <sup>13</sup>C NMR (101 MHz, CDCl<sub>3</sub>): 197.5, 154.4, 139.1, 135.3, 133.5, 129.8, 128.7, 128.5, 108.2, 45.7, 38.7, 21.3, 15.6. **IR:** 3133, 2980, 2937, 2879, 1736,

1680, 1649, 1449, 1390, 1373, 1275, 1215, 1175, 1133, 1097, 1034, 1001, 967, 932, 886, 749, 725, 689, 656  $\text{cm}^{-1}$ . **HRMS (ESI)**  $m/z$  calcd for  $\text{C}_{15}\text{H}_{18}\text{NO}_3^+$   $[\text{M}+\text{H}^+]$  260.1281, found: 260.1278.

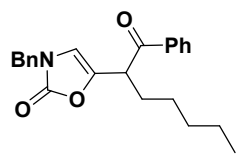

**3-benzyl-5-(1-oxo-1-phenylheptan-2-yl) oxazol-2(3H)-one (6ag)**, yellow oil;  $R_f = 0.5$  (EtOAc/petroleum ether = 1:3).  **$^1\text{H}$  NMR** (400 MHz,  $\text{CDCl}_3$ )  $\delta$  7.86 (d,  $J = 7.5$  Hz, 2H), 7.51 (t,  $J = 7.4$  Hz, 1H), 7.39 (t,  $J = 7.6$  Hz, 2H), 7.25 (d,  $J = 7.4$  Hz, 3H), 7.19 – 7.11 (m, 2H), 6.19 (s, 1H), 4.65 – 4.52 (m, 2H), 4.38 (t,  $J = 7.0$  Hz, 1H), 1.88 (dt,  $J = 14.5, 7.1$  Hz, 1H), 1.72 (dt,  $J = 14.2, 7.0$  Hz, 1H), 1.18 (s, 6H), 0.79 – 0.71 (m, 3H).  **$^{13}\text{C}$  NMR** (101 MHz,  $\text{CDCl}_3$ ):  $\delta$  197.2, 155.2, 138.5, 136.0, 135, 133.6, 128.9, 128.8, 128.5, 128.2, 127.8, 111.7, 47.6, 44.3, 31.5, 30.9, 26.7, 22.3, 13.9. **IR**: 2955, 2928, 2858, 1753, 1686, 1595, 1580, 1497, 1447, 1401, 1364, 1224, 1158, 1067, 1029, 1001, 965, 908, 737, 702  $\text{cm}^{-1}$ . **HRMS (ESI)**  $m/z$  calcd for  $\text{C}_{23}\text{H}_{26}\text{NO}_3^+$   $[\text{M}+\text{H}^+]$  364.1907, found: 364.1903.

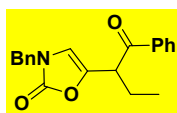

**3-benzyl-5-(1-oxo-1-phenylbutan-2-yl) oxazol-2(3H)-one (6ah)**, pale yellow solid, m.p. 104–105  $^\circ\text{C}$ .  $R_f = 0.4$  (EtOAc/petroleum ether = 1:3).  **$^1\text{H}$  NMR** (400 MHz,  $\text{CDCl}_3$ )  $\delta$  7.95 (d,  $J = 7.8$  Hz, 2H), 7.58 (d,  $J = 7.4$  Hz, 1H), 7.47 (t,  $J = 7.6$  Hz, 2H), 7.37 – 7.19 (m, 5H), 6.31 (s, 1H), 4.72 – 4.60 (m, 2H), 4.41 (t,  $J = 6.9$  Hz, 1H), 1.94 (ddq,  $J = 55.0, 14.0, 7.1$  Hz, 2H), 0.92 (t,  $J = 7.4$  Hz, 3H).  **$^{13}\text{C}$  NMR** (101 MHz,  $\text{CDCl}_3$ ):  $\delta$  197.1, 155.2, 138.2, 135.9, 135.2, 133.5, 128.9, 128.7, 128.4, 128.2, 127.8, 111.9, 47.6, 45.7, 24.1, 11.5. **IR**: 2968, 2934, 2877, 1750, 1684, 1596, 1580, 1559, 1497, 1401, 1363, 1261, 1211, 1179, 1065, 965, 748, 703  $\text{cm}^{-1}$ . **HRMS (ESI)**  $m/z$  calcd for  $\text{C}_{20}\text{H}_{20}\text{NO}_3^+$   $[\text{M}+\text{H}^+]$  322.1438, found: 322.1439.

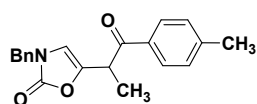

**3-benzyl-5-(1-oxo-1-(p-tolyl)propan-2-yl) oxazol-2(3H)-one (6ai)**, yellow oil;  $R_f = 0.5$  (EtOAc/petroleum ether = 1:3).  **$^1\text{H}$  NMR** (400 MHz,  $\text{CDCl}_3$ ):  $\delta$  7.87 (d,  $J = 8.2$  Hz, 2H), 7.29 (dt,  $J = 15.7, 7.4$  Hz, 7H), 6.28 (s, 1H), 4.66 (dd,  $J = 33.4, 15.1$  Hz, 2H), 4.54 (q,  $J = 7.1$  Hz, 1H), 2.41 (s, 3H), 1.44 (d,  $J = 7.1$  Hz, 3H).  **$^{13}\text{C}$  NMR** (101 MHz,  $\text{CDCl}_3$ ): 196.9, 155.1, 144.5, 139.4, 135.2, 132.7, 129.3, 128.8, 128.6, 128.5, 128.1, 127.8, 111.3, 111.2, 47.5, 38.6, 21.5, 15.5. **IR**: 3035, 2982,

2935, 1752, 1682, 1606, 1454., 1401, 1366, 1276, 1226, 1206, 1180, 1057, 966, 749, 703  $\text{cm}^{-1}$ . **HRMS (ESI)**  $m/z$  calcd for  $\text{C}_{20}\text{H}_{20}\text{NO}_3^+$   $[\text{M}+\text{H}^+]$  322.1438, found: 322.1434.

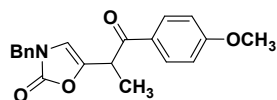

**3-benzyl-5-(1-(4-methoxyphenyl)-1-oxopropan-2-yl) oxazol-2(3H)-one (6aj)**, yellow oil;  $R_f = 0.5$  (EtOAc/petroleum ether = 1:3).  **$^1\text{H NMR}$**  (400 MHz,  $\text{CDCl}_3$ ):  $\delta$  7.95 (d,  $J = 8.7$  Hz, 2H), 7.38 – 7.30 (m, 3H), 7.25 (d,  $J = 7.1$  Hz, 2H), 6.94 (d,  $J = 8.7$  Hz, 2H), 6.27 (s, 1H), 4.67 (dd,  $J = 34.8, 15.1$  Hz, 2H), 4.52 (q,  $J = 6.9$  Hz, 1H), 3.87 (s, 3H), 1.43 (d,  $J = 7.0$  Hz, 3H).  **$^{13}\text{C NMR}$**  (101 MHz,  $\text{CDCl}_3$ ): 195.8, 163.8, 155.1, 139.6, 135.2, 130.9, 128.8, 128.2, 127.8, 113.9, 111.2, 55.4, 47.5, 38.3, 15.5. **IR**: 3137, 2952, 2936, 2842, 1750, 1678, 1599, 1573, 1510, 1455, 1401, 1260, 1170, 1028, 967, 844, 750, 703  $\text{cm}^{-1}$ . **HRMS (ESI)**  $m/z$  calcd for  $\text{C}_{20}\text{H}_{20}\text{NO}_4^+$   $[\text{M}+\text{H}^+]$  338.1387, found: 338.1383.

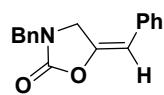

**(E)-3-benzyl-5-benzylideneoxazolidin-2-one (3'aa)**, white solid; m.p. 156-158  $^\circ\text{C}$ .  $R_f = 0.5$  (EtOAc/petroleum ether = 1:2).  **$^1\text{H NMR}$**  (400 MHz,  $\text{CDCl}_3$ )  $\delta$  7.58 (d,  $J = 7.7$  Hz, 2H), 7.43-7.31 (m, 8H), 7.24 (t,  $J = 7.4$  Hz, 1H), 5.48 (s, 1H), 4.55 (s, 2H), 4.19 (s, 2H).  **$^{13}\text{C NMR}$**  (101 MHz,  $\text{CDCl}_3$ ): 155.5, 141.7, 134.8, 133.3, 128.9, 128.4, 128.2, 128.1, 126.8, 103.1, 48.1, 47.8. **IR**: 3085, 3061, 3027, 1770, 1695, 1546, 1494, 1471, 1450, 1440, 1427, 1390, 1350, 1329, 1266, 1047, 937, 921, 908, 818, 747, 704, 664, 566  $\text{cm}^{-1}$ . **HRMS (ESI)**  $m/z$  calcd for  $\text{C}_{17}\text{H}_{16}\text{NO}_2^+$   $[\text{M}+\text{H}^+]$  266.1176, found: 266.1173.

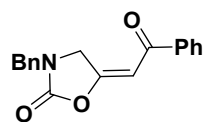

**(E)-3-benzyl-5-(2-oxo-2-phenylethylidene) oxazolidin-2-one (4aa)**, white solid, m.p. 145-147  $^\circ\text{C}$ ,  $R_f = 0.6$  (EtOAc/petroleum ether = 1:2).  **$^1\text{H NMR}$**  (400 MHz,  $\text{CDCl}_3$ )  $\delta$  7.88 (d,  $J = 7.3$  Hz, 2H), 7.56 (t,  $J = 7.4$  Hz, 1H), 7.47 (t,  $J = 7.6$  Hz, 2H), 7.41 – 7.30 (m, 5H), 6.86 (t,  $J = 2.5$  Hz, 1H), 4.64 (d,  $J = 2.4$  Hz, 2H), 4.55 (s, 2H).  **$^{13}\text{C NMR}$**  (101 MHz,  $\text{CDCl}_3$ ): 190.0, 163.1, 153.6, 137.8, 134.4, 133.0, 129.1, 128.7, 128.5, 128.4, 127.8, 98.5, 50.8, 48.0. **IR**: 1781, 1742, 1677, 1605, 1573, 1494, 1447, 1416, 1388, 1364, 1332, 1301, 1273, 1226, 1205, 1190, 1149, 1081, 1059, 1012, 887, 831, 758, 748, 698, 677, 633, 591, 544  $\text{cm}^{-1}$ . **HRMS (ESI)**  $m/z$  calcd for  $\text{C}_{18}\text{H}_{16}\text{NO}_3^+$   $[\text{M}+\text{H}^+]$  294.1125, found: 294.1120.

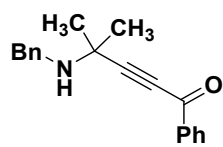

**4-(benzylamino)-4-methyl-1-phenylpent-2-yn-1-one (3na'),**

yellow oil,  $R_f = 0.6$  (EtOAc/petroleum ether = 1:5).  $^1\text{H NMR}$  (400 MHz,  $\text{CDCl}_3$ )  $\delta$  8.16 (d,  $J = 8.1$  Hz, 2H), 7.65 – 7.60 (m, 1H), 7.52 – 7.47 (m, 2H), 7.41 – 7.23 (m, 6H), 3.98 (s, 2H), 1.57 (s, 6H).  $^{13}\text{C NMR}$  (101 MHz,  $\text{CDCl}_3$ ): 178.0, 140.0, 136.9, 134.0, 129.5, 128.6, 128.5, 128.3, 127.2, 99.6, 80.6, 50.6, 49.2, 29.0.

## 7. $^1\text{H}$ and $^{13}\text{C}$ Spectra of all Products

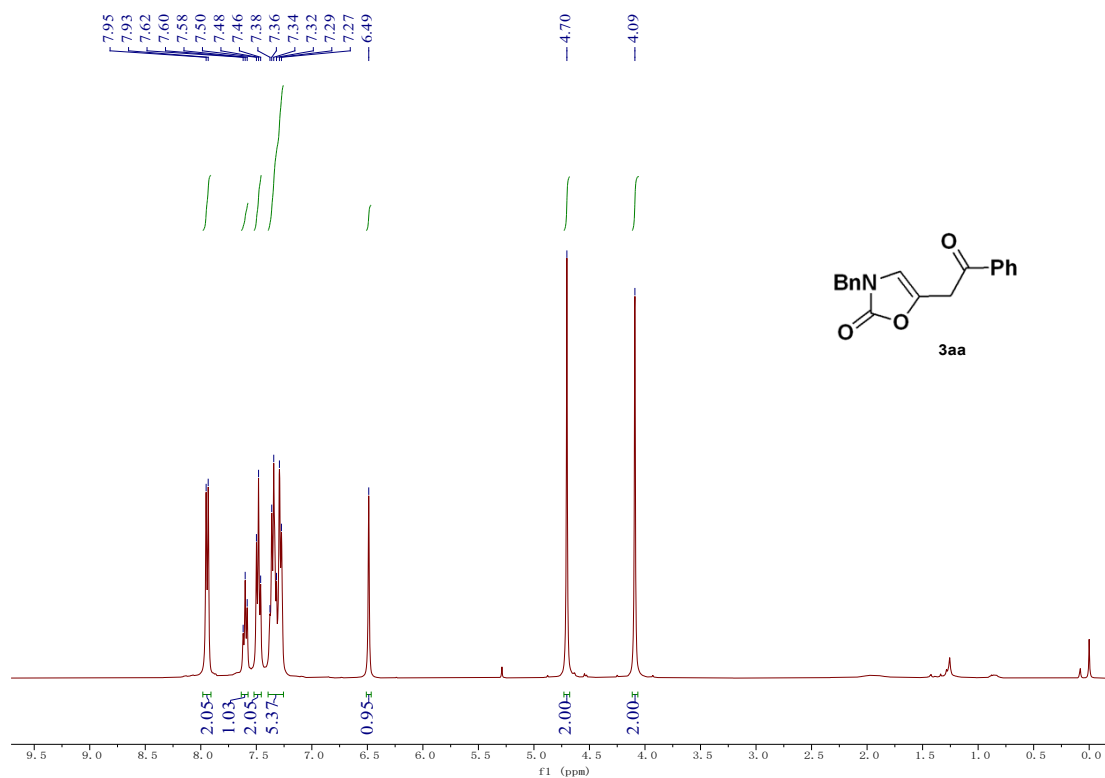

$^1\text{H}$  NMR (400 MHz,  $\text{CDCl}_3$ )

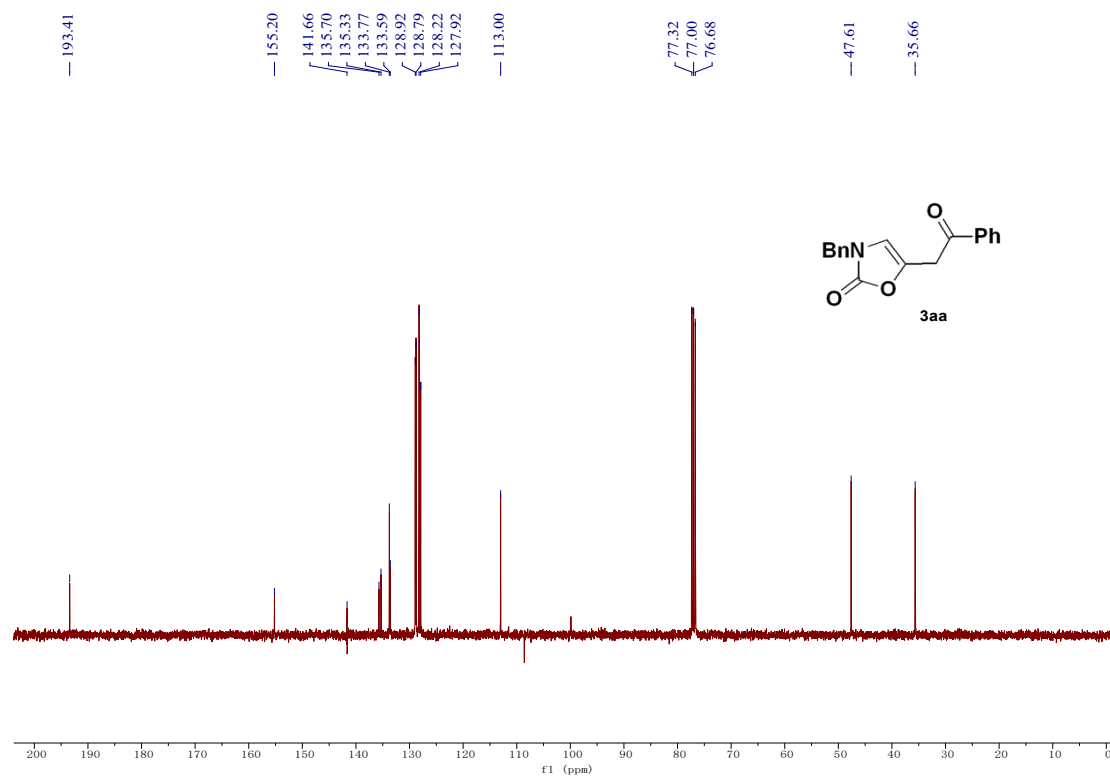

$^{13}\text{C}$  NMR (101 MHz,  $\text{CDCl}_3$ )

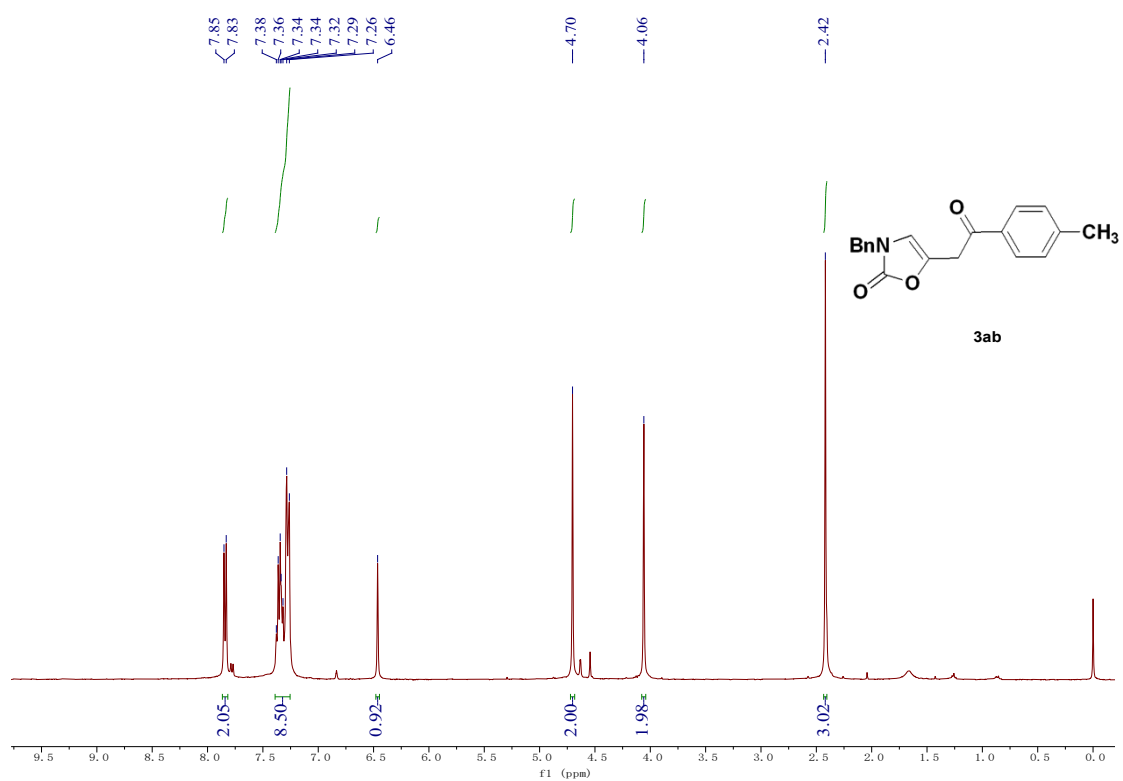

<sup>1</sup>H NMR (400 MHz, CDCl<sub>3</sub>)

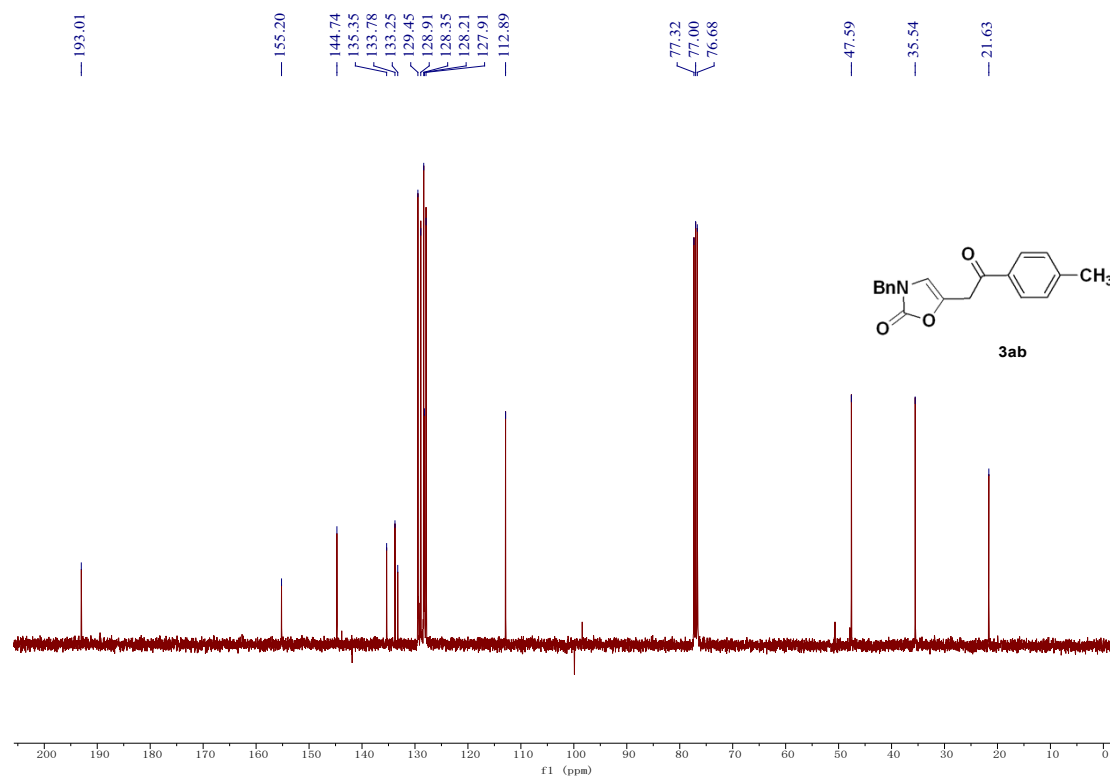

<sup>13</sup>C NMR (101 MHz, CDCl<sub>3</sub>)



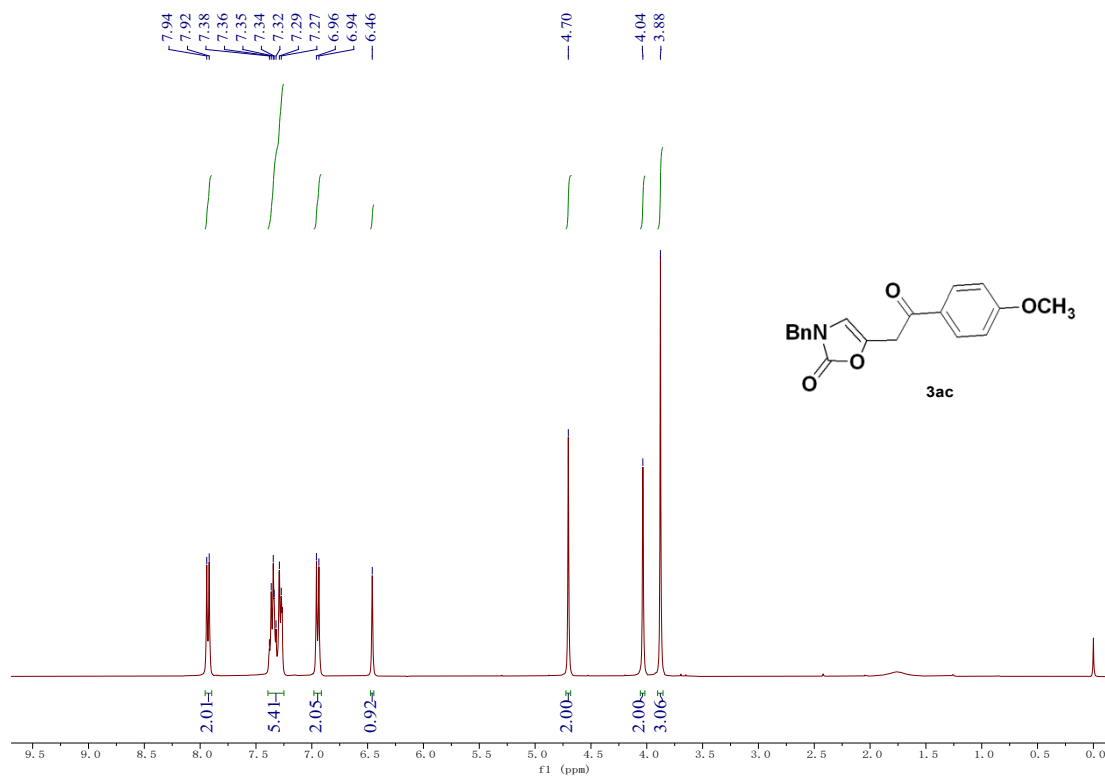

$^1\text{H}$  NMR (400 MHz,  $\text{CDCl}_3$ )

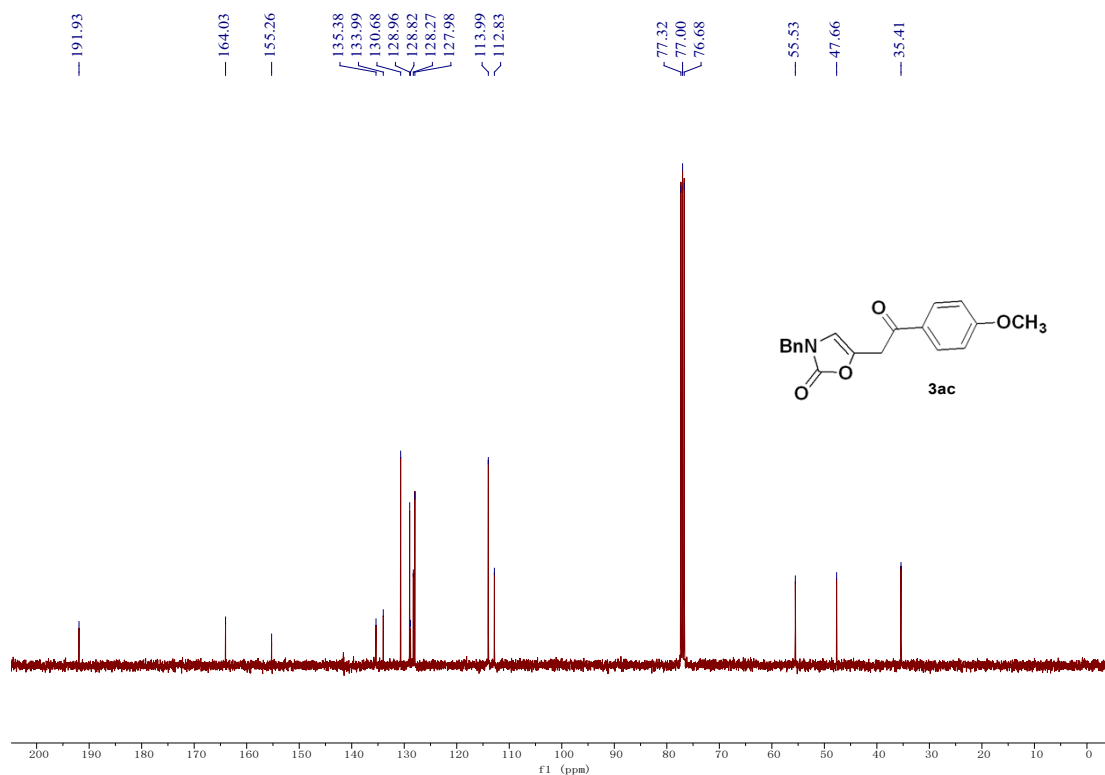

$^{13}\text{C}$  NMR (101 MHz,  $\text{CDCl}_3$ )

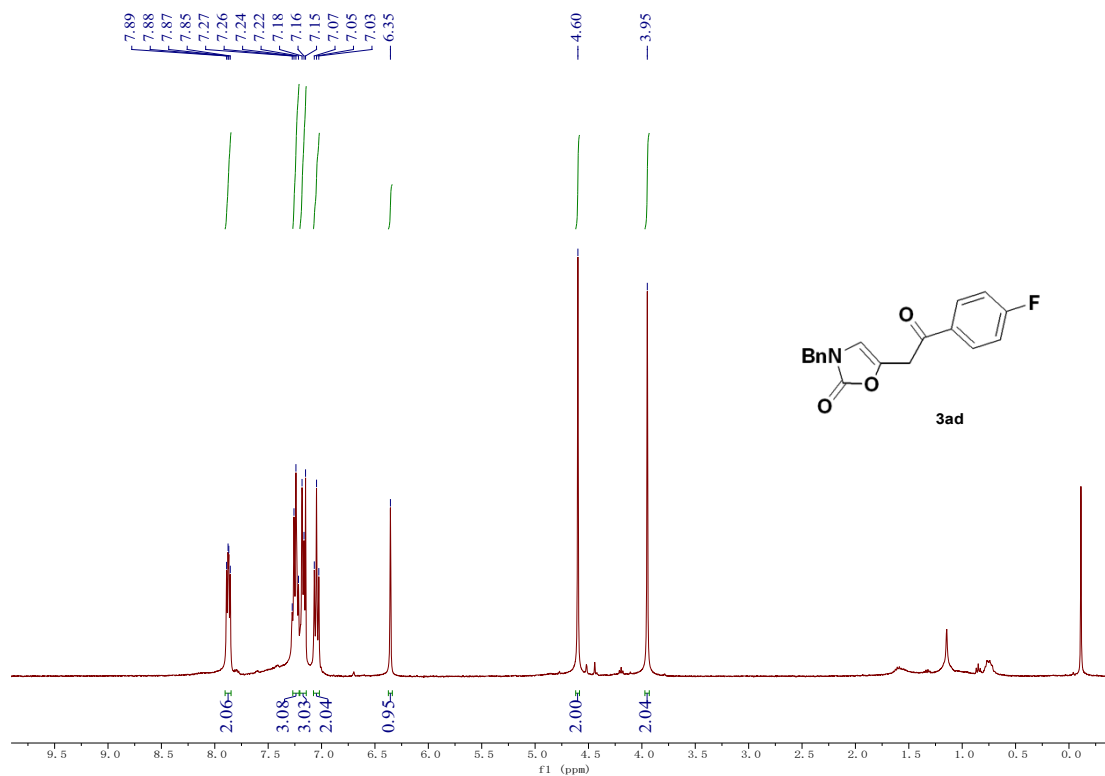

$^1\text{H}$  NMR (400 MHz,  $\text{CDCl}_3$ )

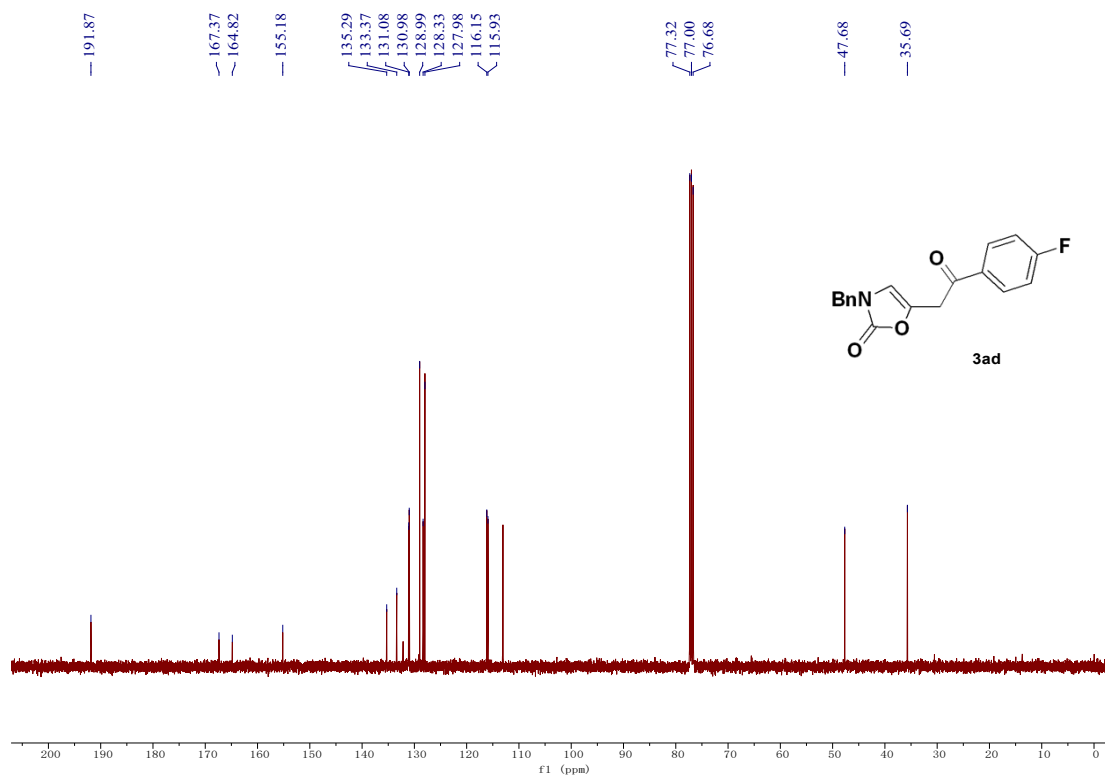

$^{13}\text{C}$  NMR (101 MHz,  $\text{CDCl}_3$ )

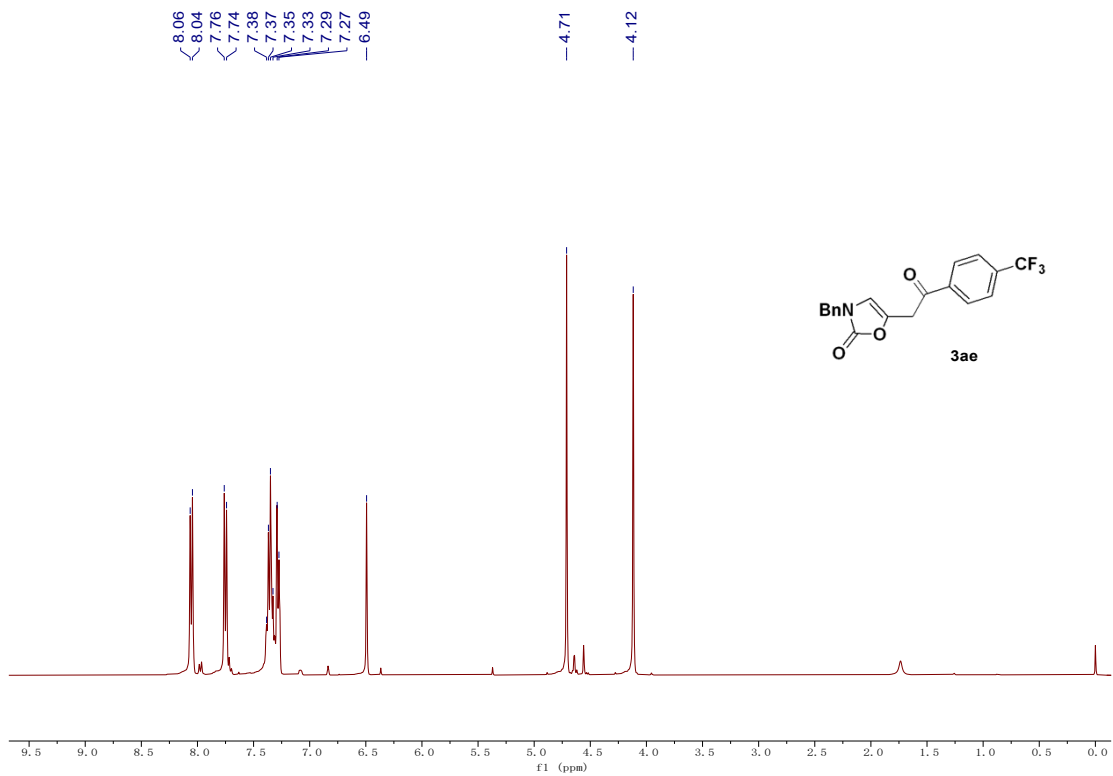

<sup>1</sup>H NMR (400 MHz, CDCl<sub>3</sub>)

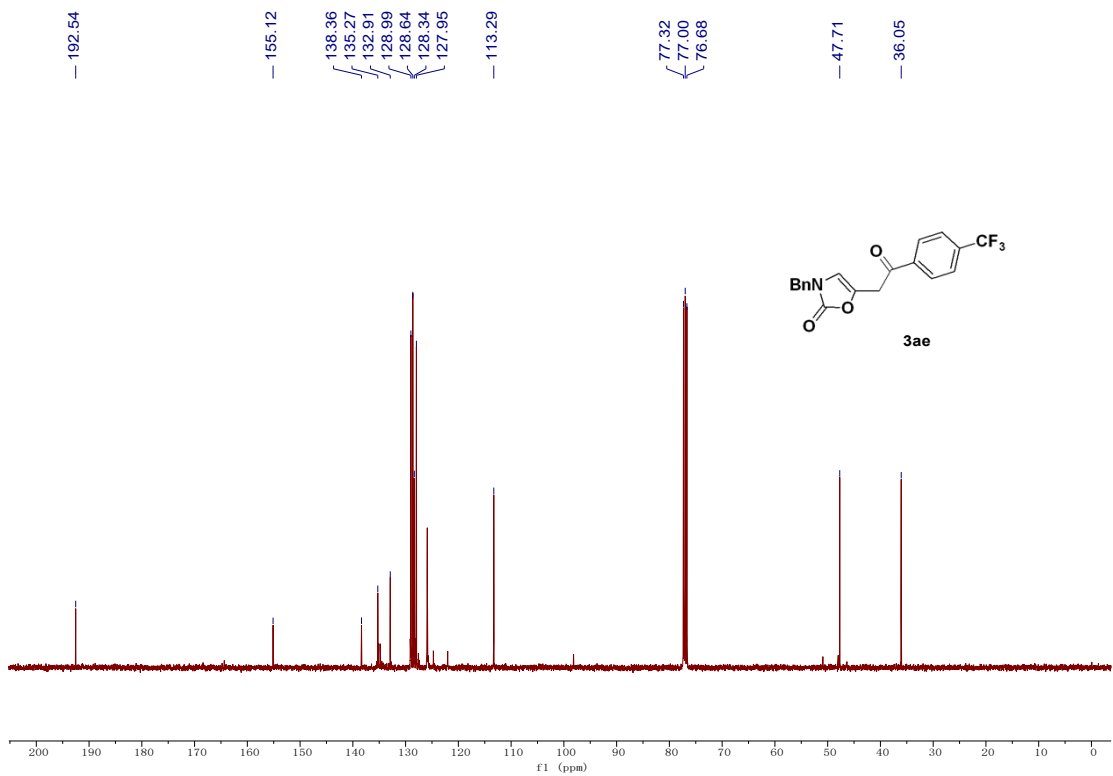

<sup>13</sup>C NMR (101 MHz, CDCl<sub>3</sub>)

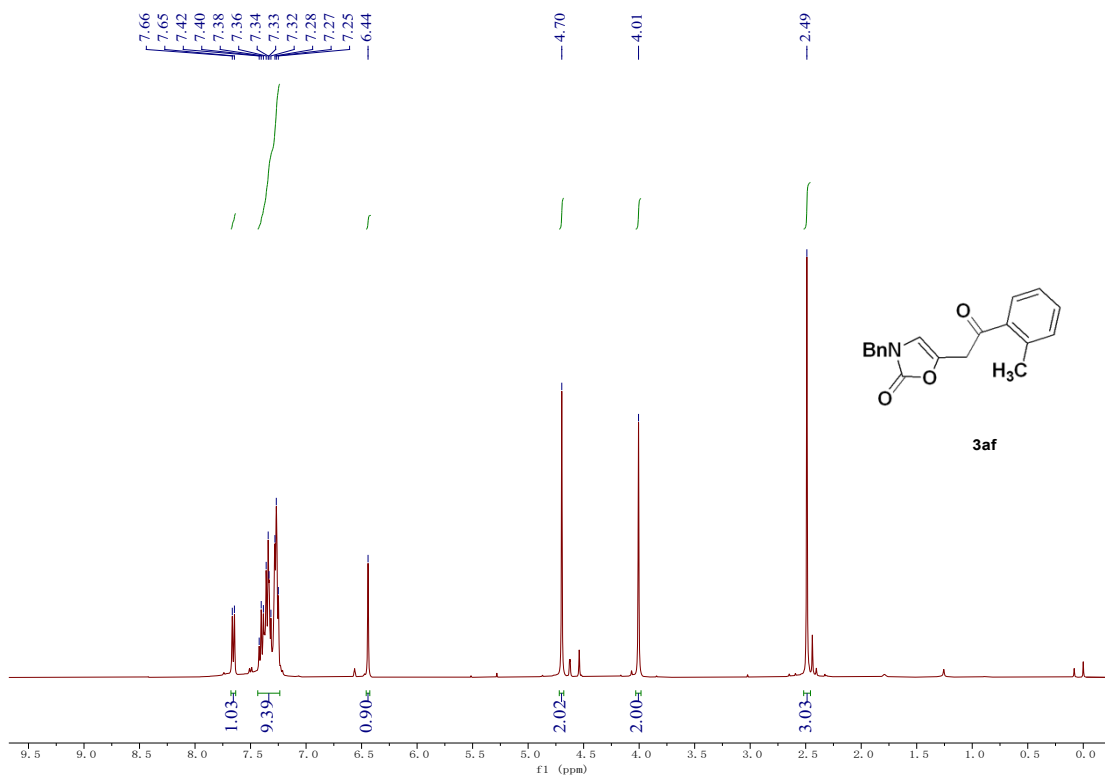

<sup>1</sup>H NMR (400 MHz, CDCl<sub>3</sub>)

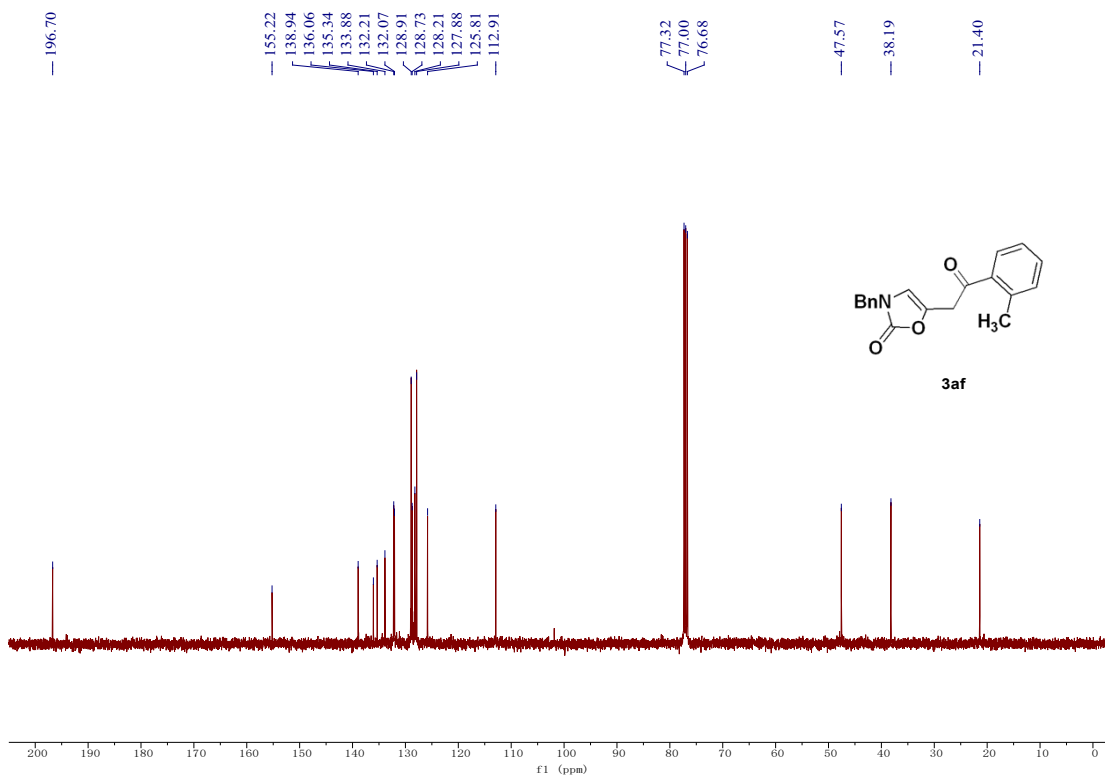

<sup>13</sup>C NMR (101 MHz, CDCl<sub>3</sub>)

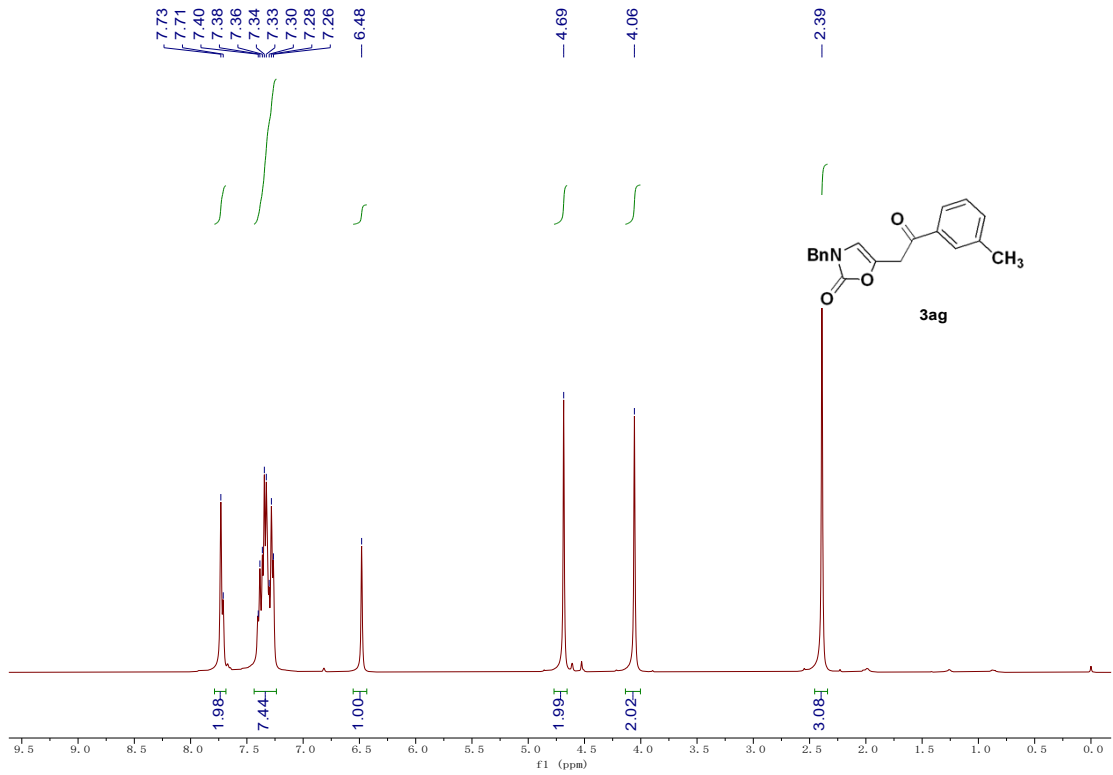

$^1\text{H NMR}$  (400 MHz,  $\text{CDCl}_3$ )

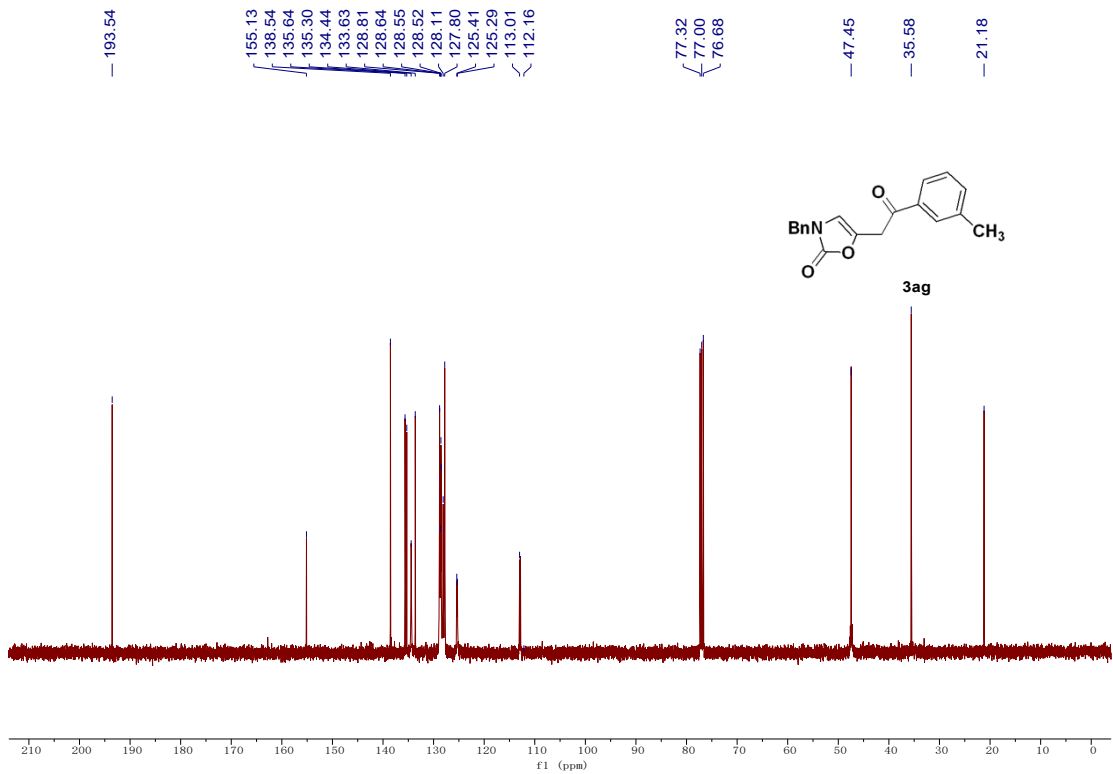

$^{13}\text{C NMR}$  (101 MHz,  $\text{CDCl}_3$ )

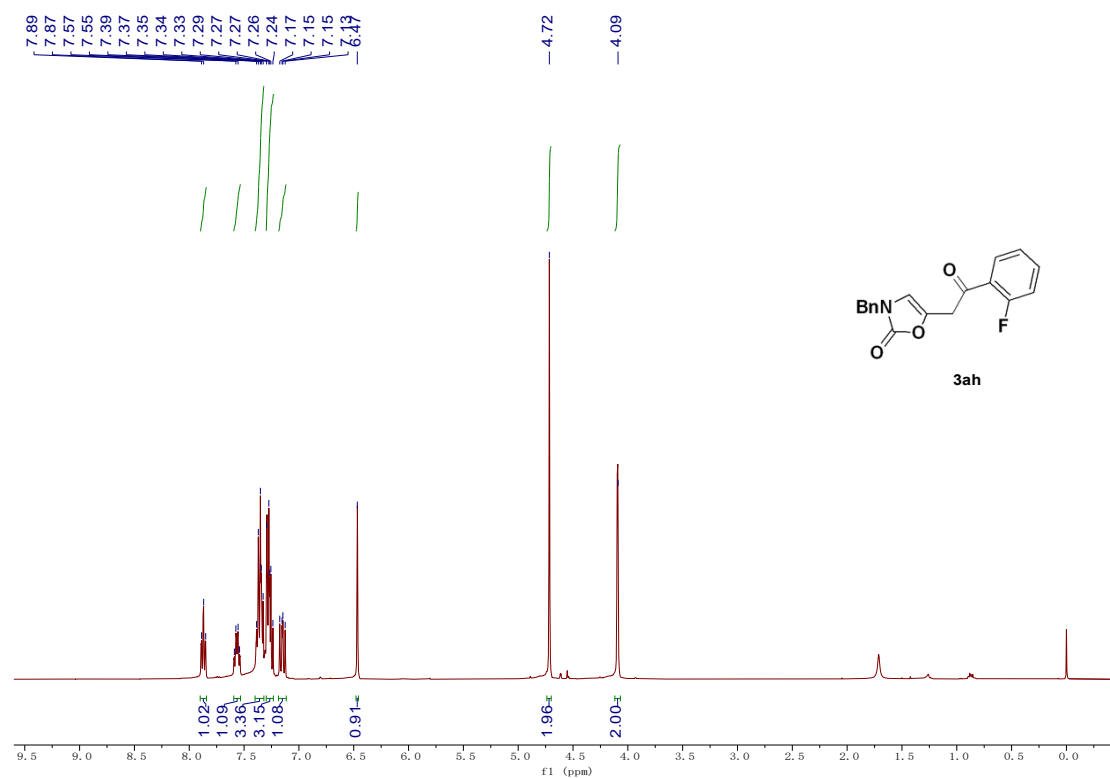

<sup>1</sup>H NMR (400 MHz, CDCl<sub>3</sub>)

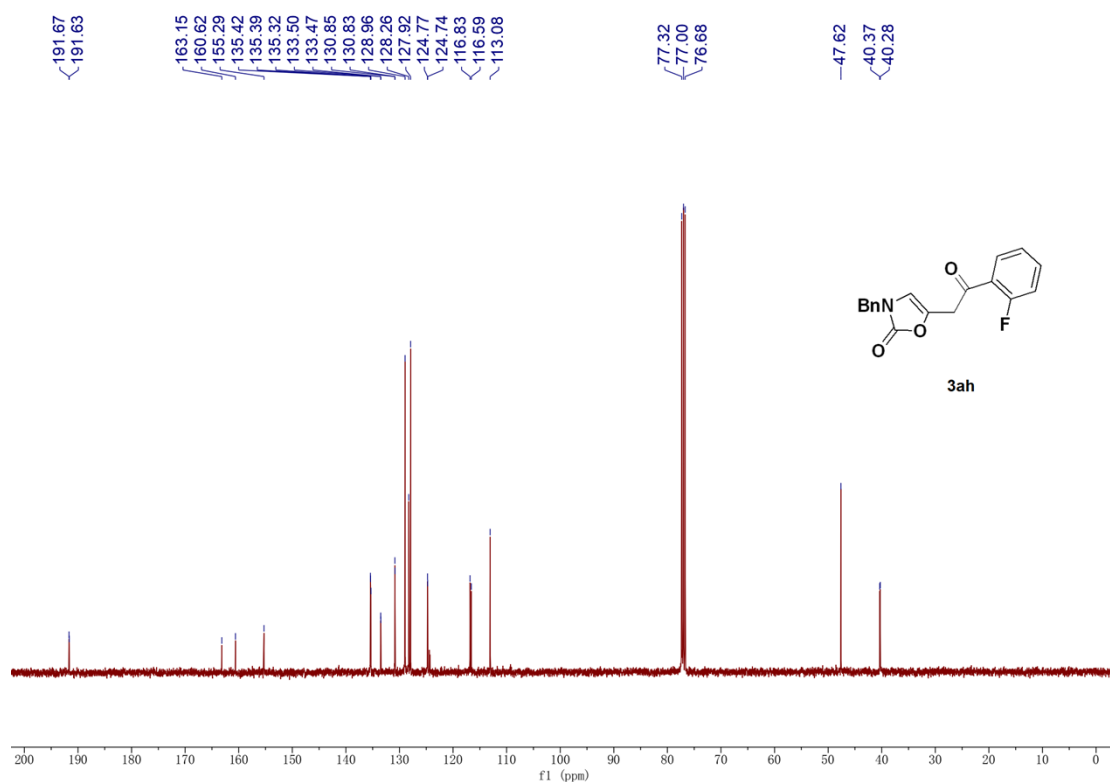

<sup>13</sup>C NMR (101 MHz, CDCl<sub>3</sub>)

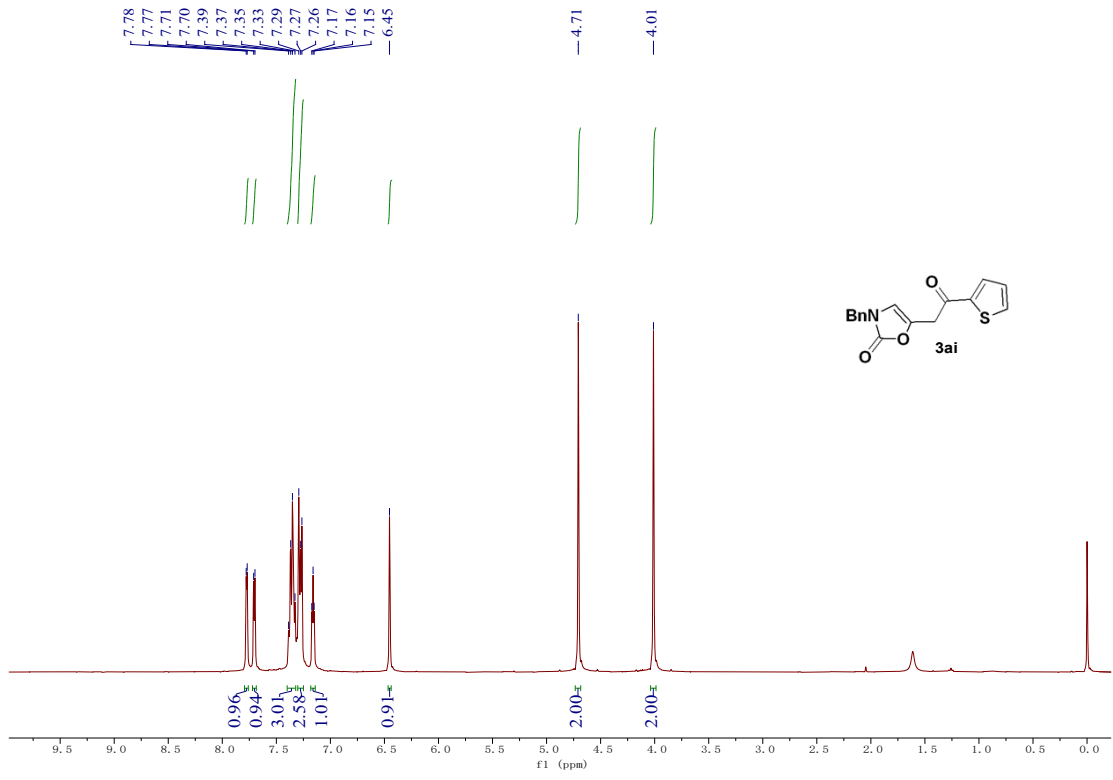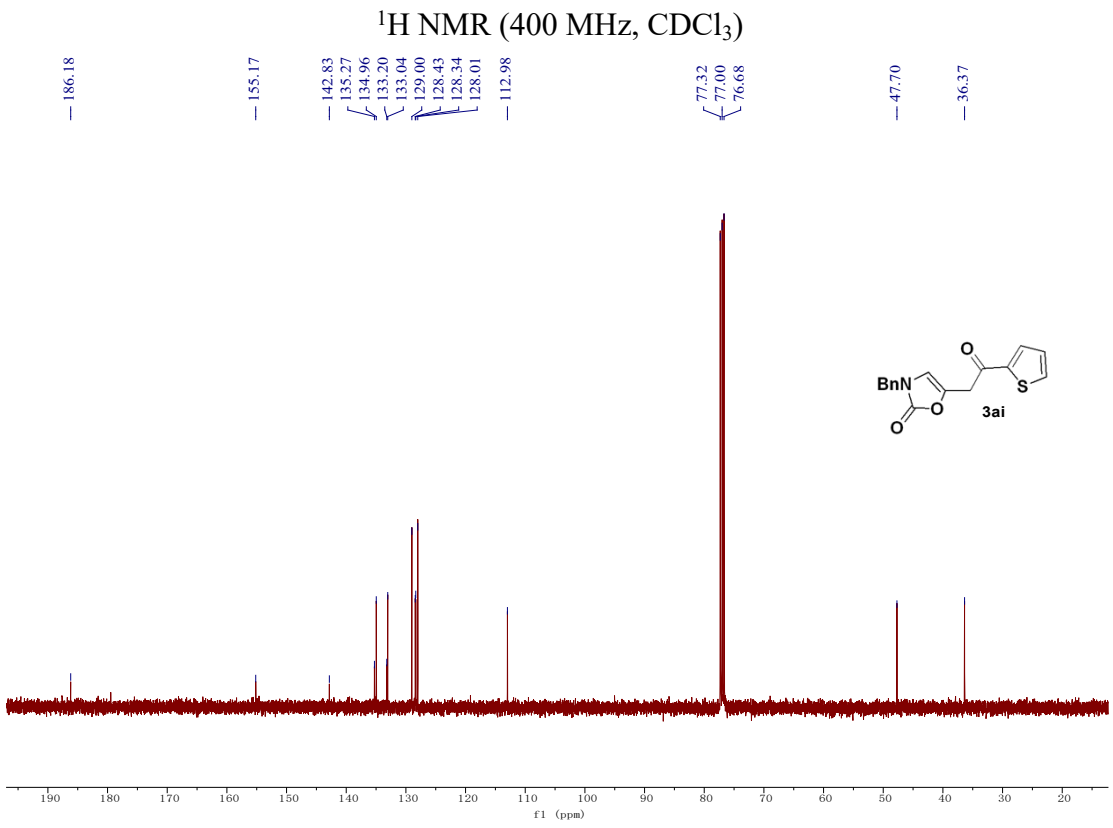

<sup>13</sup>C NMR (101 MHz, CDCl<sub>3</sub>)

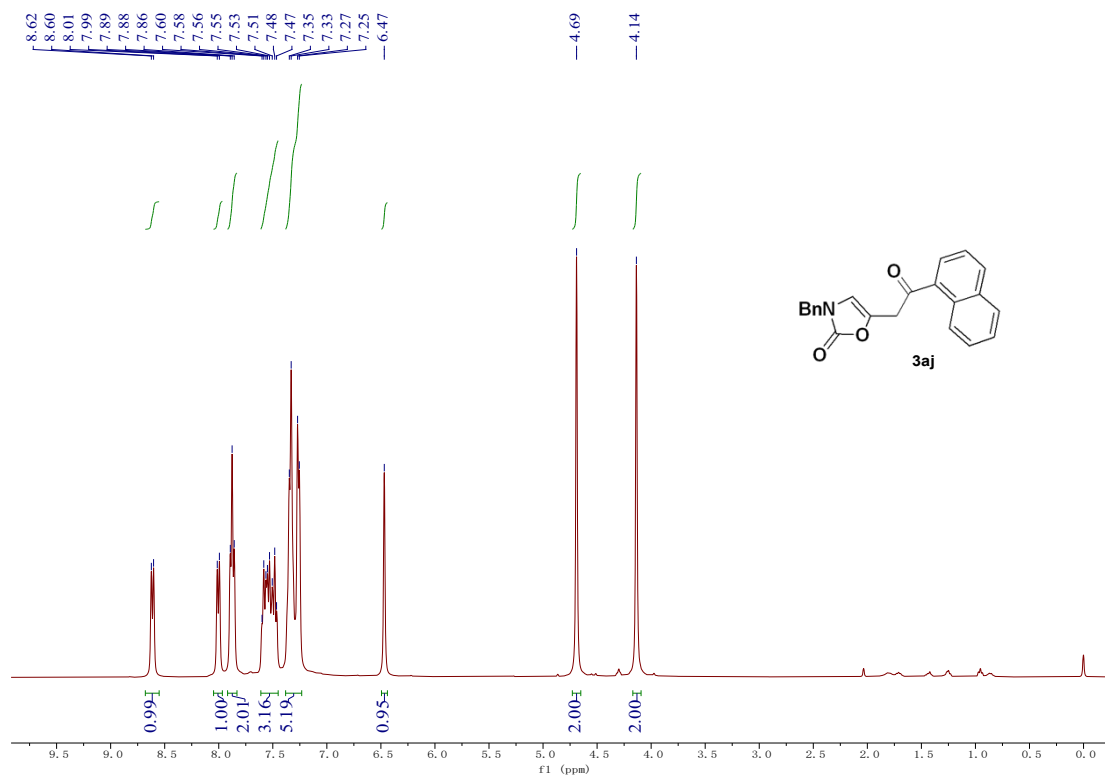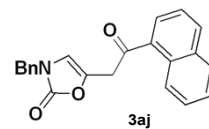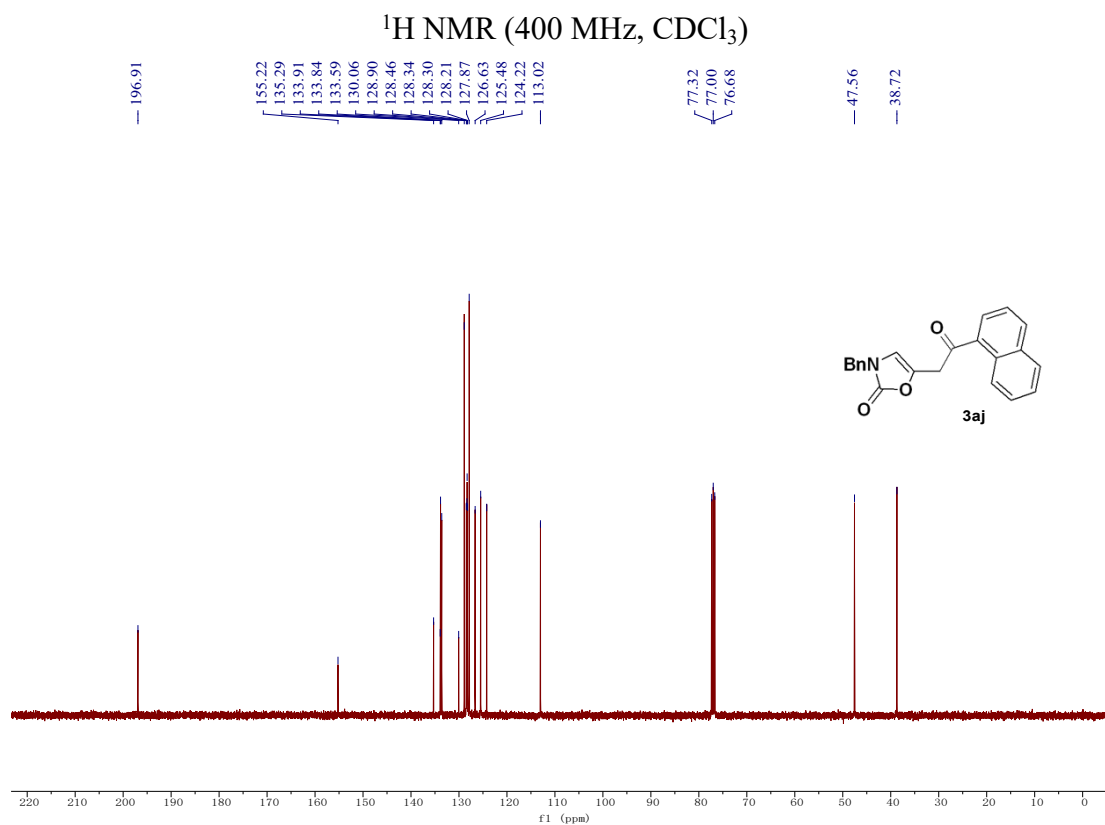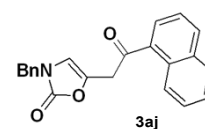



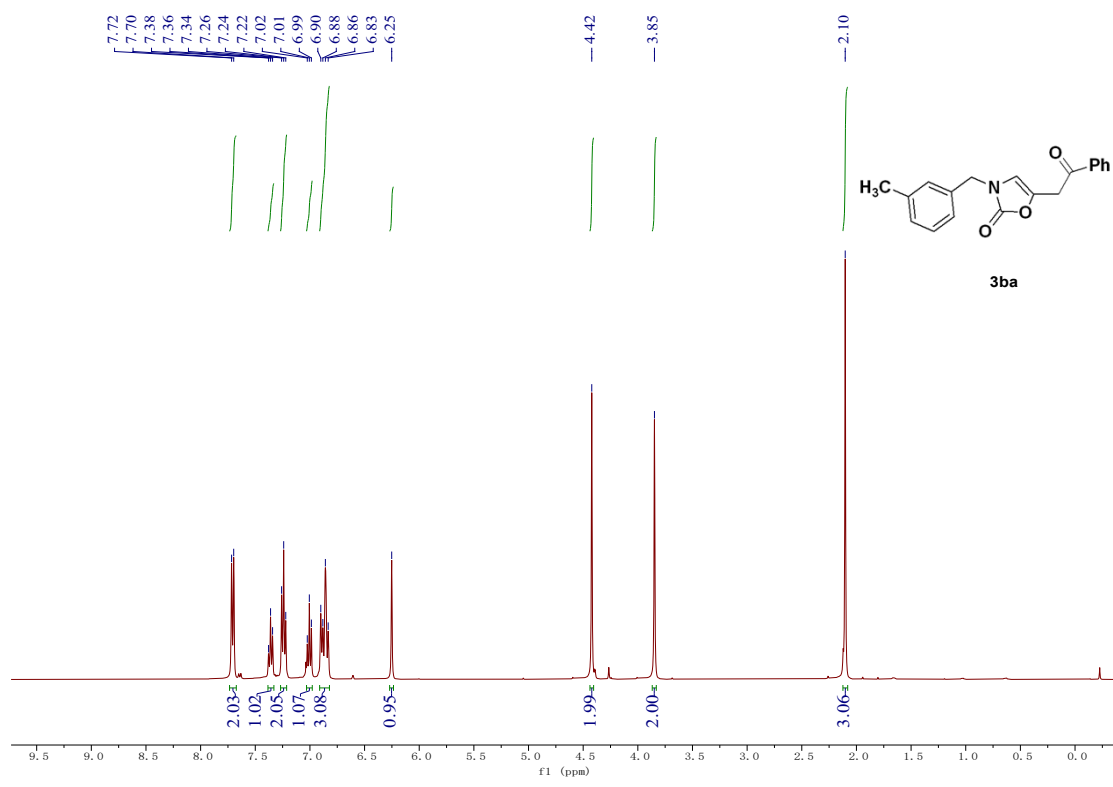

<sup>1</sup>H NMR (400 MHz, CDCl<sub>3</sub>)

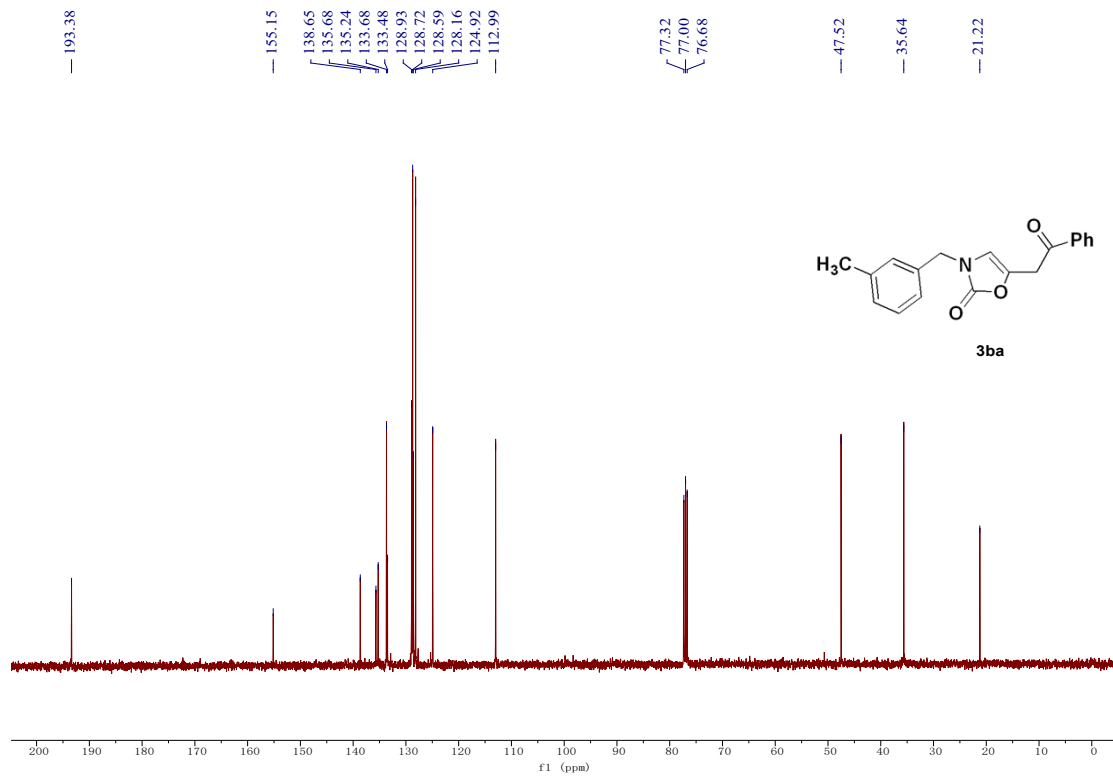

<sup>13</sup>C NMR (101 MHz, CDCl<sub>3</sub>)

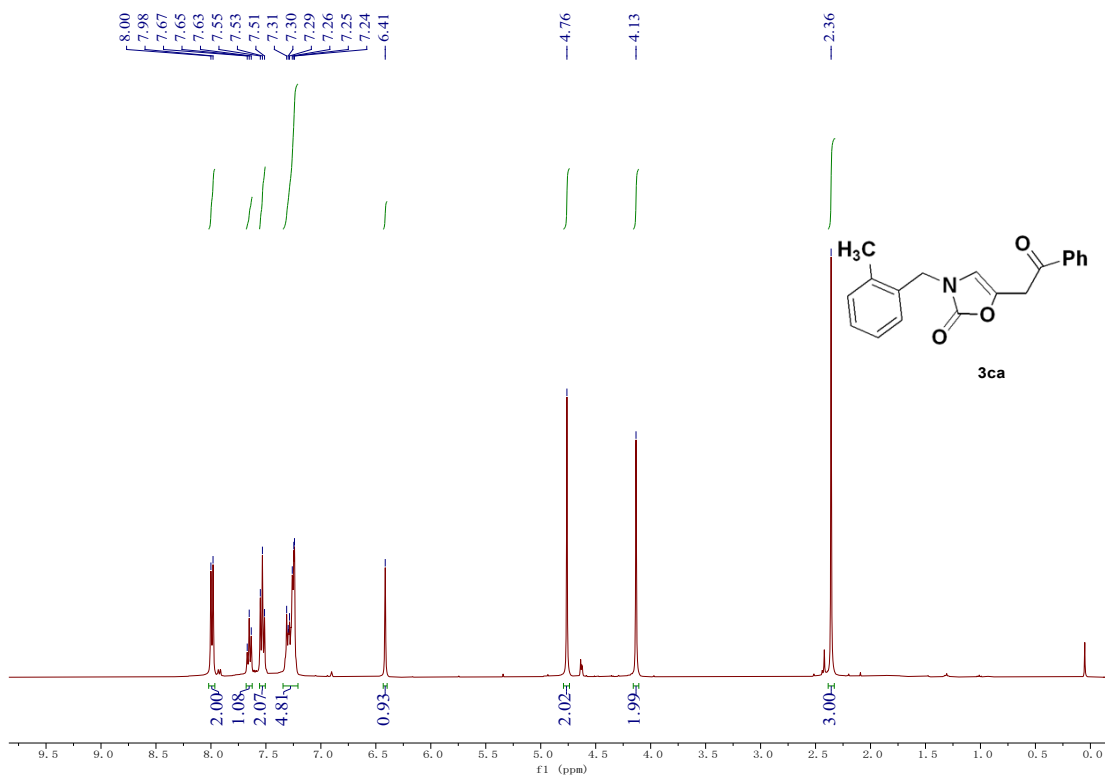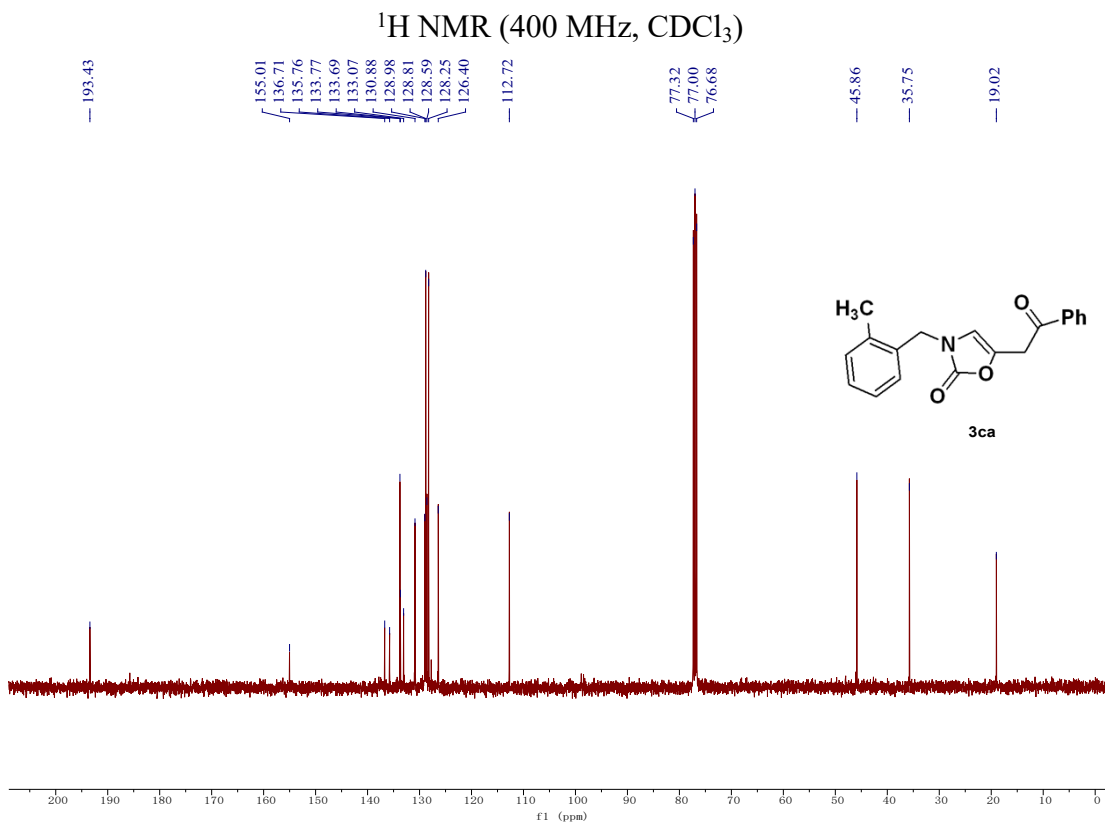

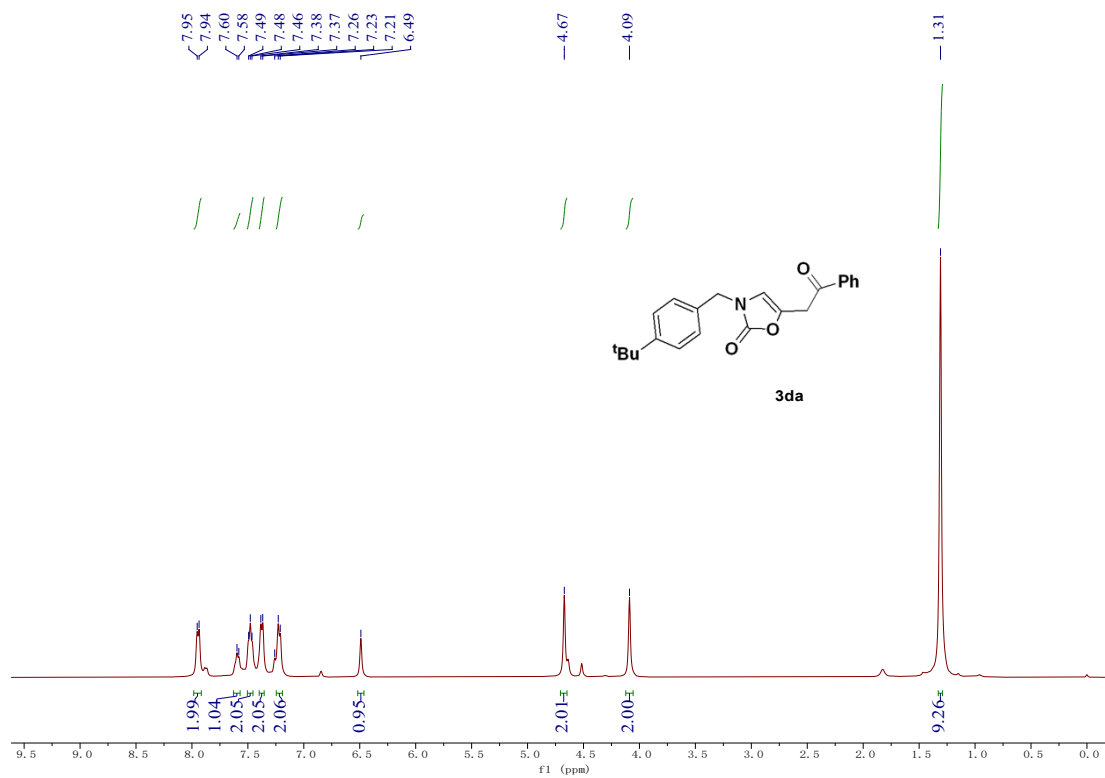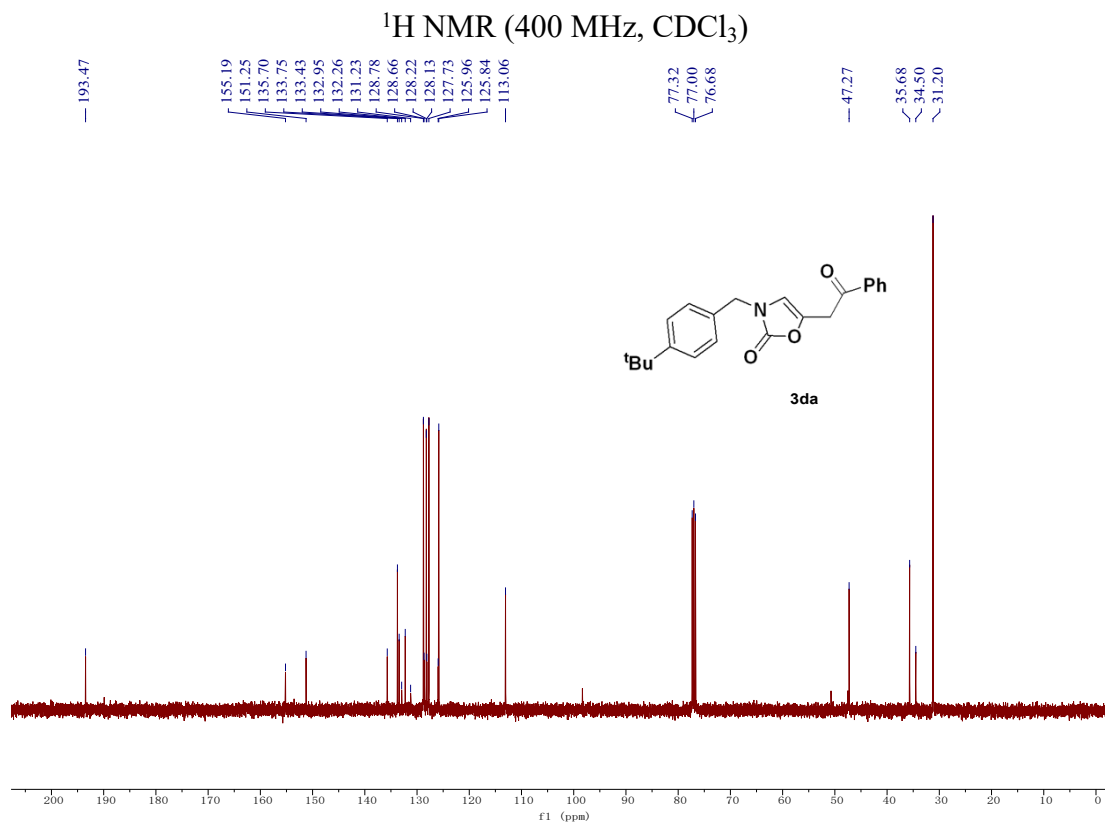

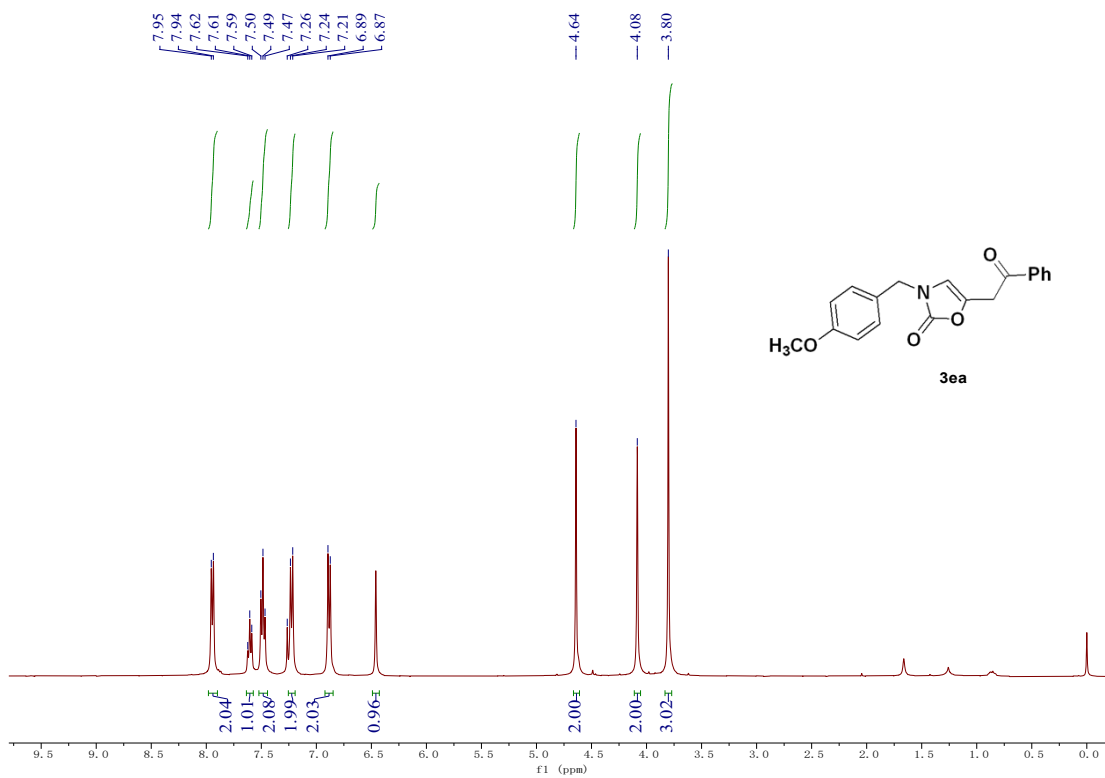

$^1\text{H NMR}$  (400 MHz,  $\text{CDCl}_3$ )

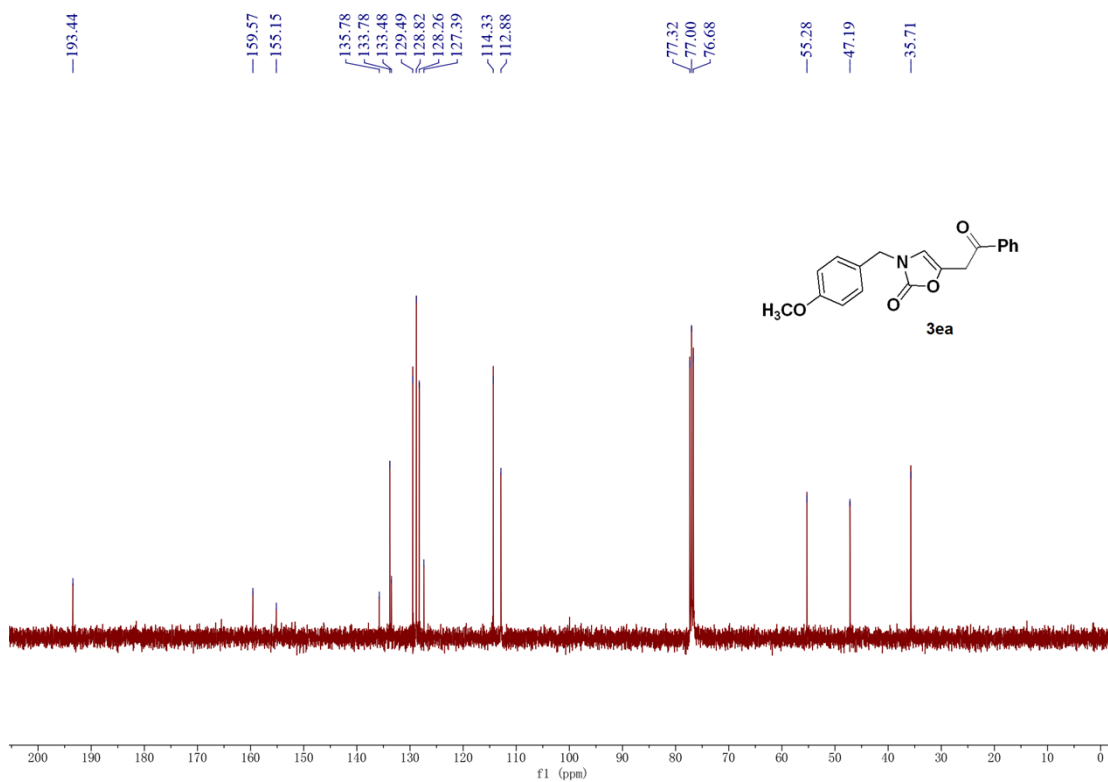

$^{13}\text{C NMR}$  (101 MHz,  $\text{CDCl}_3$ )

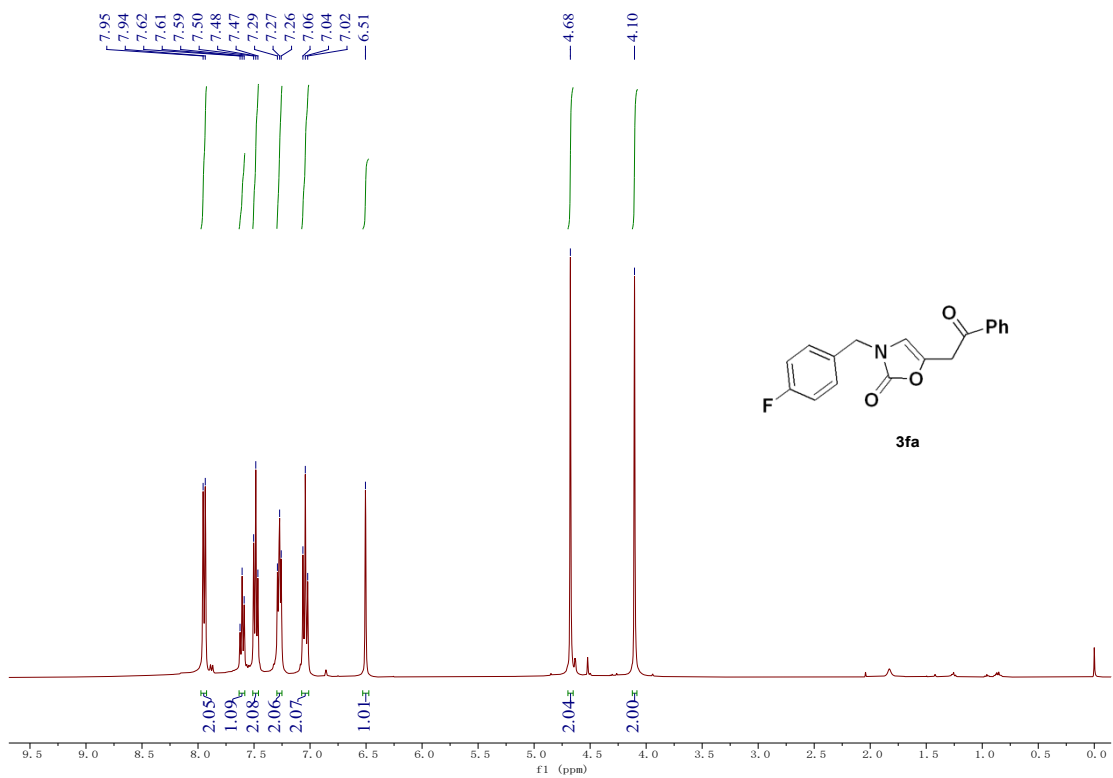

<sup>1</sup>H NMR (400 MHz, CDCl<sub>3</sub>)

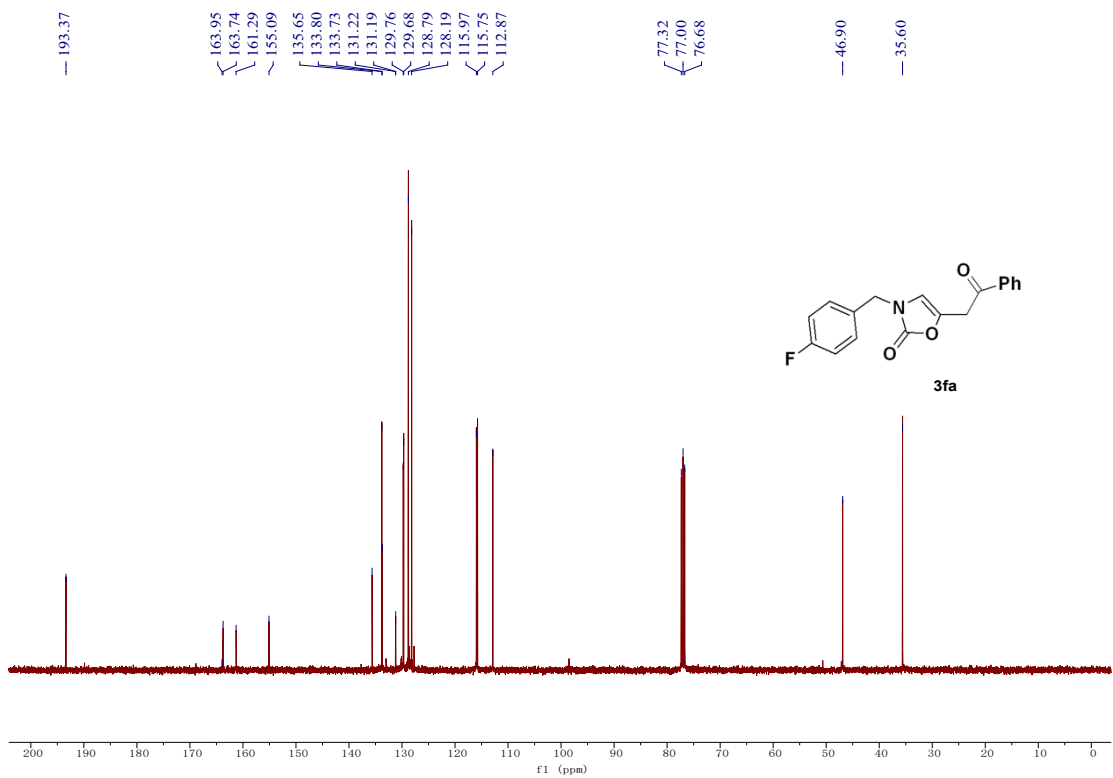

<sup>13</sup>C NMR (101 MHz, CDCl<sub>3</sub>)

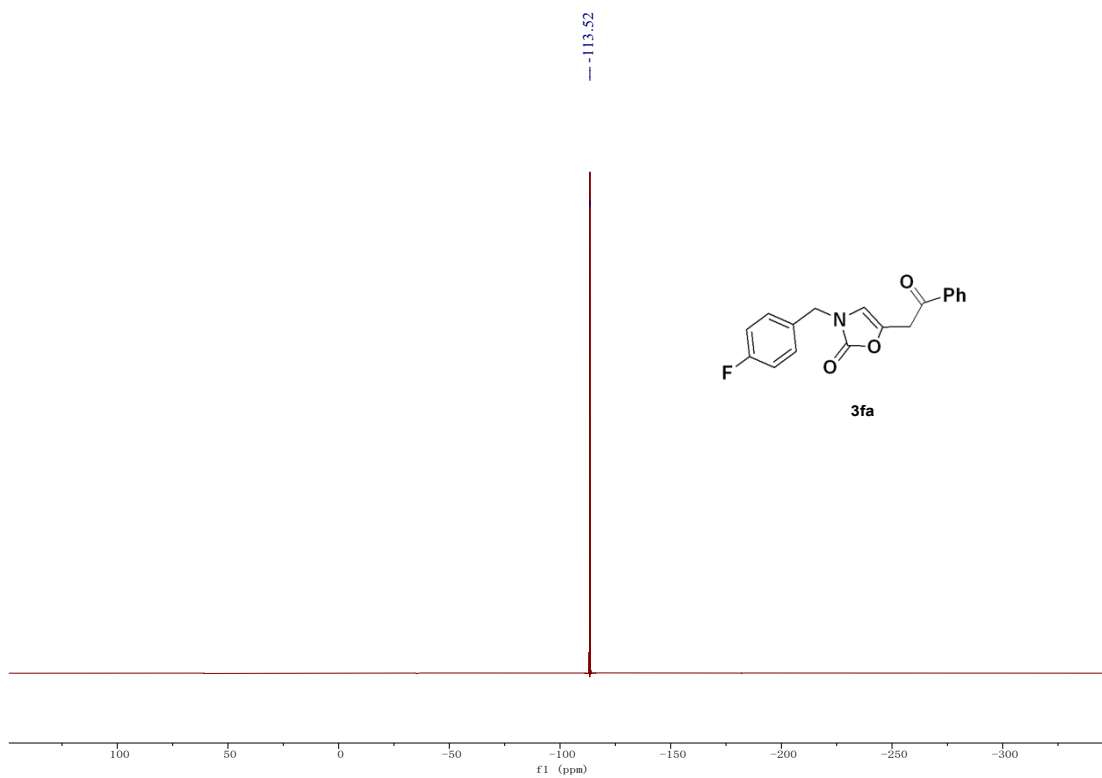

$^{18}\text{F}$  NMR (162 MHz,  $\text{CDCl}_3$ )

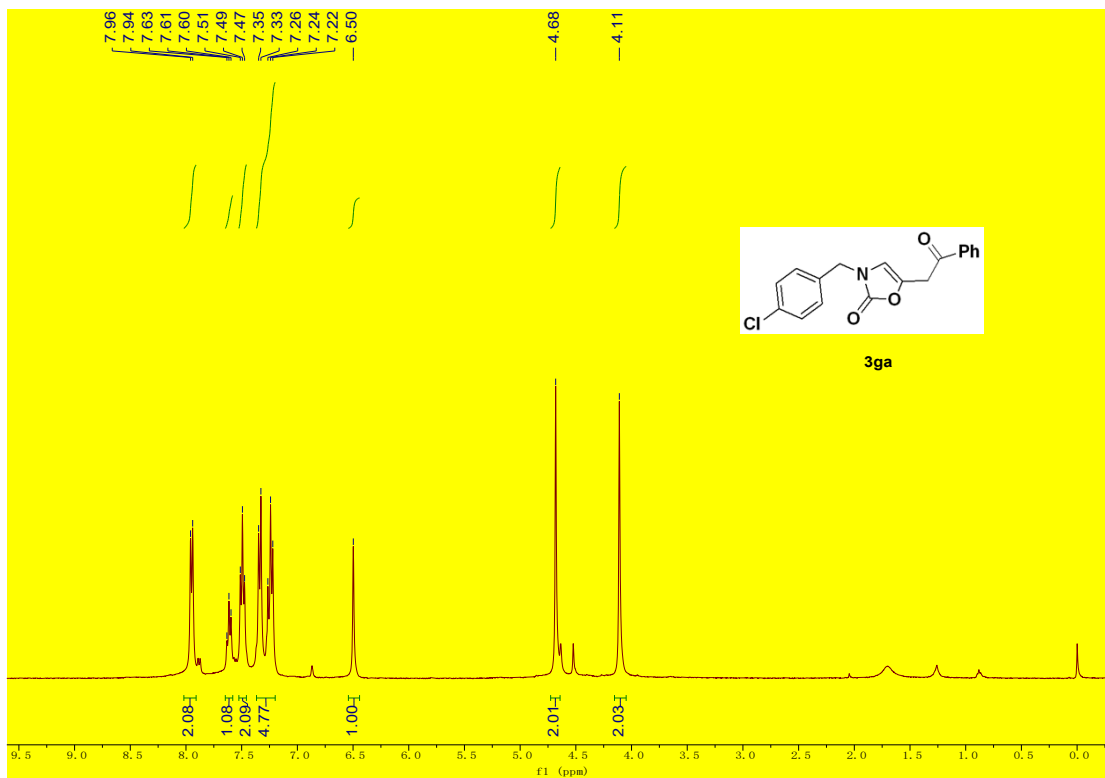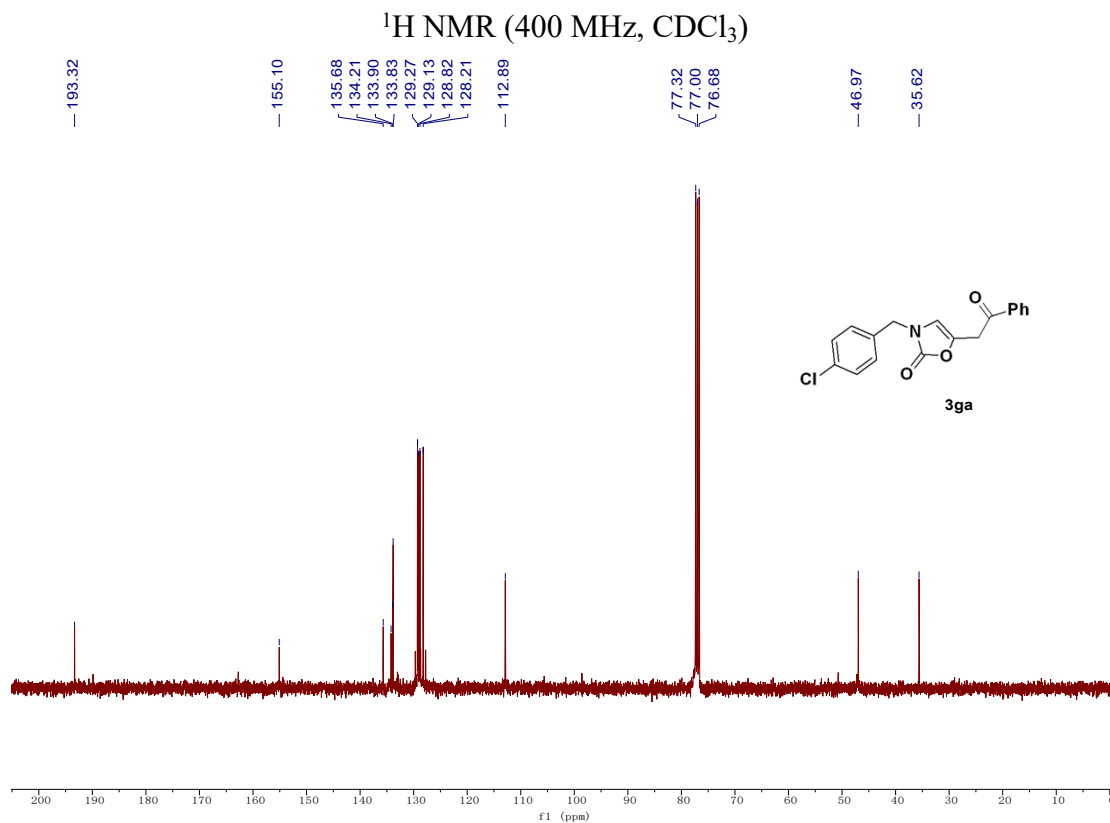

<sup>13</sup>C NMR (101 MHz, CDCl<sub>3</sub>)

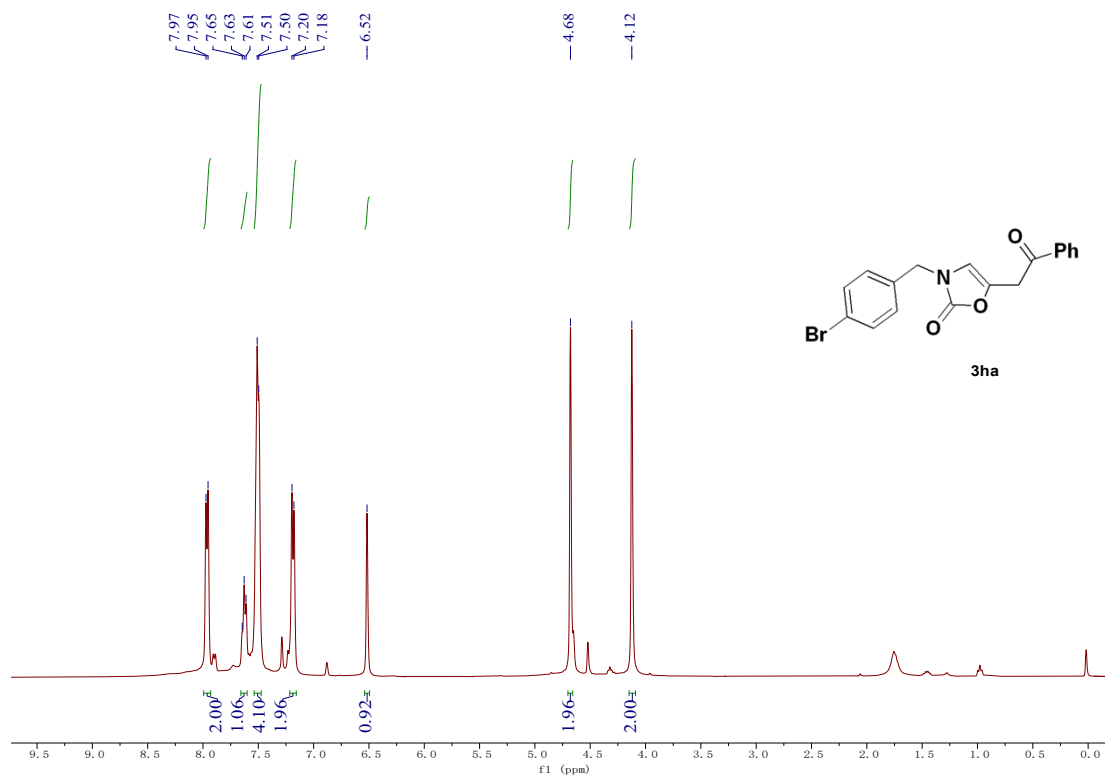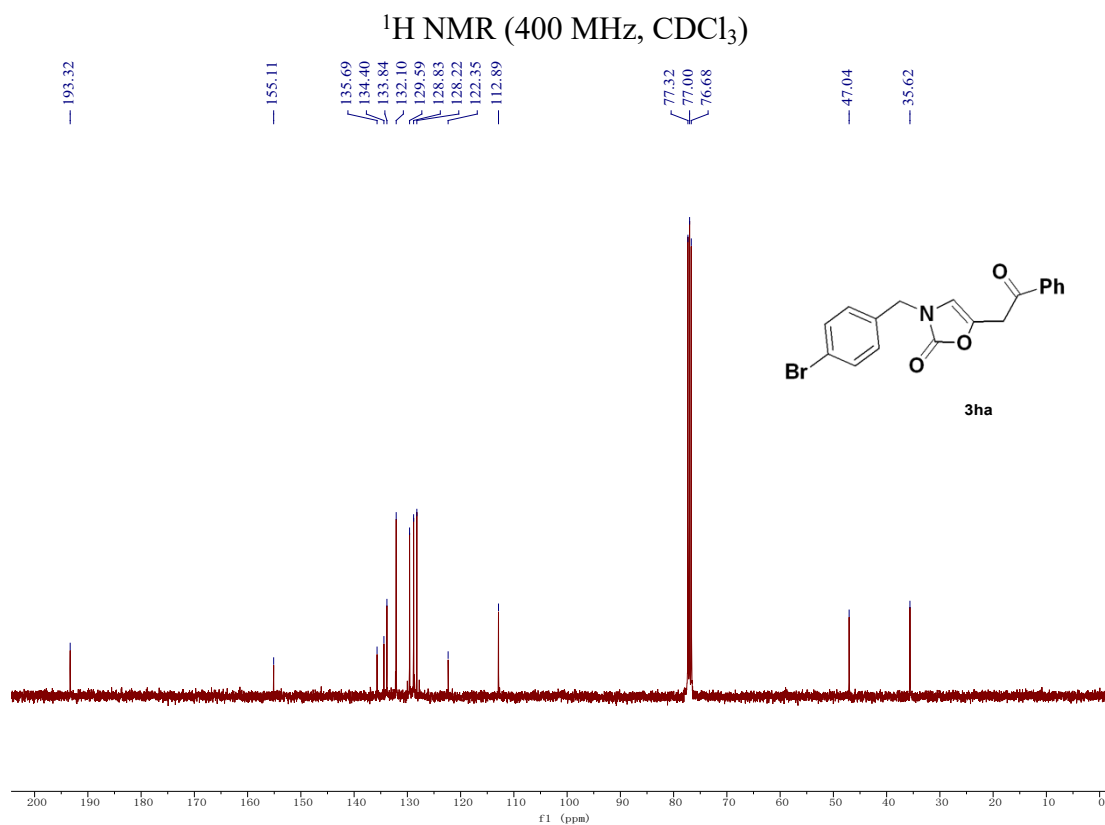



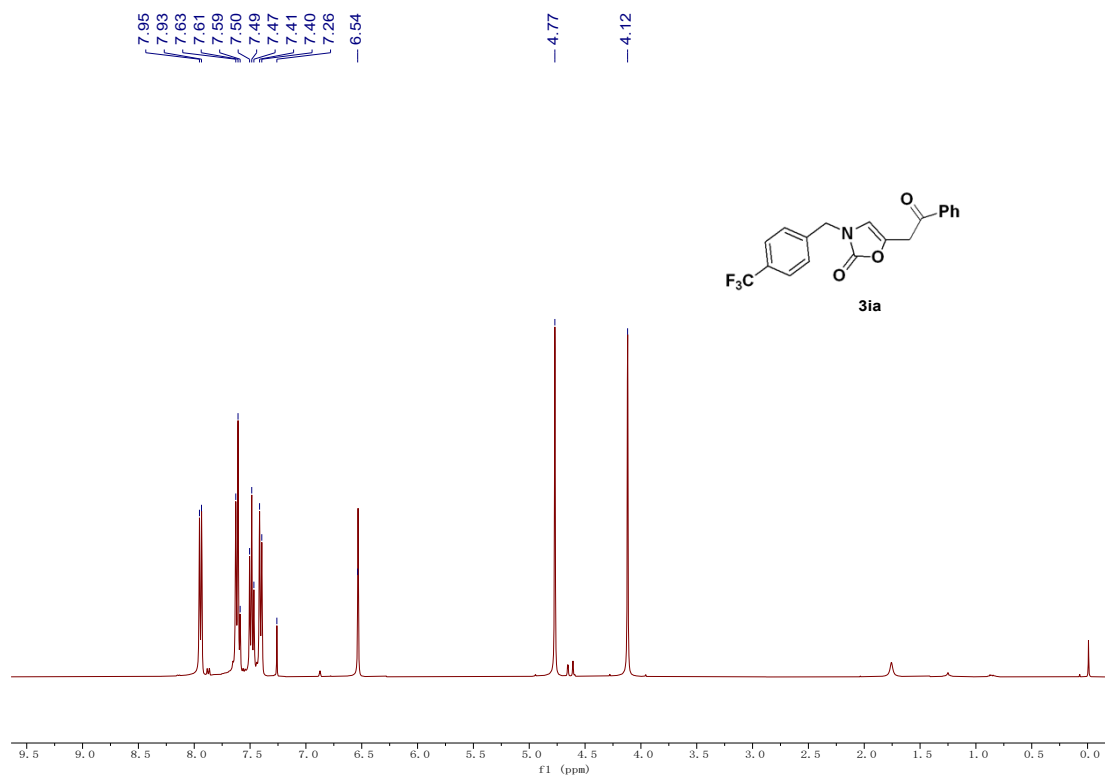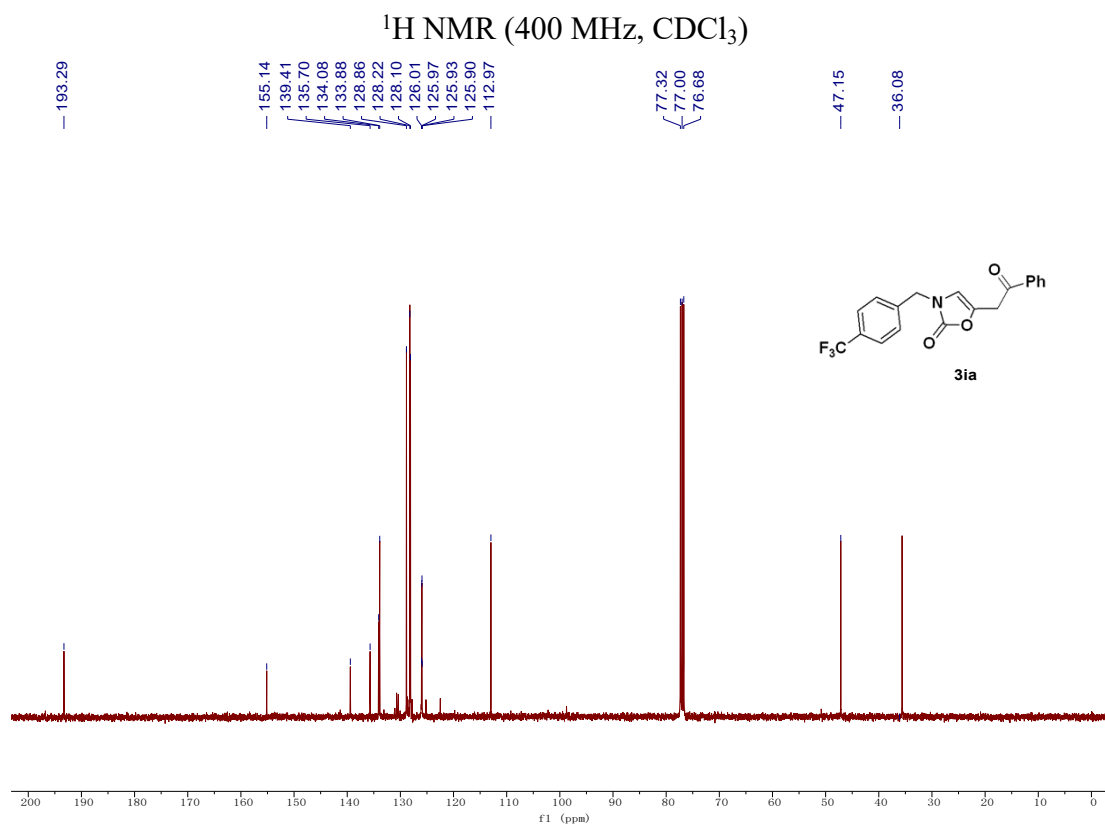

<sup>13</sup>C NMR (101 MHz, CDCl<sub>3</sub>)

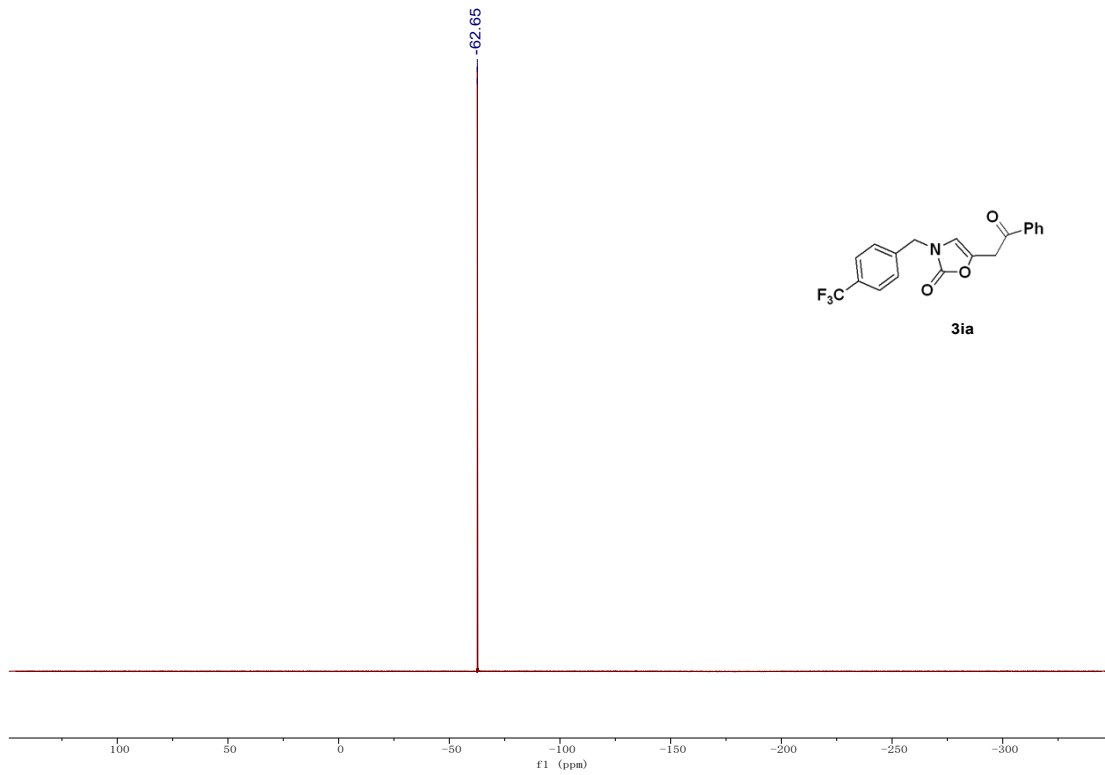

$^{18}\text{F}$  NMR (162 MHz,  $\text{CDCl}_3$ )

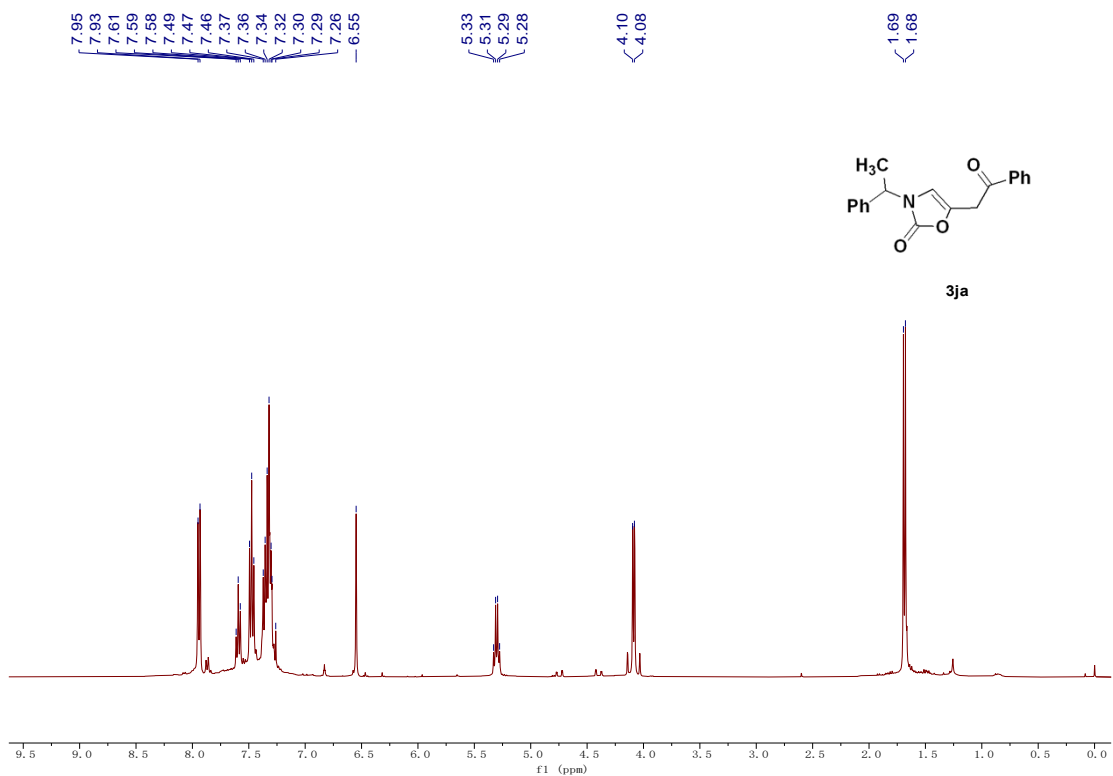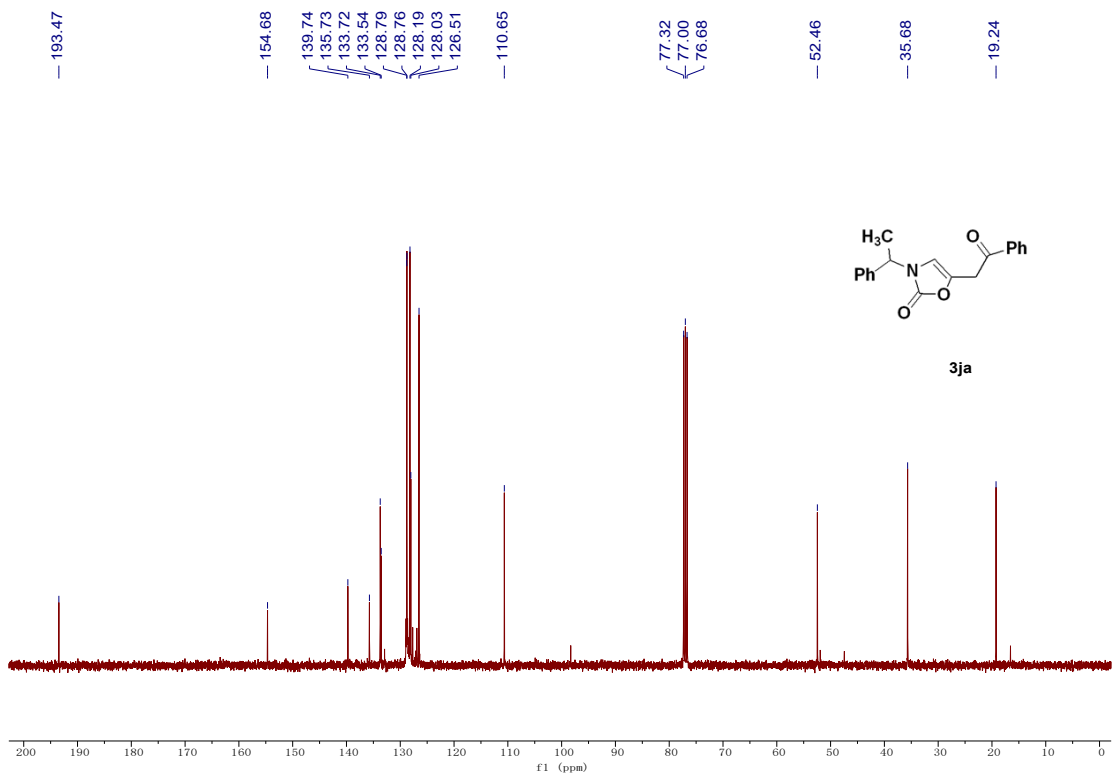

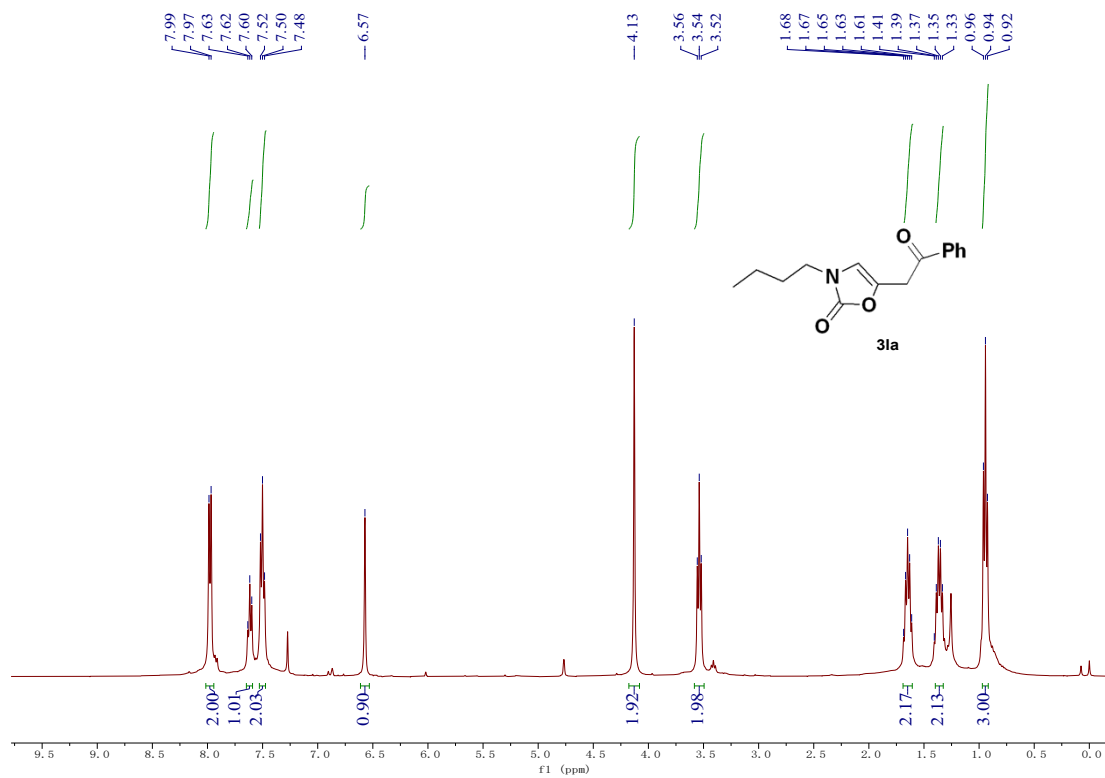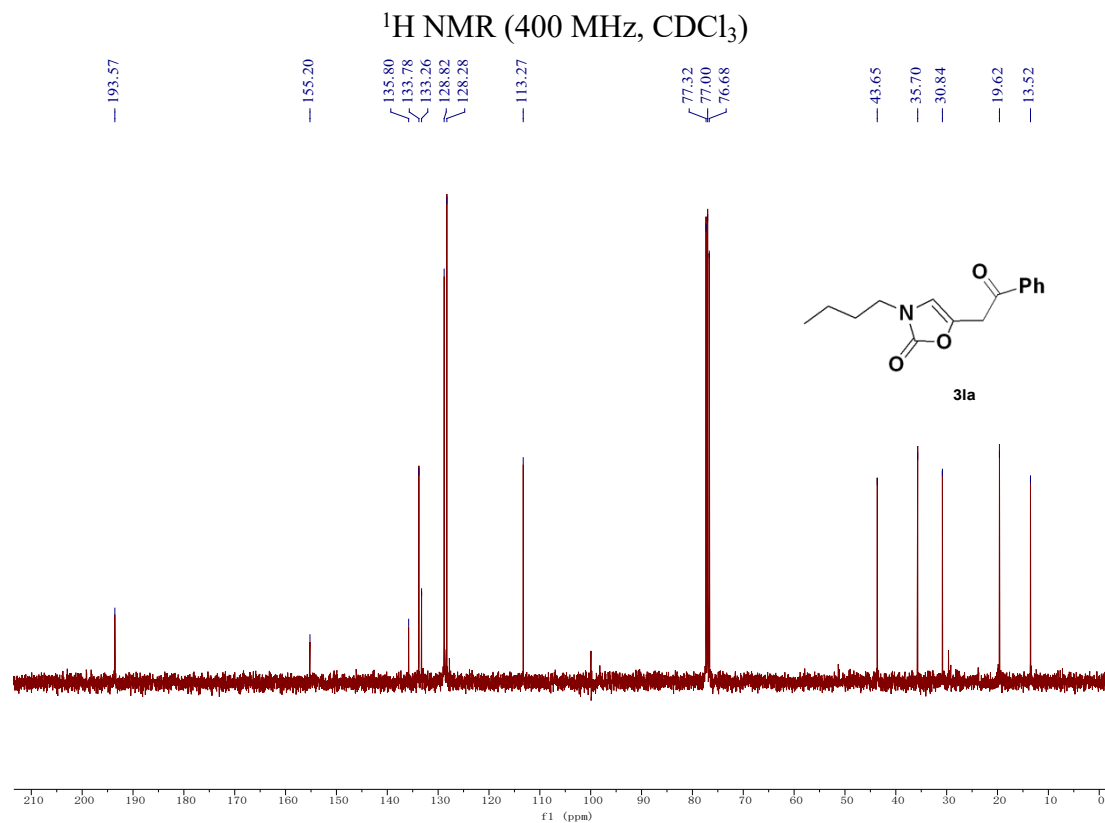

<sup>13</sup>C NMR (101 MHz, CDCl<sub>3</sub>)

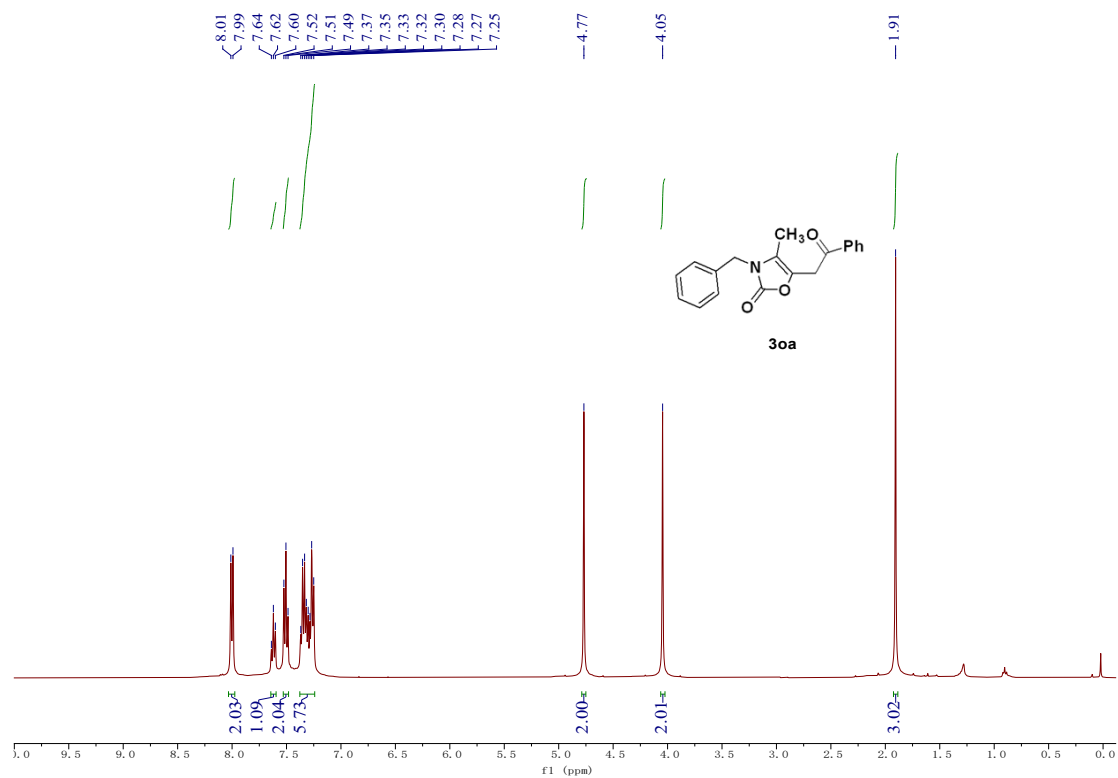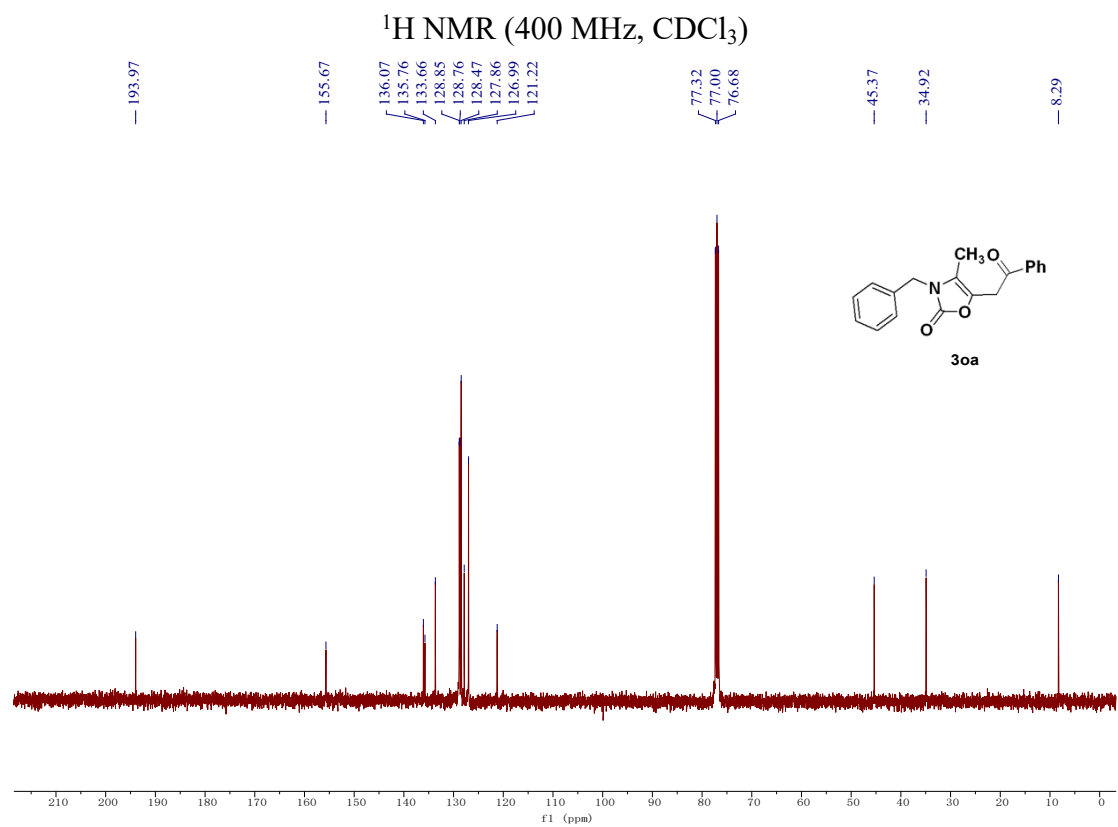

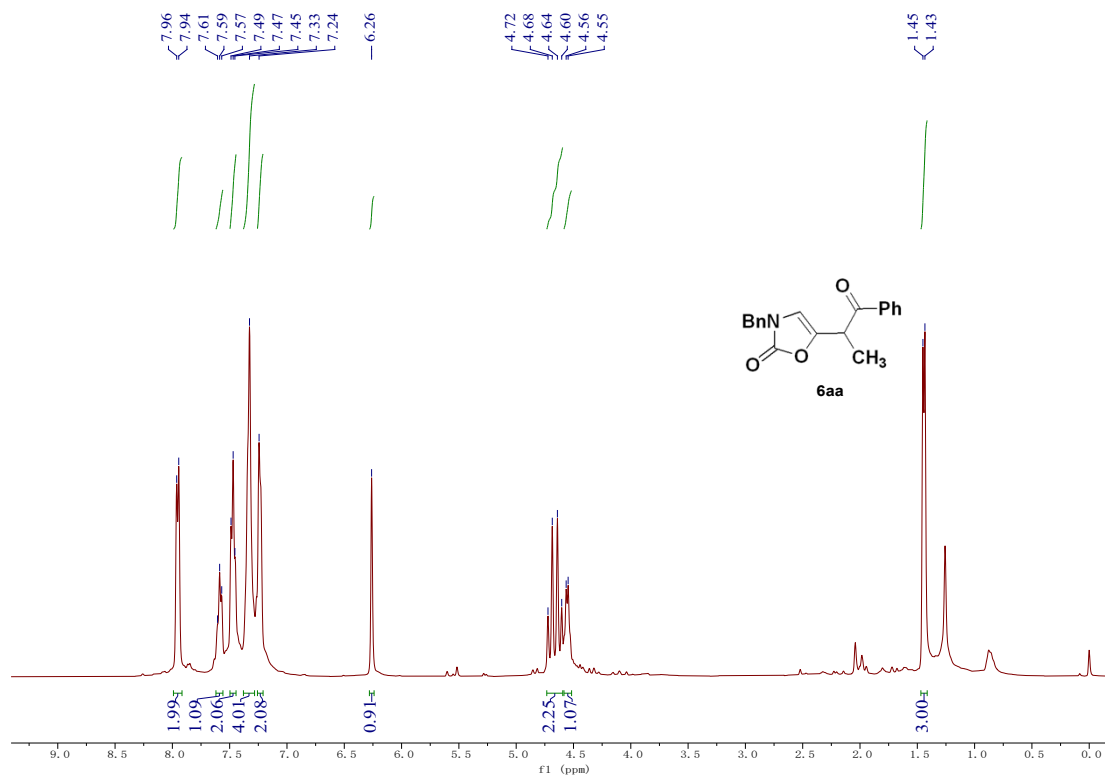

<sup>1</sup>H NMR (400 MHz, CDCl<sub>3</sub>)

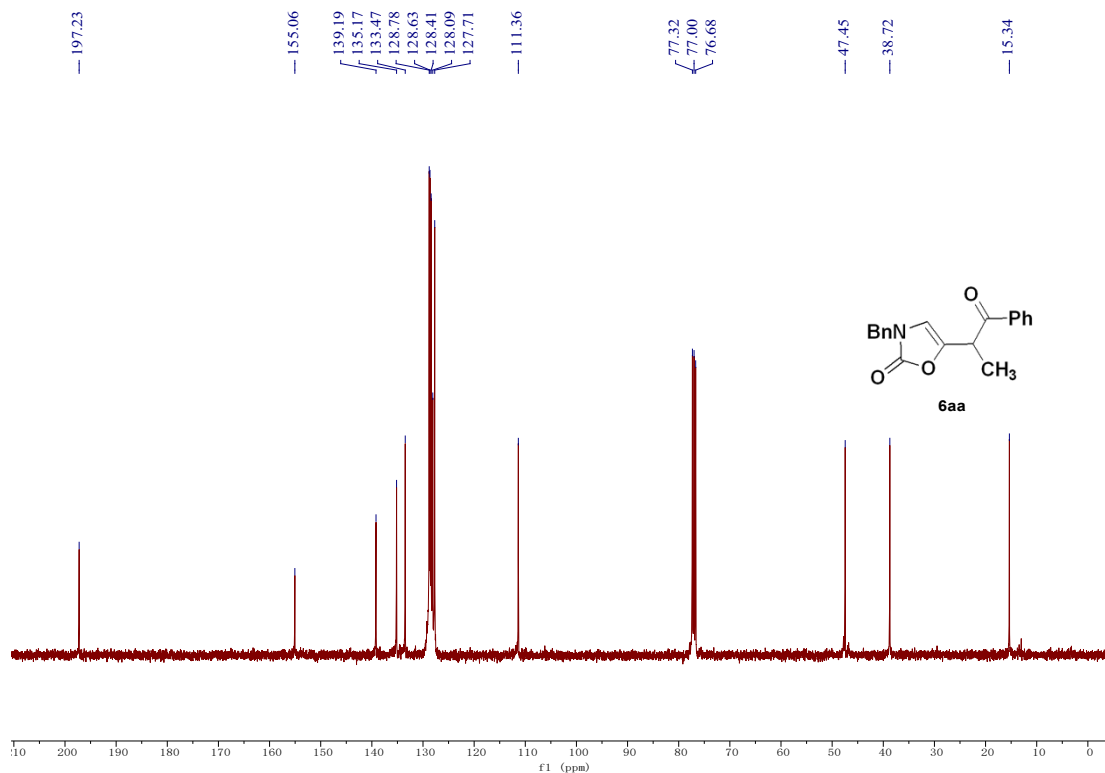

<sup>13</sup>C NMR (101 MHz, CDCl<sub>3</sub>)

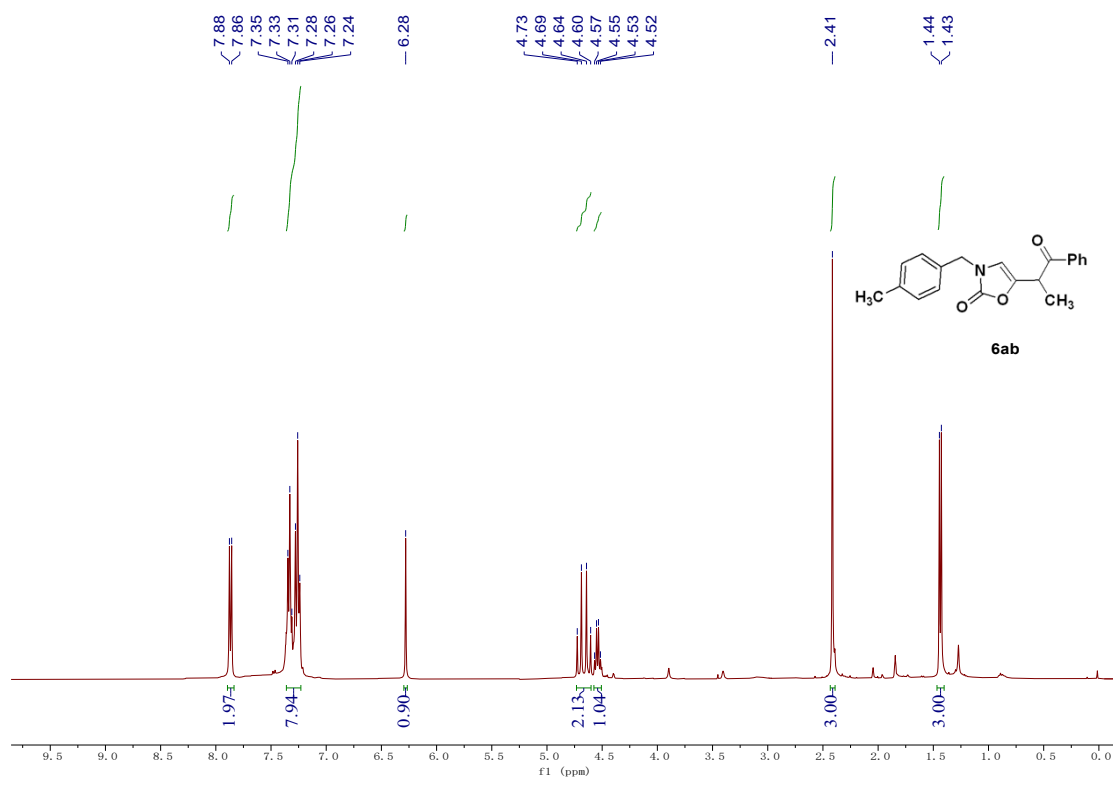

<sup>1</sup>H NMR (400 MHz, CDCl<sub>3</sub>)

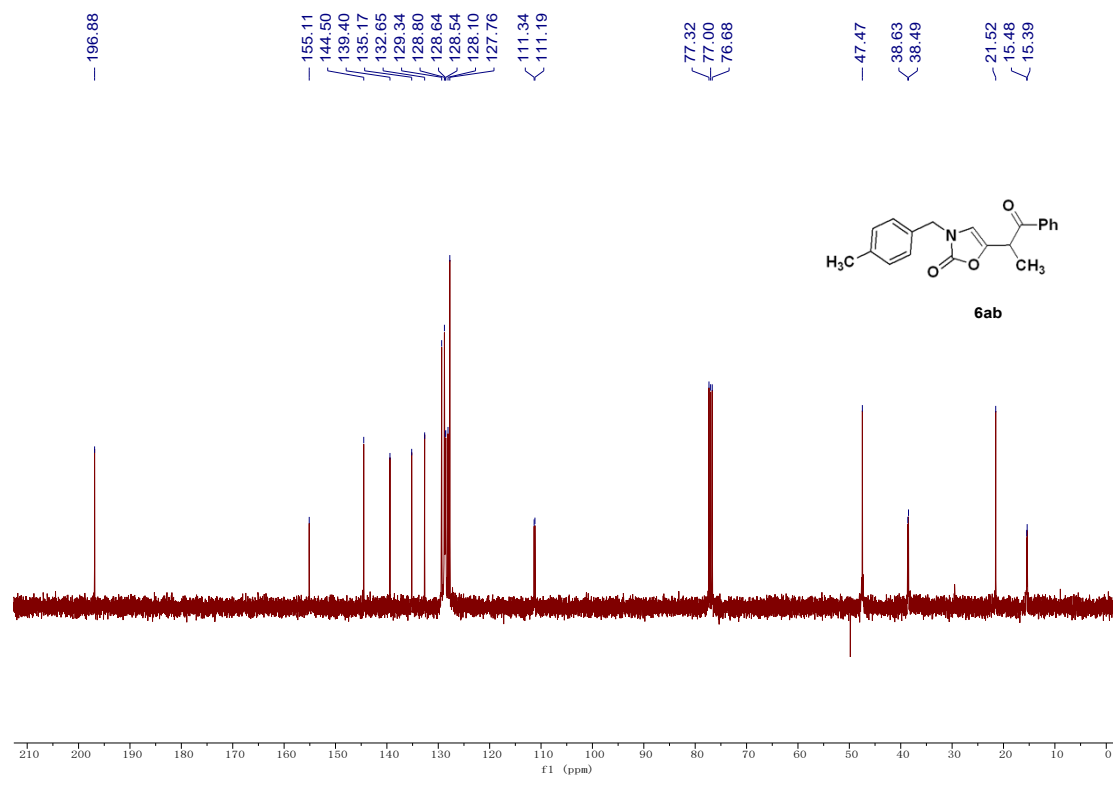

<sup>13</sup>C NMR (101 MHz, CDCl<sub>3</sub>)

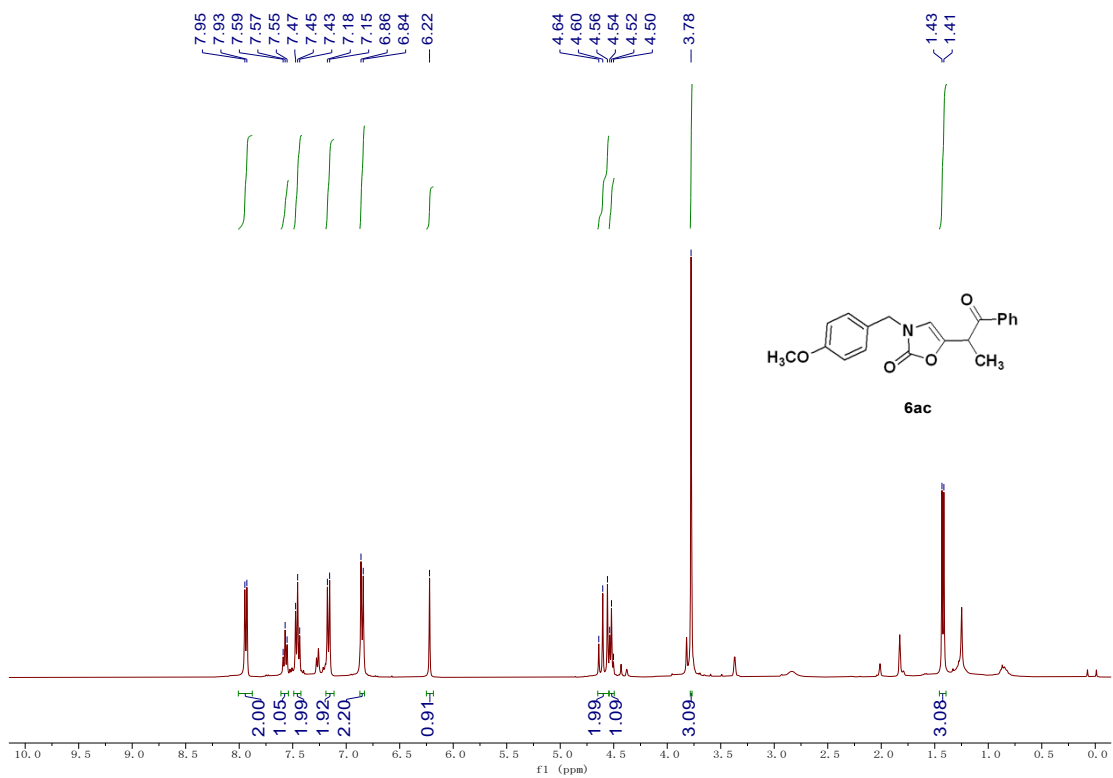

<sup>1</sup>H NMR (400 MHz, CDCl<sub>3</sub>)

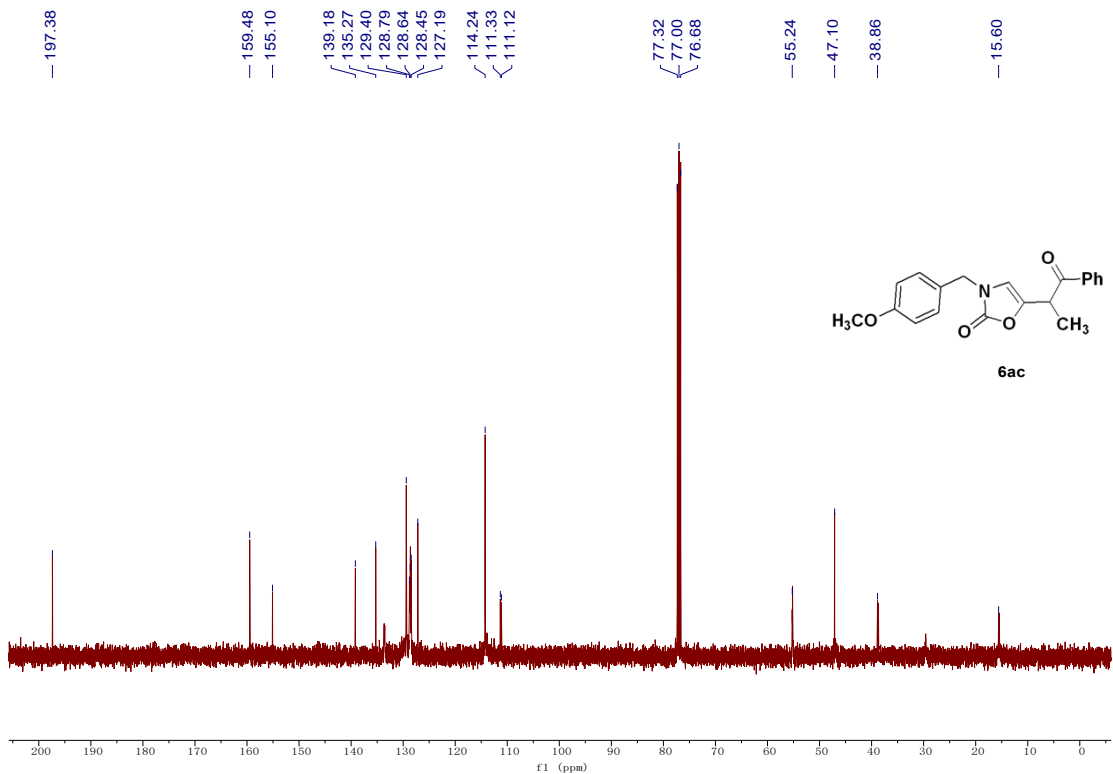

<sup>13</sup>C NMR (101 MHz, CDCl<sub>3</sub>)



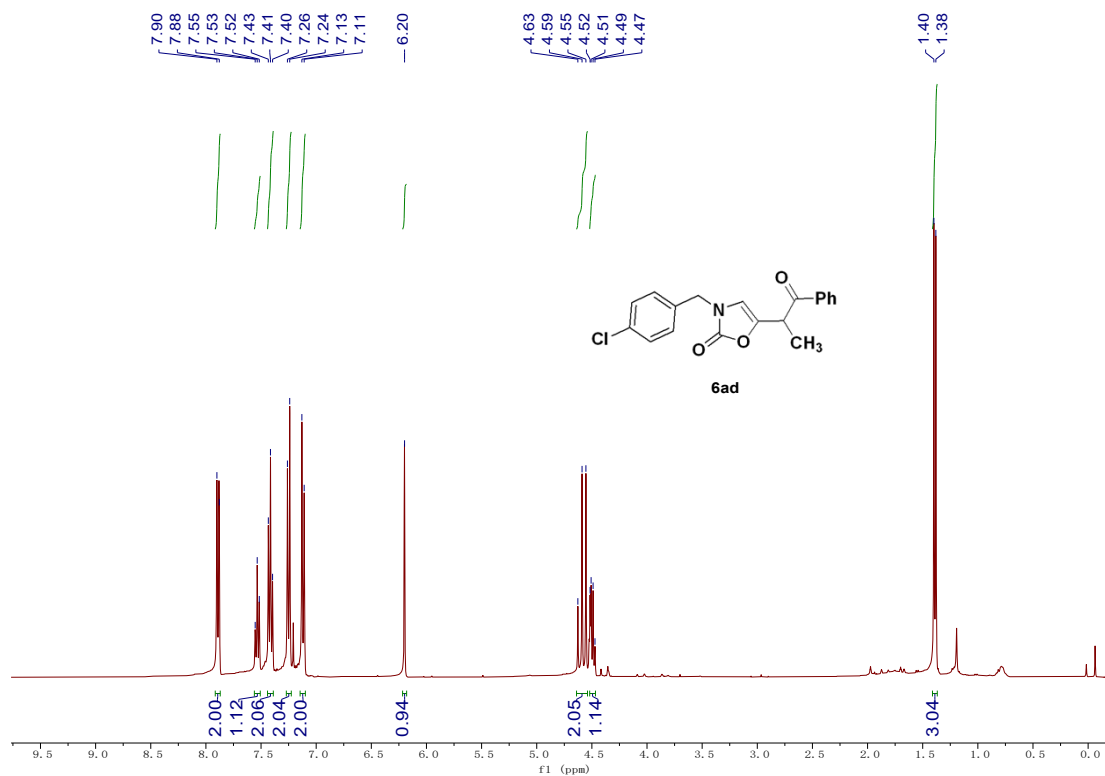

$^1\text{H}$  NMR (400 MHz,  $\text{CDCl}_3$ )

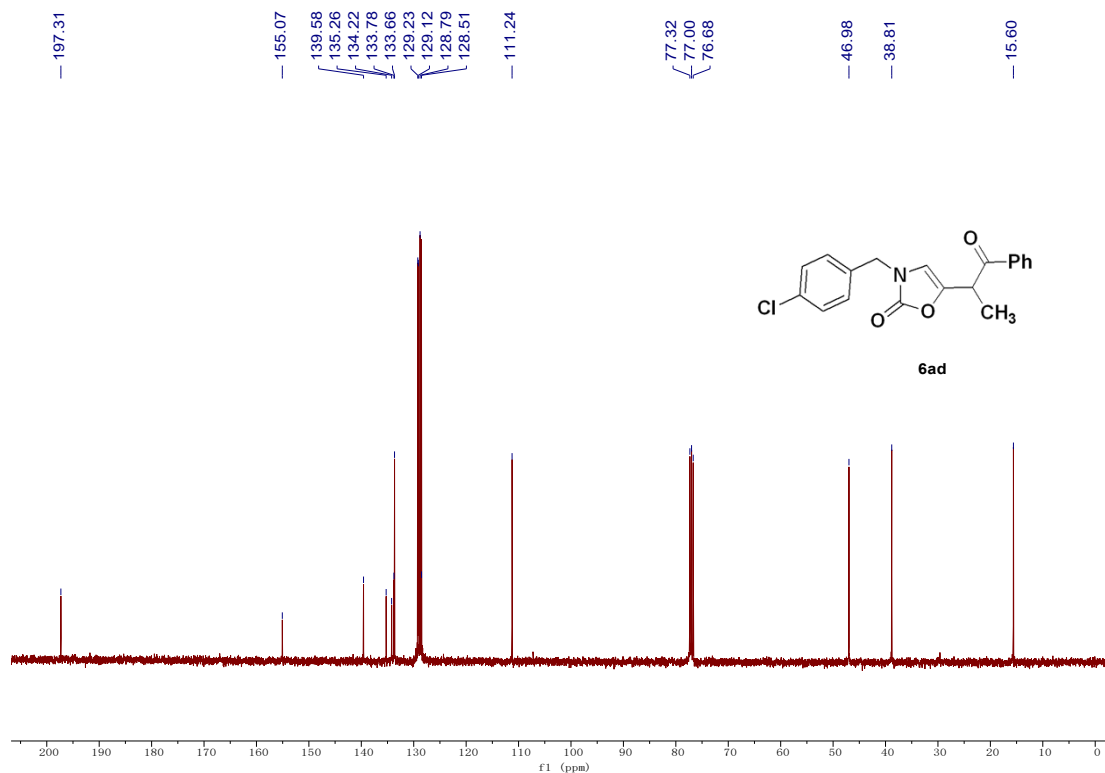

$^{13}\text{C}$  NMR (101 MHz,  $\text{CDCl}_3$ )

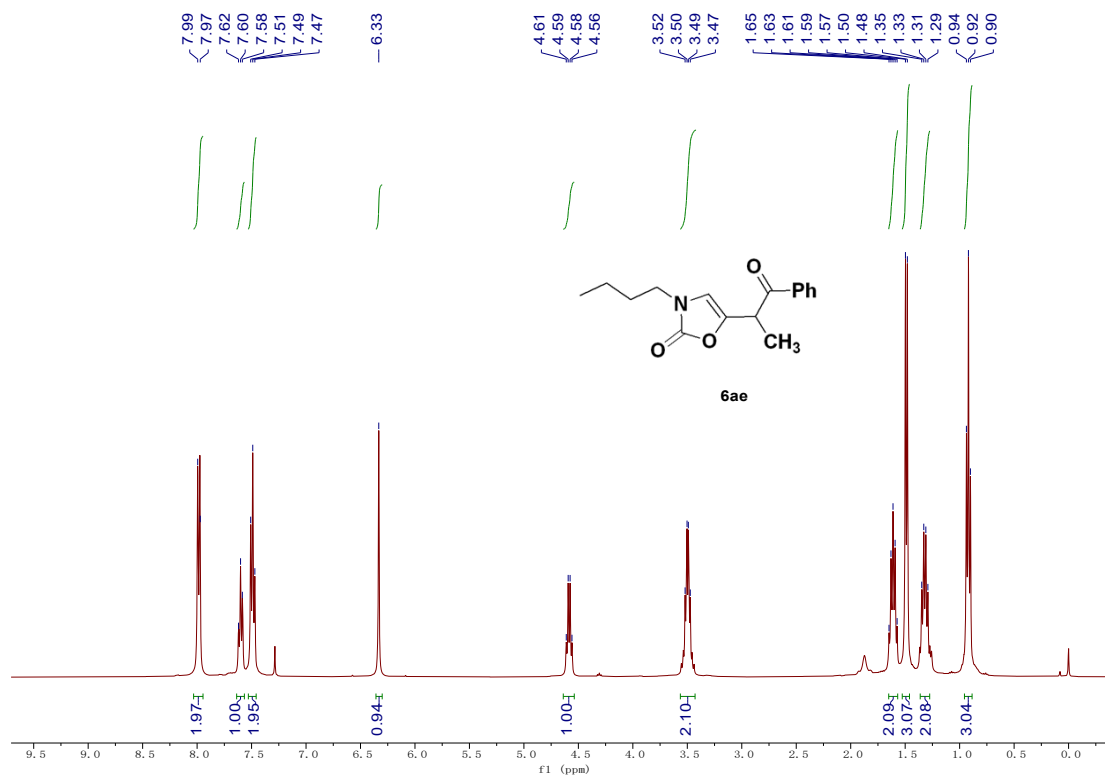

<sup>1</sup>H NMR (400 MHz, CDCl<sub>3</sub>)

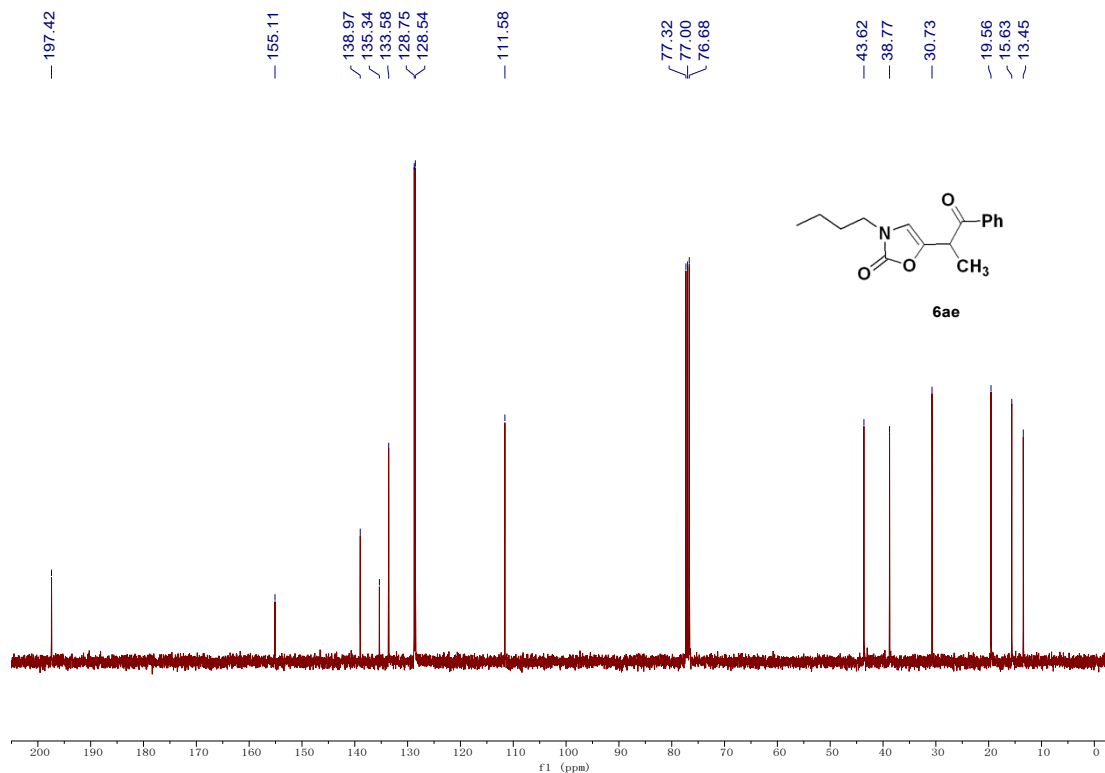

<sup>13</sup>C NMR (101 MHz, CDCl<sub>3</sub>)

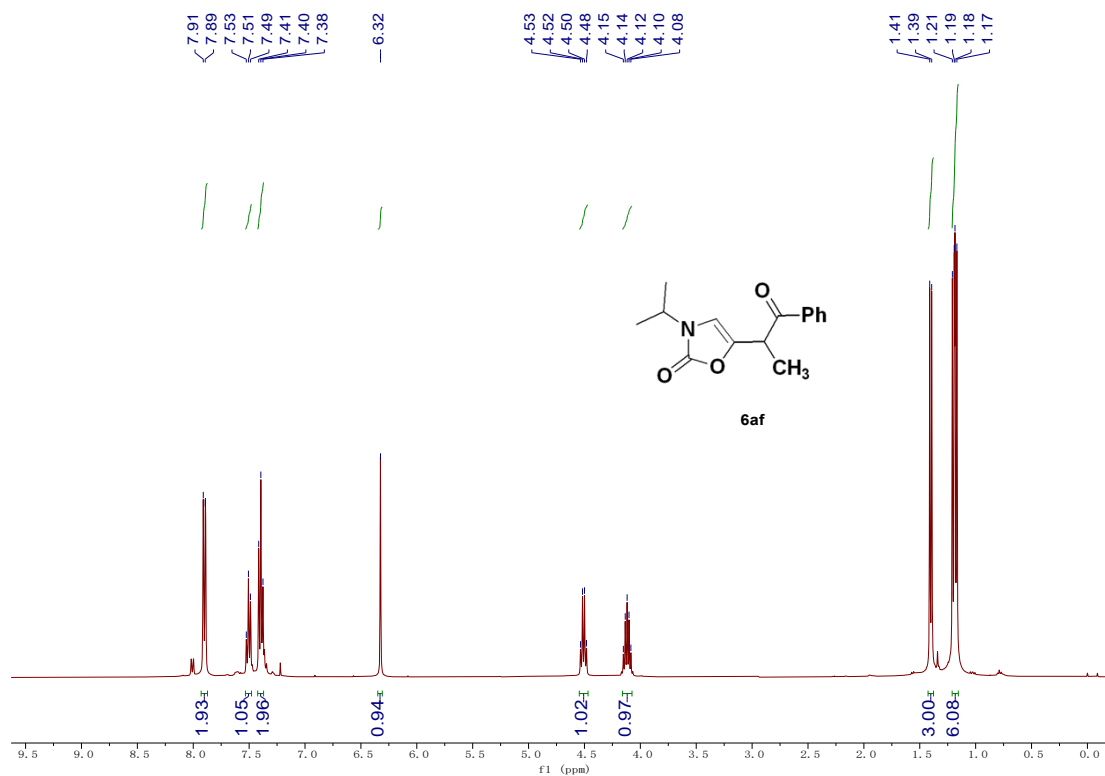

<sup>1</sup>H NMR (400 MHz, CDCl<sub>3</sub>)

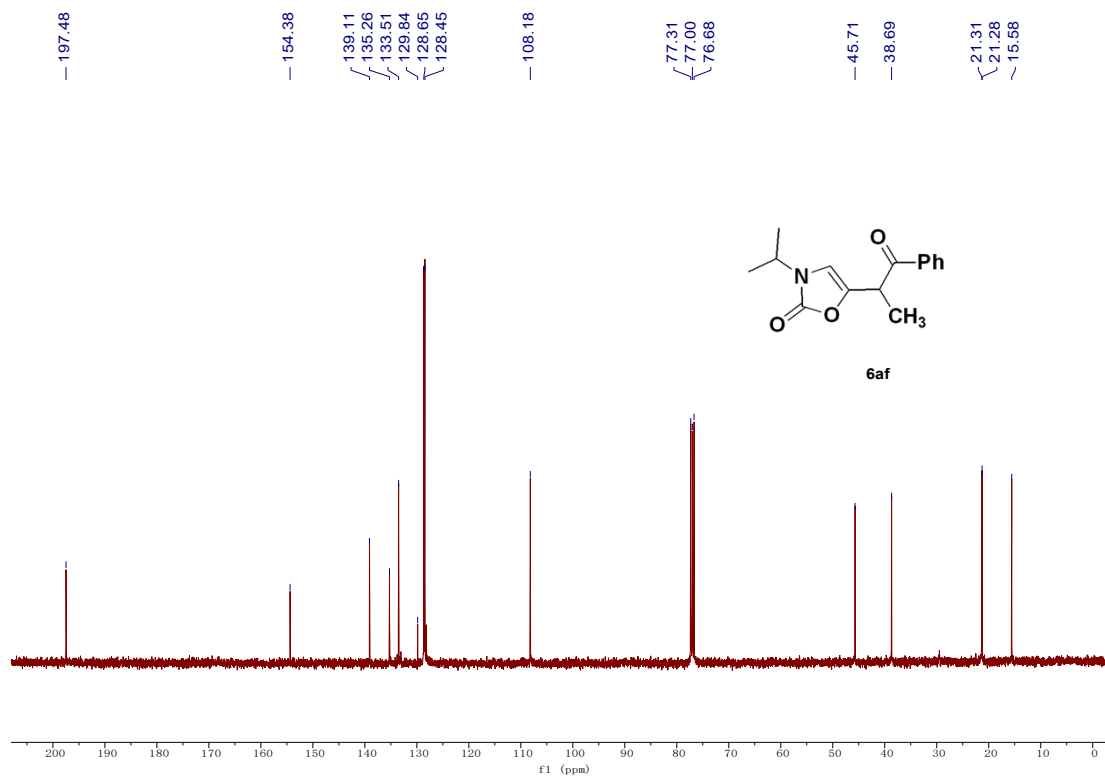

<sup>13</sup>C NMR (101 MHz, CDCl<sub>3</sub>)

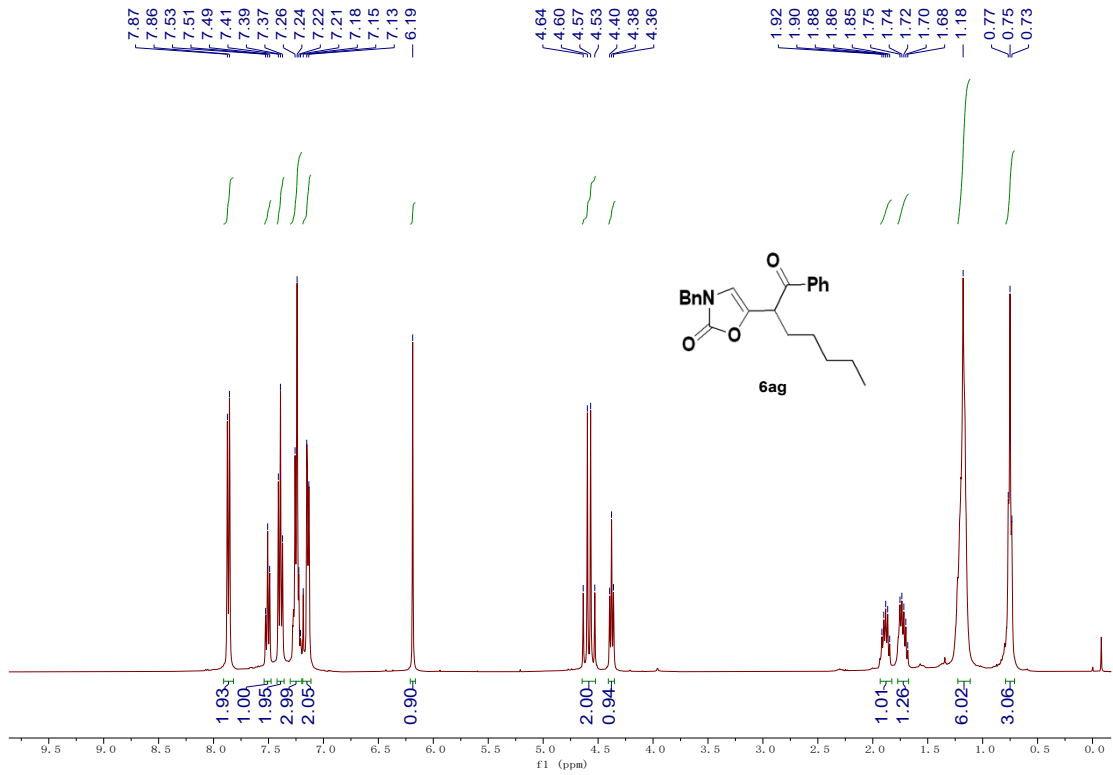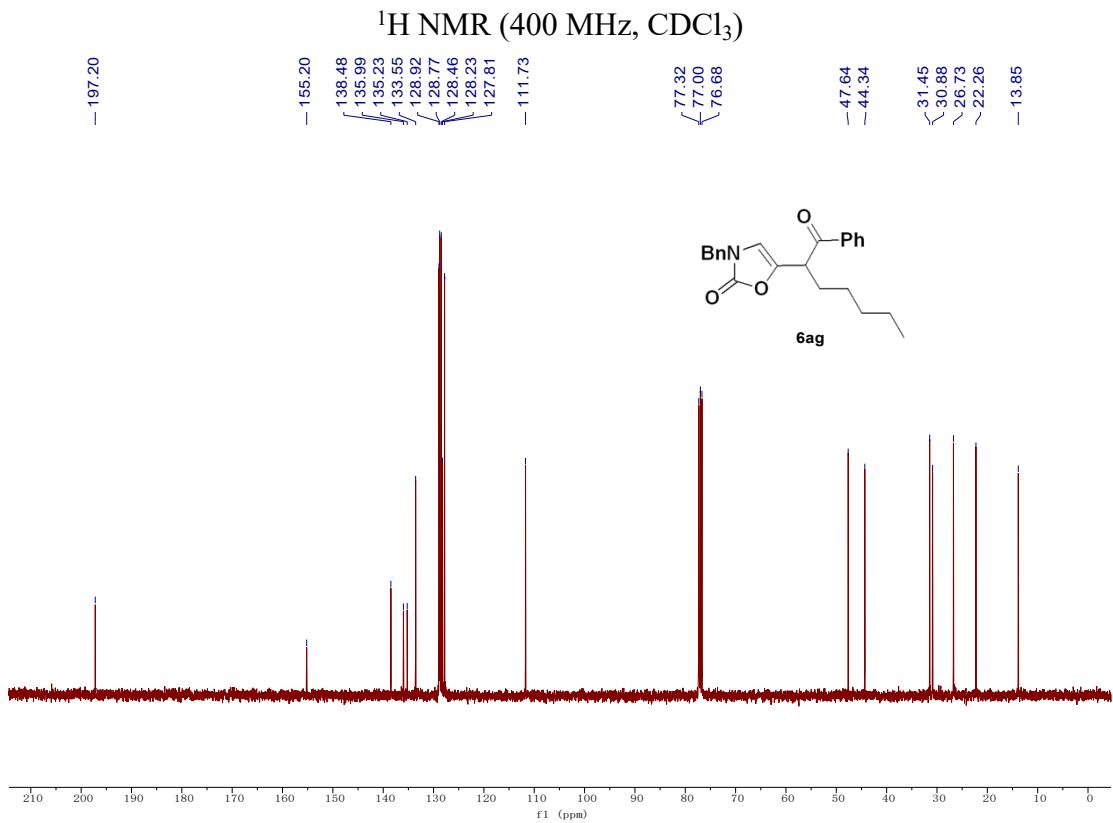

**<sup>13</sup>C NMR (101 MHz, CDCl<sub>3</sub>)**

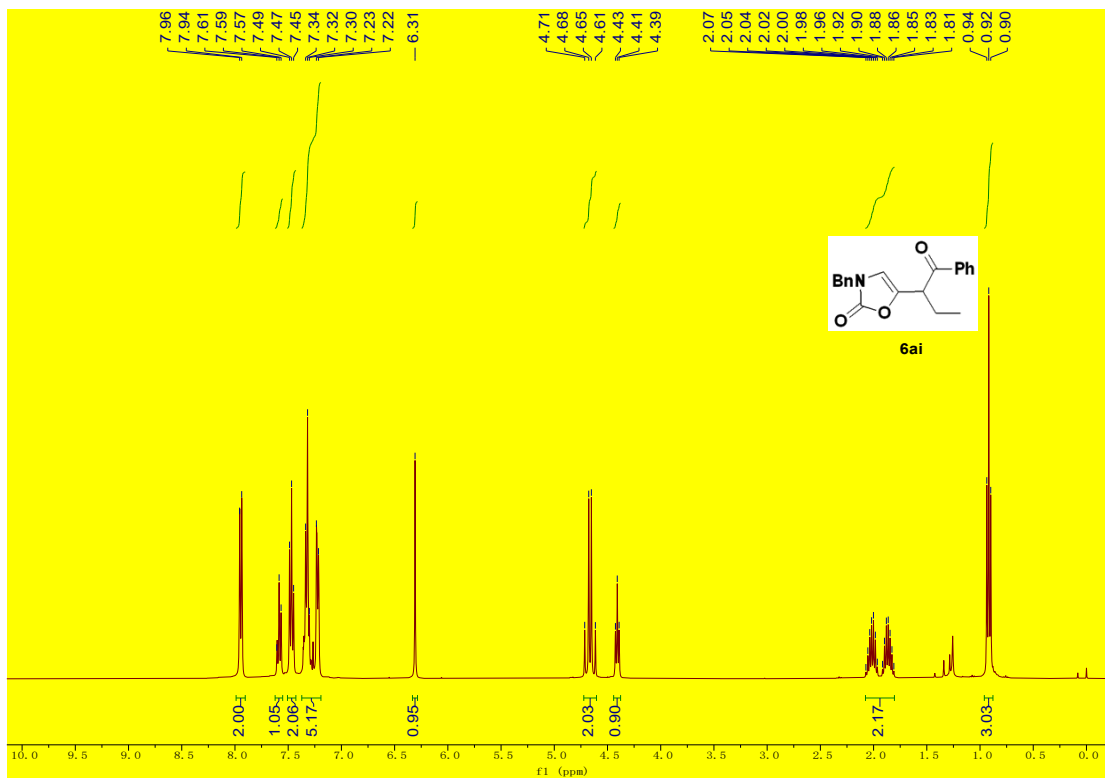

<sup>1</sup>H NMR (400 MHz, CDCl<sub>3</sub>)

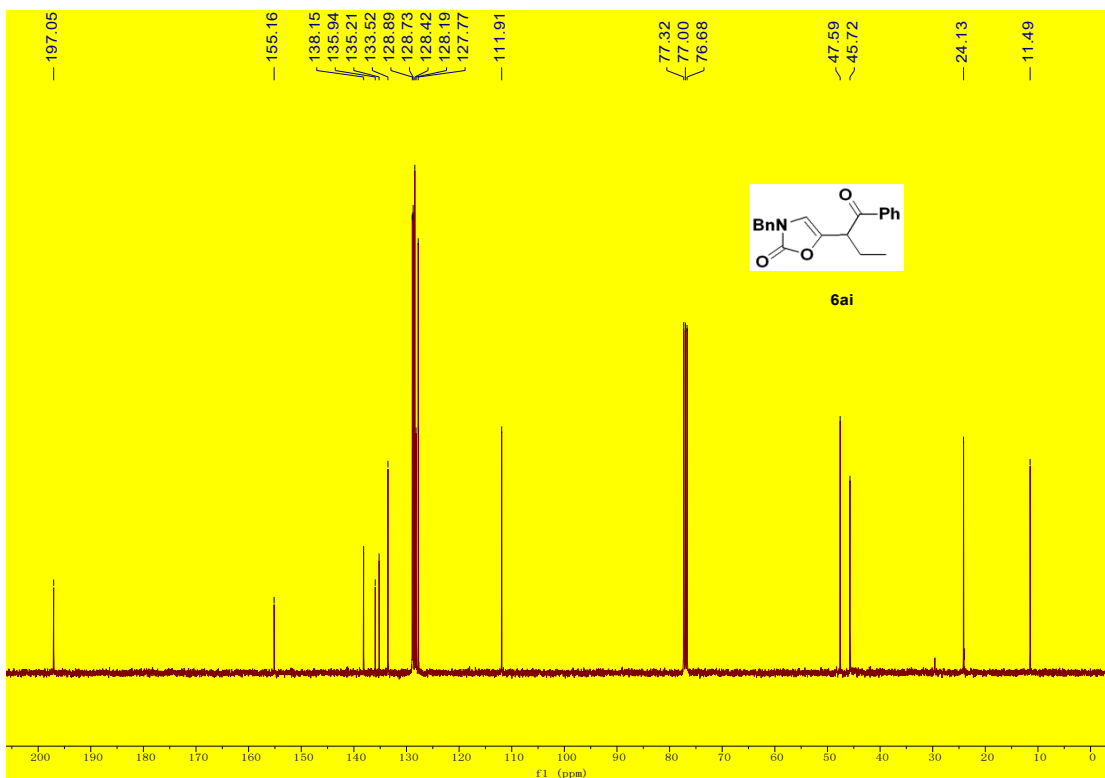

<sup>13</sup>C NMR (101 MHz, CDCl<sub>3</sub>)

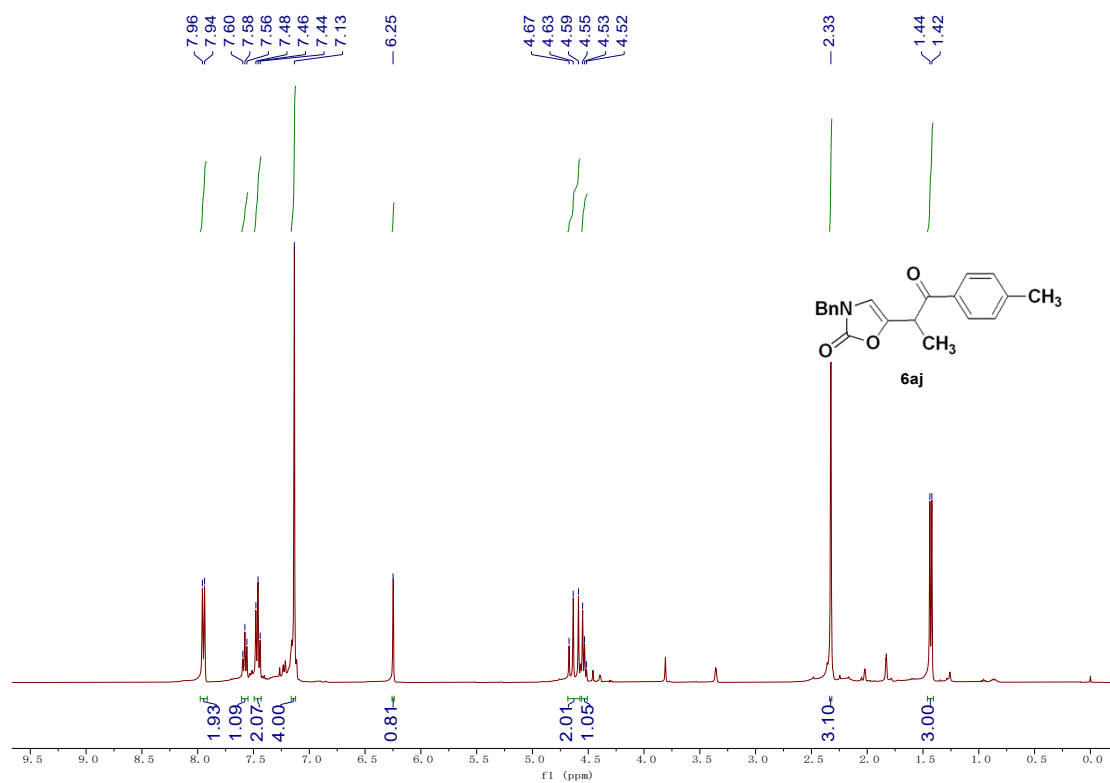

$^1\text{H NMR}$  (400 MHz,  $\text{CDCl}_3$ )

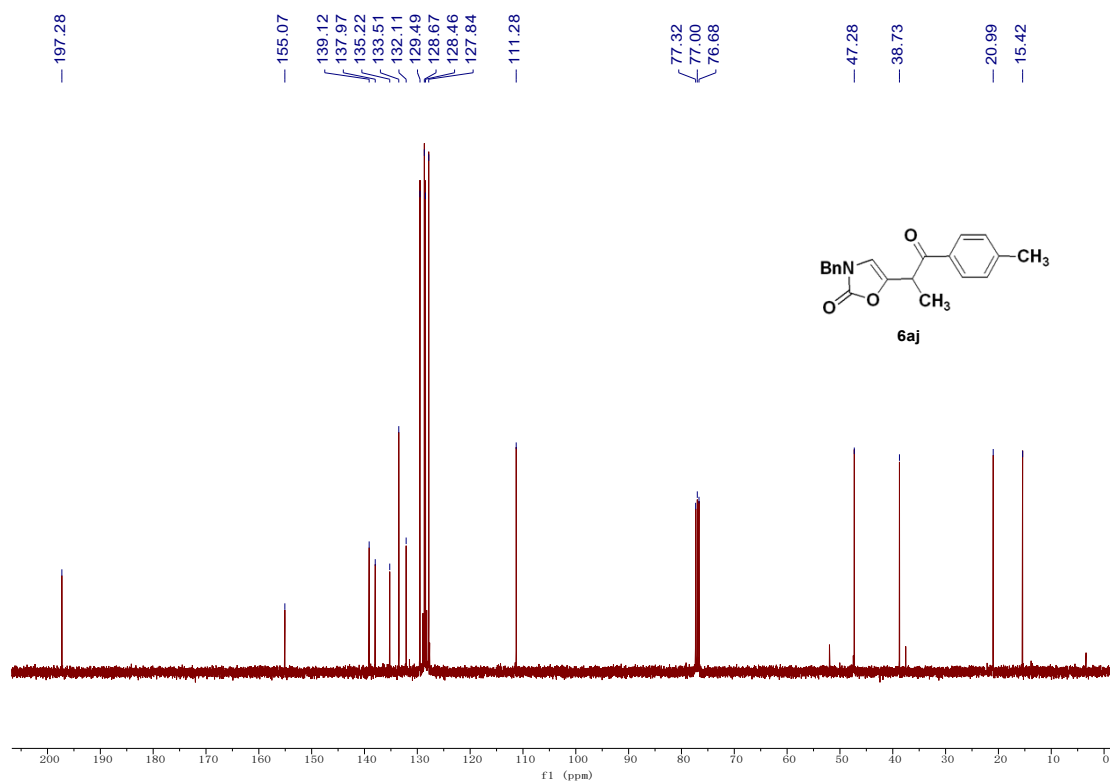

$^{13}\text{C NMR}$  (101 MHz,  $\text{CDCl}_3$ )

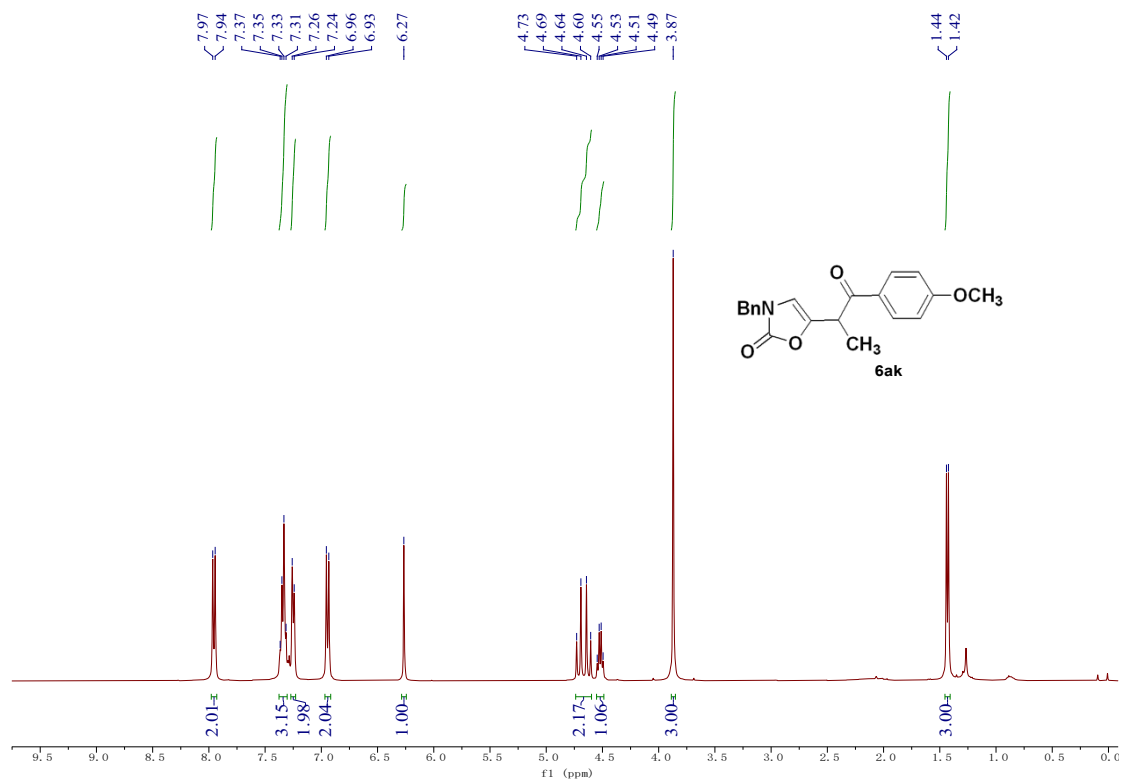

<sup>1</sup>H NMR (400 MHz, CDCl<sub>3</sub>)

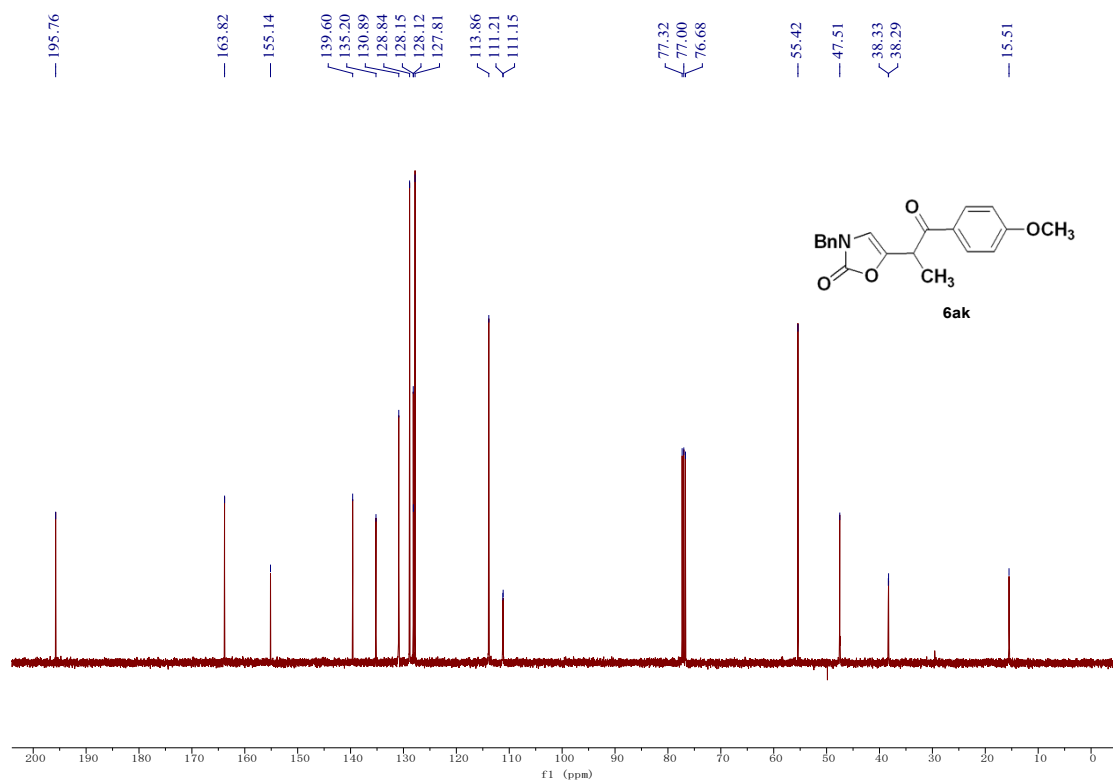

<sup>13</sup>C NMR (101 MHz, CDCl<sub>3</sub>)

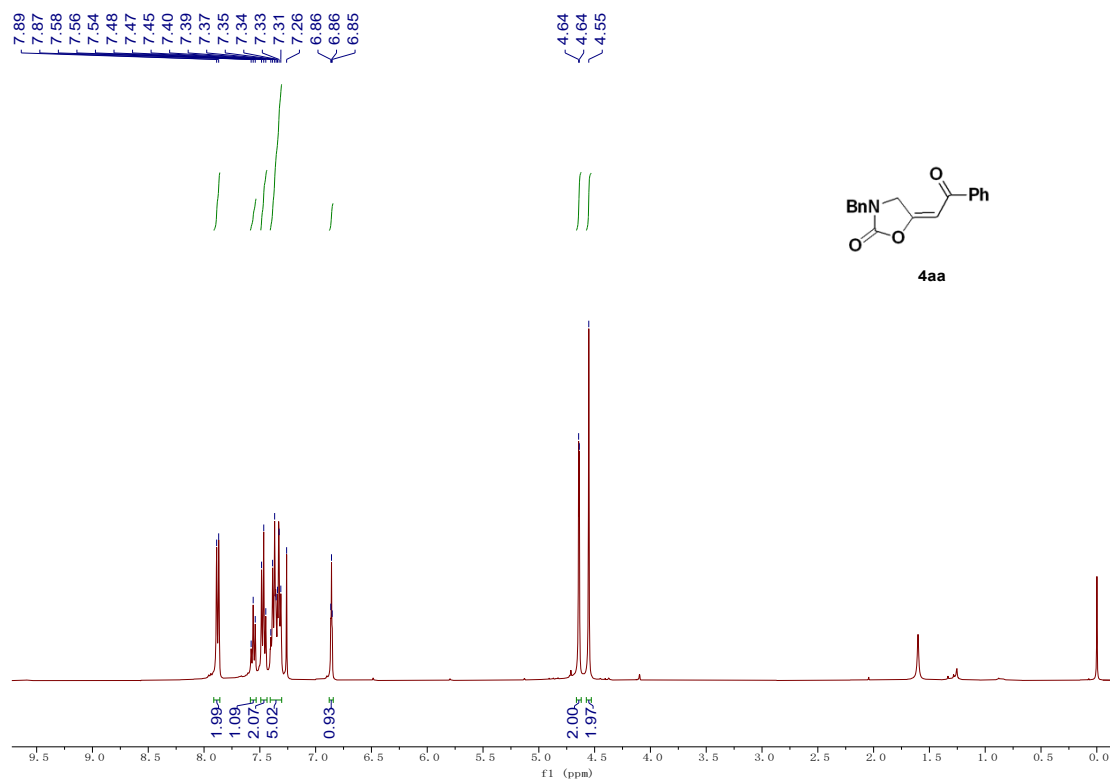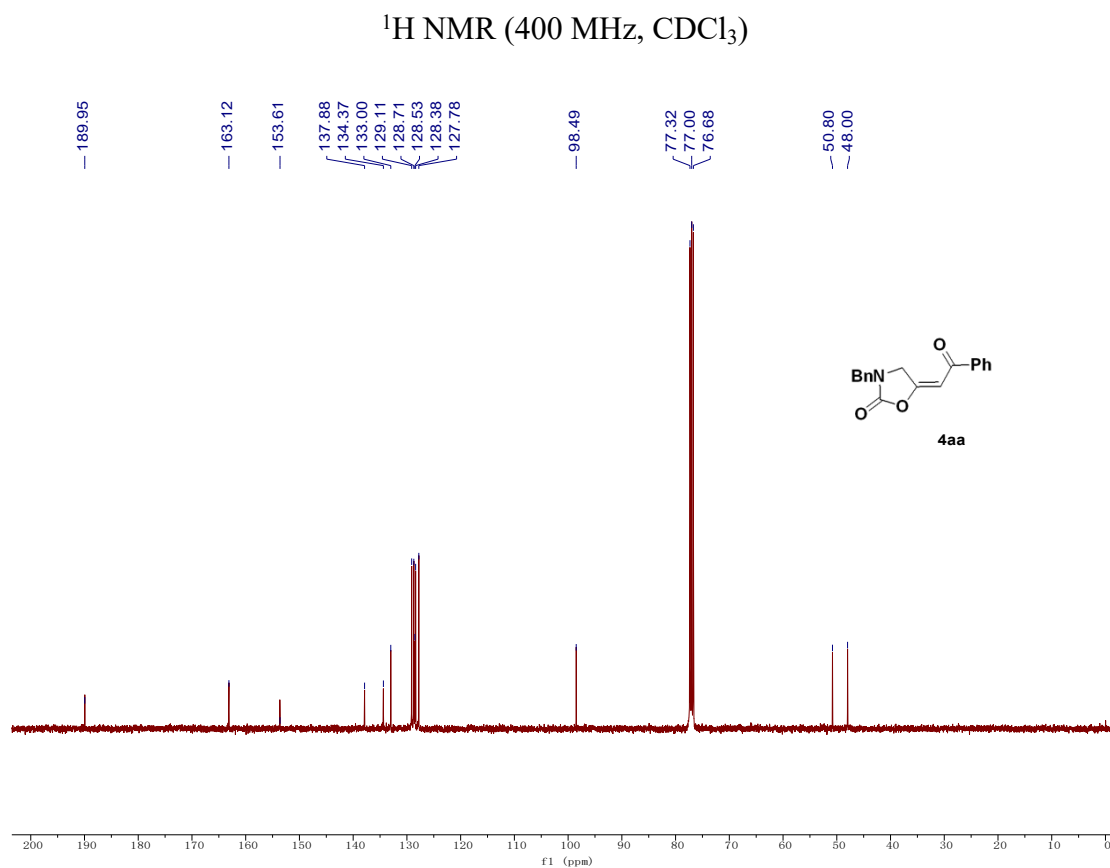

<sup>13</sup>C NMR (101 MHz, CDCl<sub>3</sub>)



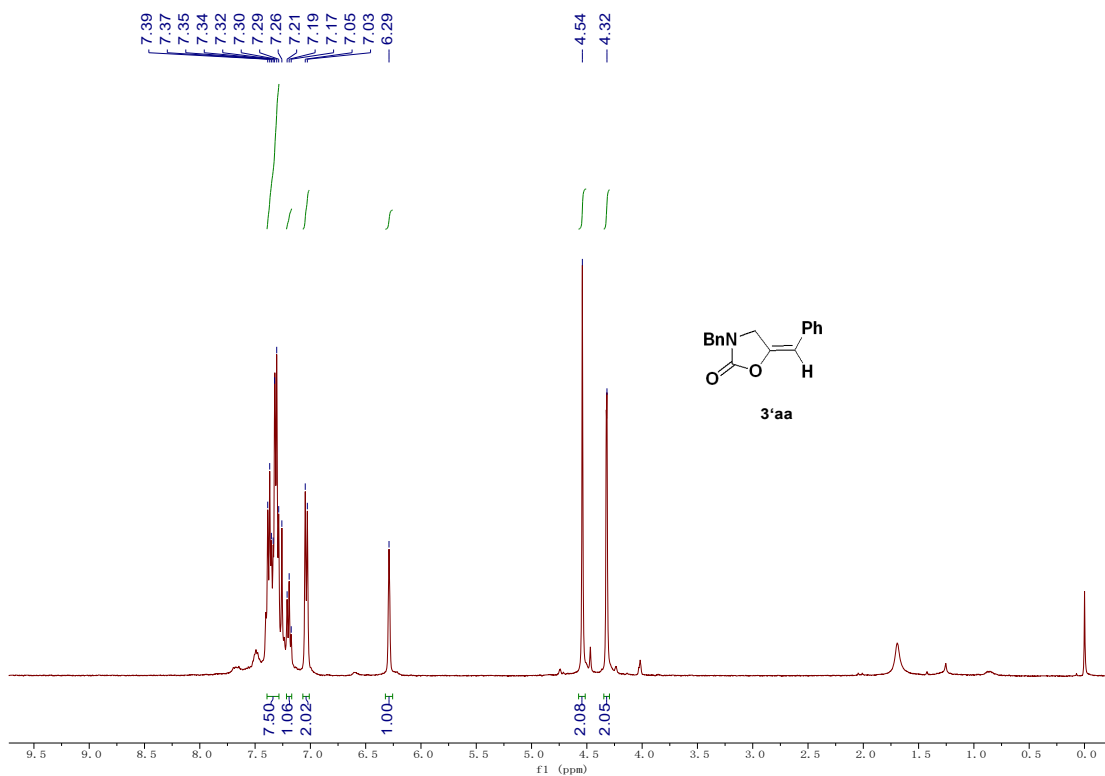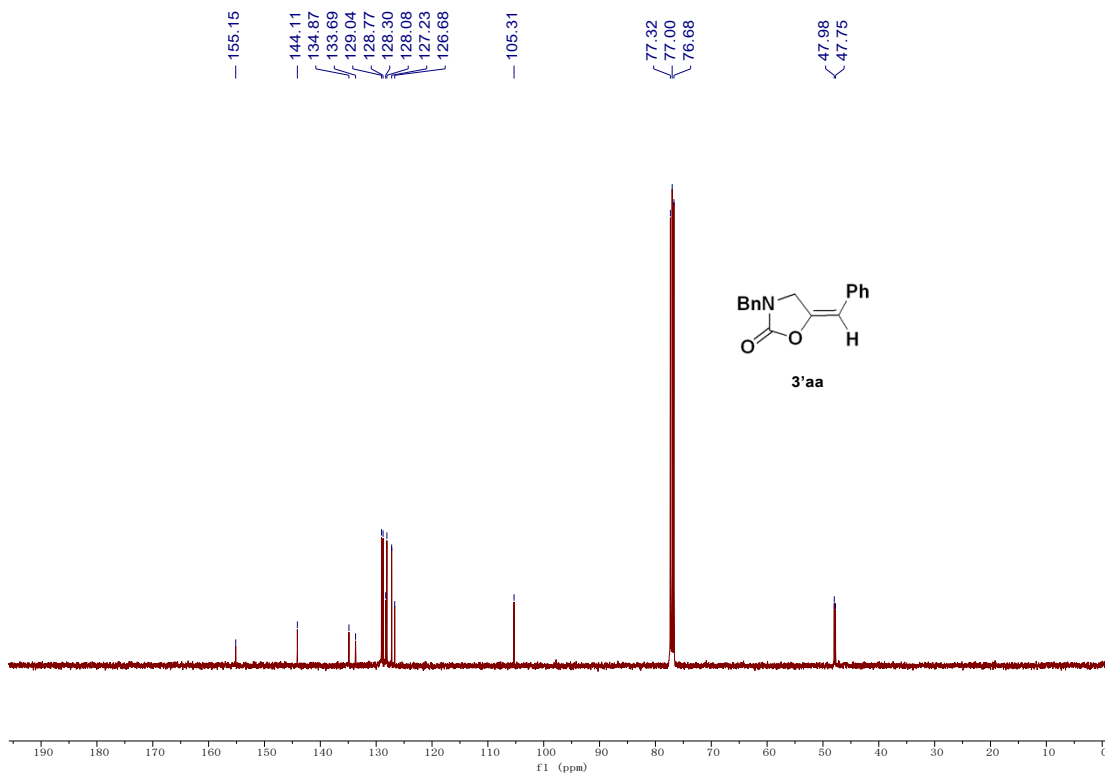

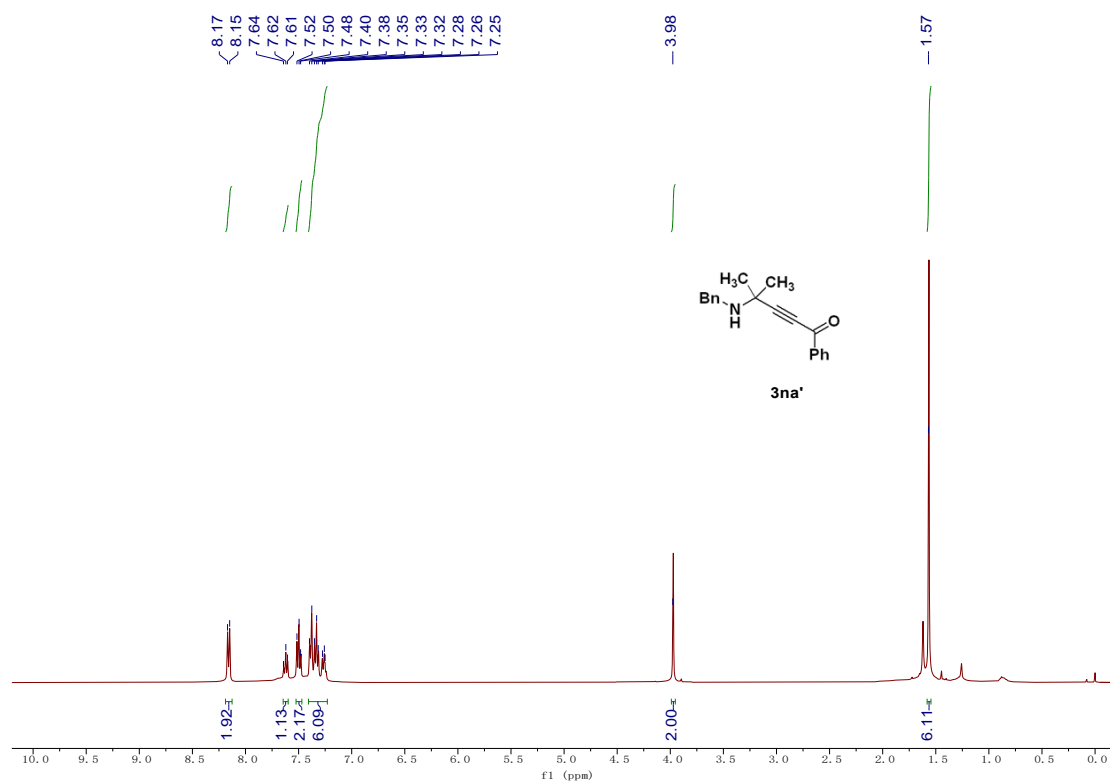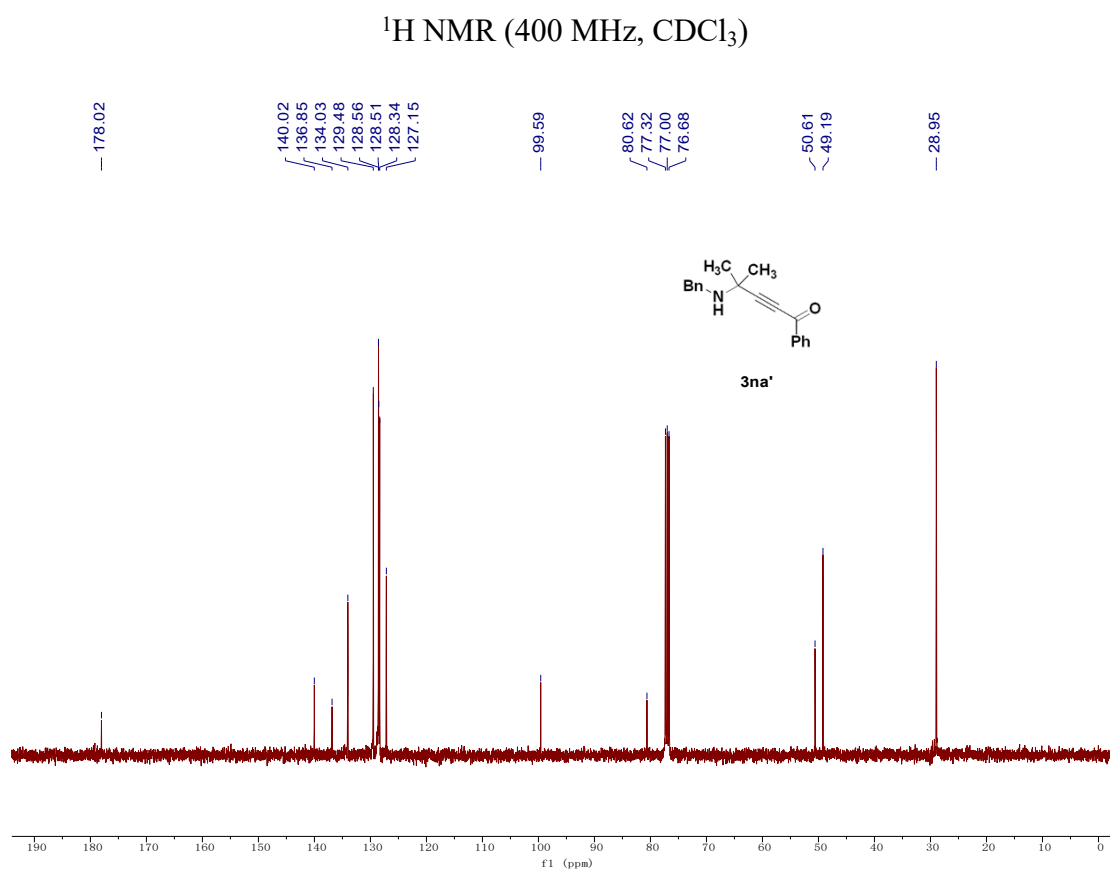

<sup>13</sup>C NMR (101 MHz, CDCl<sub>3</sub>)

## 8. X-Ray crystal Structure of 3aa

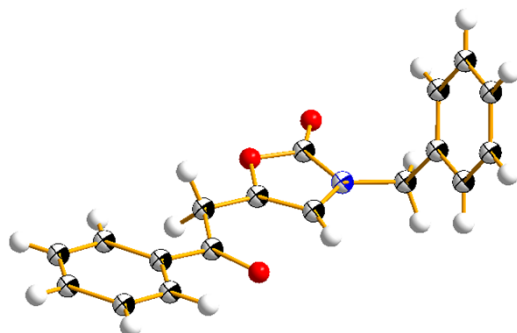

Figure S3 X-ray crystal structure of 3aa

Table S13 Crystal Data and Structure Refinement for 3aa

|                                             |                                                               |
|---------------------------------------------|---------------------------------------------------------------|
| Identification code                         | 3aa                                                           |
| Empirical formula                           | C <sub>18</sub> H <sub>15</sub> NO <sub>3</sub>               |
| Formula weight                              | 293.31                                                        |
| Temperature/K                               | 113.15                                                        |
| Crystal system                              | monoclinic                                                    |
| Space group                                 | P2 <sub>1</sub> /n                                            |
| a/Å                                         | 5.7848(3)                                                     |
| b/Å                                         | 11.3961(5)                                                    |
| c/Å                                         | 21.8769(9)                                                    |
| α/°                                         | 90                                                            |
| β/°                                         | 91.520(4)                                                     |
| γ/°                                         | 90                                                            |
| Volume/Å <sup>3</sup>                       | 1441.71(11)                                                   |
| Z                                           | 4                                                             |
| ρ <sub>calc</sub> /cm <sup>3</sup>          | 1.351                                                         |
| μ/mm <sup>-1</sup>                          | 0.093                                                         |
| F(000)                                      | 616.0                                                         |
| Crystal size/mm <sup>3</sup>                | 0.42 × 0.08 × 0.06                                            |
| Radiation                                   | MoKα (λ = 0.71073)                                            |
| 2θ range for data collection/°              | 4.03 to 56.556                                                |
| Index ranges                                | -7 ≤ h ≤ 7, -15 ≤ k ≤ 15, -29 ≤ l ≤ 29                        |
| Reflections collected                       | 17338                                                         |
| Independent reflections                     | 3567 [R <sub>int</sub> = 0.0774, R <sub>sigma</sub> = 0.0435] |
| Data/restraints/parameters                  | 3567/0/200                                                    |
| Goodness-of-fit on F <sup>2</sup>           | 1.018                                                         |
| Final R indexes [I ≥ 2σ (I)]                | R <sub>1</sub> = 0.0467, wR <sub>2</sub> = 0.1109             |
| Final R indexes [all data]                  | R <sub>1</sub> = 0.0615, wR <sub>2</sub> = 0.1212             |
| Largest diff. peak/hole / e Å <sup>-3</sup> | 0.25/-0.21                                                    |

## REFERENCES

- (1) Wang, M. Y.; Song, Q. W.; Ma, R.; Xie, J. N.; He, L. N. *Green Chem.* **2016**, 18, 282–287.
- (2) Campolo, D.; Arif, T.; Borie, C.; Mouysset, D.; Vanthuyne, N.; Naubron, J. V.; Bertrand, M. P.; Nechab, M. *Angew. Chem. Int. Ed.* **2014**, 53, 3227–3231.
- (3) Hase, S.; Kayaki, Y.; Ikariya, T. *ACS Catal.* **2015**, 5, 5135-5140.
- (4) Molinaro, C.; Jamison, T. F. *J. Am. Chem. Soc.* **2003**, 125, 8076-8077.
- (5) Sekine, K.; Kobayashi, R.; Yamada, T. *Chem. Lett.* **2015**, 44, 1407-1409.
- (6) Hase, S.; Kayaki, Y.; Ikariya, T. *Organometallics* **2013**, 32, 5285-5288.
- (7) Yoshida, M.; Mizuguchi, T.; Shishido, K. *Chem. Eur. J.* **2012**, 18, 15578-15581.
- (8) Katayama, A.; Senboku, H.; Hara, S. *Tetrahedron* **2016**, 72, 4626-4636.
- (9) Harmata, M.; Cai, Z. X.; Huang, C. F.; Brummond, M.; Wen, B. *Org. Synth.* **2011**, 88, 309-316.
- (10) Greenwood, P. D. G.; Grenet, E.; Waser, J. *Chem. Eur. J.* **2019**, 25, 3010-3013.
